# Supplementary material for: Global core indicators for measuring WHO’s paediatric quality-of-care standards in health facilities: development and expert consensus
Source: BMC Health Serv Res. 2022 Jul 8;22:887. doi: 10.1186/s12913-022-08234-5 (PMC9270792; doi:10.1186/s12913-022-08234-5)
Supplement: Supplementary file 2 — Additional file 2: Supplementary file 2. Prioritization algorithm [file 12913_2022_8234_MOESM2_ESM.xlsx]

## Sheet: Prioritization Algorithm
																Mininumm Score for all criteria	16					scores 1-5 (1 lowest, 5 highest)
																Mininumm Score for D1 Inputs	4																												TRUE
																Mininumm Score for D1 Processes	13																												FALSE
																Mininumm Score for Dom 1 outcomes	4
																Mininumm Score for Dom 2	5
																Mininumm Score for Dom 3	2.5
																Minimum Score Common Core	13
													Criteria for all measures							Criteria for Domain 1								Criterion for Domain 2		Criteria for Domain 3					Additional Criteria Common Core				Prioretization results			Additional features		Comment
	Statement	Standard	N	Subdomain		Measures	Measurement Domain	Measurement Scope	Measurement Domain	System categories	Service Settings	Clinical Areas	Relevant	Actionable	Feasible	Valid	Accurate/Reliable	Clear	TotalScore	Importance (inputs)	TotalScore Inputs	Importance	Coverage	EB/Impactful	TotalScore Processes	Importance (Outcomes)	TotalScore Outcomes	Importance	TotalScore Dom2	Participation	Patient Reported	No Harm	Patient's Right	TotalScore Dom3	Useful	Impactful	Comparable	TotalScore Common Core	Prioretized based on additional criteria	Selected for catalogue Measures	Selected for Common Core	Preferred Data Source	Measurement Frequency	Comment
	1.1	1	1	MS-1		1. The health facility has written, up-to-date clinical protocols and procedures for emergency triage, assessment and management of common paediatric emergencies and trauma consistent with evidence-based and/or WHO guidelines. (92.71)		Clinical condition-specific guidelines, protocols, job aides	Provision Of Care	Input ClinGuidelin	Both	1 ASB/ETAT/Asses/class/full	4	4	3	4	2	2	15	4	1.2				0		0		0					0	3	2	2	7	No	NOT SELECTED	NOT SELECTED	InR
	1.1	1	2	MS-1		2. The health facility has the essential equipment and supplies for assessing and monitoring paediatric emergencies (e.g. weighing scales, thermometer, blood pressure measuring device, blood glucose and oxygen saturation tests). (95.59)	Inputs: Clinical Guidelines, protocols, job aides	Clinical condition-specific medicines, supplies and equipment	Provision	Input InfrastMedSupEquip	Both	1 ASB/ETAT/Asses/class/full	4	4	5	5	2	3	18	5	5				0		0		0					0	3	3	4	10	Yes	SELECTED	NOT SELECTED	InR
	1.1	1	3	MS-1		3. The health facility has a 24-h triage system for every sick child to ensure a rapid visual inspection within a few minutes of arrival that is not delayed by administrative or payment procedures. (88.72)	Inputs: Operational Guidelines	Operational guidelines, protocols related to care provision	Provision	Input Over&Man	Both	1 ASB/ETAT/Asses/class/full	4	5	5	4	3	4	18	5	2.5				0		0		0					0	3	3	2	8	No	NOT SELECTED	NOT SELECTED	InR
	1.1	1	4	MS-1		4. The health facility receiving a referred paediatric patient with danger or emergency signs or injuries has a system for immediate emergency care, and a full initial assessment is made by suitably trained staff within 15 min of arrival. (88.30)	Inputs: Operational Guidelines	Operational guidelines, protocols related to care provision inpatient	Provision	Input Over&Man	Inpatient	1 ASB/ETAT/Asses/class/full	5	5	3	4	3	3	17	5	2.5				0		0		0					0	3	3	4	10	No	NOT SELECTED	NOT SELECTED	InR
	1.1	1	5	MS-1		5. The health facility has a designated emergency care area, room or trolley in the outpatient area and wards equipped with appropriate paediatric equipment, supplies and essential medicines for emergency resuscitation and initial treatment. (94.19)	Inputs: infrastructure, equipment, supplies clinical condition-specific	Clinical condition-specific medicines, supplies and equipment	Provision	Input InfrastMedSupEquip	Both	1 ASB/ETAT/Asses/class/full	4	4	4	4	3	4	16	5	5				0		0		0					0	3	3	4	10	Yes	SELECTED	NOT SELECTED	InR
	1.1	1	6	MS-1		6. The designated emergency care area, room or trolley in the outpatient area and wards has visible emergency care aids (e.g. standardized algorithms or protocols, medicines, fluids and treatment dosage wall charts). (90.49)	Inputs: infrastructure, equipment, supplies clinical condition-specific	Clinical condition-specific medicines, supplies and equipment	Provision	Input ClinGuidelin	Both	1 ASB/ETAT/Asses/class/full	4	4	4	3	3	4	15	4	1.2				0		0		0					0	3	3	2	8	No	NOT SELECTED	NOT SELECTED	InR
	1.1	1	7	MS-1		7. The health facility professional staff organize emergency care drills at least once every 12 months for all staff working in paediatric emergency areas and on wards to which severely ill children are admitted. (85.39)	Inputs: Human resources	Human resources (specific clinincal training)	Provision	Input HumRes	Both	1 ASB/ETAT/Asses/class/full	4	4	4	4	3	4	16	5	3.5				0		0		0					0	3	3	3	9	No	NOT SELECTED	NOT SELECTED	Prov		1.1. #7 is similar to #12
	1.1	1	8	MS-1		8. The health facility maintains an update-to-date 24-h staff duty roster, with a functioning contact mechanism for finding additional support, which ensures that staff responsible for paediatric triage are available at all times. (88.95)	Inputs: management and oversight	Oversight and management on care provision	Provision	Input Over&Man	Inpatient	1 ASB/ETAT/Asses/class/full	4	5	3	4	3	3	16	4	2				0		0		0					0	3	3	3	9	No	NOT SELECTED	NOT SELECTED	InR
	1.1	1	12	MS-1		4. Proportion of all professional health staff who care for children in a health facility who received training or refresher courses in emergency triage, assessment and treatment or paediatric emergency care during the past 12 months. (89.59)	Inputs: Human resources	Human resources (specific clinincal training)	Provision	Input HumRes	Both	1 ASB/ETAT/Asses/class/full	4	4	4	4	3	4	16	4	2.8				0		0		0					0	3	3	3	9	No	NOT SELECTED	NOT SELECTED	Prov		1.1. #7 is similar to #12
	1.1	1	13	MS-1		5. Proportion of all professional health staff who care for children in a health facility who received training and/or refresher sessions in the management of common paediatric conditions during the past 12 months. (86.73)	Inputs: Human resources	Human resources (specific clinincal training)	Provision	Input HumRes	Both	1 ASB/ETAT/Asses/class/full	4	4	4	4	3	4	16	4	2.8				0		0		0					0	3	3	3	9	No	NOT SELECTED	NOT SELECTED	Prov
	1.1	1	9	MS-2		1. Proportion of all children with general danger or emergency signs or injuries who were assessed within 15 min of arrival at the facility (86.78)	Processes: EB care, harmful practices, patient-centered practices	Compliance with EB care practices	Provision	Process	Both	1 ASB/ETAT/Asses/class/full	4	4	3	4	3	3	15		0	5	3	3	11		0		0					0	4	4	3	11	No	NOT SELECTED	NOT SELECTED	RIS		Difficult to cocalculate the denominator. I would suggest to measure index of integrated assessment by WHO indicator or assessment of vital and danger signs.
	1.1	1	10	MS-2		2. Proportion of all children with general danger or emergency signs who required referral who received correct emergency and/or prereferral treatment. (88.42)	Processes: EB care, harmful practices, patient-centered practices	Compliance with EB care practices	Provision	Process	Both	1 ASB/ETAT/Asses/class/full	4	4	4	4	4	3	16		0	5	3	5	13		0		0					0	4	4	3	11	Yes	SELECTED	NOT SELECTED	RIS		Note: in the column X, cells highlighted in yellow are the ones with no evidence. The scoring for these measures are done by expert
	1.1	1	11	MS-2		3. Proportion of all children under 5 years of age who did not require urgent referral or admission who were properly assessed according to WHO Integrated management of childhood and neonatal illnesses (IMNCI) guidelines. (84.66)	Processes: EB care, harmful practices, patient-centered practices	Compliance with EB care practices	Provision	Process	Both	1 ASB/ETAT/Asses/class/full	4	4	3	5	4	3	16		0	5	5	5	15		0		0					0	4	5	4	13	Yes	SELECTED	CORE	RIS	Monthly	This is similar to WHO's Index of Integrated Assessment indicator, which includes 10 assessment elements.
	1.1	1	14	MS-2		6. Proportion of all sick children who attended the health facility who were immediately triaged on arrival, before receiving definitive care or a full assessment by a health professional. (82.97)	Inputs: Organization and availability of health services	Organization of care processes (including information exchange, care coordination and referral)	Provision	Process	Both	1 ASB/ETAT/Asses/class/full	4	4	3	4	4	3	15		0	5	5	3	13		0		0					0	4	4	3	11	Yes	NOT SELECTED	NOT SELECTED	RIS
	1.1	1	15	MS-2		7. Proportion of all children in shock who were adequately assessed for signs of shock and were appropriately resuscitated according to WHO guidelines. (87.51)	Processes: EB care, harmful practices, patient-centered practices	Compliance with EB care practices	Provision	Process	Inpatient	1 ASB/ETAT/Asses/class/full	4	4	3	4	4	3	15		0	5	2	5	12		0		0					0	4	4	3	11	No	NOT SELECTED	NOT SELECTED	RIS
	1.1	1	16	MS-3		1. Proportion of all cases of children who died within 24 h of admission whose cases were audited and reviewed as part of performance improvement. (91.49)		Death notification, review	Provision	Input QI	Both	18 Undefined	3	4	3	3	4	5	13		0				0		0		0					0				0	No	NOT SELECTED	NOT SELECTED	InR		1.1. #16 is similar to 2.2. #7 indicator, it is more natural to leave it in standard 2.2
	1.1	1	17	MS-3		2. Proportion of sick children who attended the health facility who were triaged before seeing a doctor for treatment in either the outpatient department or the emergency unit. (77.57)		Organization of care processes (including information exchange, care coordination and referral)	Provision	Process	Both	1 ASB/ETAT/Asses/class/full							0		0				0		0		0					0				0	No	NOT SELECTED	NOT SELECTED	RIS
	1.1	1	18	MS-3		3. The age-disaggregated child mortality rate in the health facility: number of child deaths in the total number of children who presented to the health facility). (93.10)	Impact/No disease-specific care outcomes	Impact inpatient (no clinical content-specific outcomes e.g institutional child mortality)	Provision	Impact	Both	18 Undefined	5	5	4	5	4	3	19		0				0	5	5		0					0	5	4	5	14	Yes	SELECTED	CORE	RIS	Monthly	disaggregate by age and cause
	1.1	1	19	MS-3		4. Proportion of all children with emergency signs who were resuscitated and received emergency care consistent with WHO emergency care protocols and guidelines. (84.96)	Processes: EB care, harmful practices, patient-centered practices	Compliance with EB care practices	Provision	Process	Both	1 ASB/ETAT/Asses/class/full							0		0	5	3	5	13		0		0					0				0	Yes	NOT SELECTED	NOT SELECTED	RIS
	1.2	1	1	MS-1		1. The health facility has written, up-to-date clinical protocols for assessing, identifying and appropriately managing newborns and young infants with PSBI, local infections or jaundice, consistent with WHO guidelines. (93.16)	Inputs: Clinical Guidelines, protocols, job aides	Clinical condition-specific guidelines, protocols, job aides	Provision	Input ClinGuidelin	Both	2 SickYI/Pret/Small	4	4	3	4			15	4	1.2				0		0		0					0	3	3	2	8	No	NOT SELECTED	NOT SELECTED	InR
	1.2	1	2	MS-1		2. The health facility has supplies of antibiotics (first- and second-line) for prereferral treatment and/or full treatment of neonatal sepsis and meningitis that are adequate for the expected case load without stock outs. (95.48)	Inputs: infrastructure, equipment, supplies clinical condition-specific	Clinical condition-specific medicines, supplies and equipment	Provision	Input InfrastMedSupEquip	Both	2 SickYI/Pret/Small	4	4	4	4	3	4	16	5	5				0		0		0					0	3	3	4	10	Yes	SELECTED	NOT SELECTED	InR
	1.2	1	3	MS-1		3. The health facility clinical staff who care for newborn and young infants receive training or regular refresher sessions in recognizing and managing sick young infants at least once every 12 months. (89.30)	Inputs: Human resources	Human resources (specific clinincal training)	Provision	Input HumRes	Both	2 SickYI/Pret/Small	4	4	4	4	3	4	16		0				0		0		0					0	3	3	3	9	No	NOT SELECTED	NOT SELECTED	Prov
	1.2	1	4	MS-1		4. The referral receiving facility for high-risk and severely ill newborn and young infants has appropriate diagnostic tests and medical devices for appropriate investigation and management. (93.40)	Inputs: infrastructure, equipment, supplies clinical condition-specific	Clinical condition-specific medicines, supplies and equipment inpatient	Provision	Input InfrastMedSupEquip	Inpatient	2 SickYI/Pret/Small	4	4	4	4	3	4	16	3	3				0		0		0					0	3	3	4	10	No	NOT SELECTED	NOT SELECTED	InRInI
	1.2	1	5	MS-1		5. The referral receiving facility has adequate material to provide optimal thermal care to preterm and small infants, including facilities for Kangaroo mother care. (93.37)	Inputs: infrastructure, equipment, supplies clinical condition-specific	Clinical condition-specific medicines, supplies and equipment outpatient	Provision	Input InfrastMedSupEquip	Inpatient	2 SickYI/Pret/Small	4	4	4	4	3	4	16	5	5				0		0		0					0	3	3	4	10	Yes	SELECTED	NOT SELECTED	InRInI
	1.2	1	6	MS-1		6. The referral receiving facility for newborns with severe jaundice has procedures in place to assess severity, check bilirubin and provide effective phototherapy. (94.83)		Health Care Services (availability) inpatient	Provision	Input OperGuide	Inpatient	2 SickYI/Pret/Small	4	4	4	4	4	3	16	4	1.2				0		0		0					0	3	3	3	9	No	NOT SELECTED	NOT SELECTED	InR
	1.2	1	7	MS-1		7. The referral facility has a separate area or room in which sick newborns and young infants are admitted and managed. (91.70)	Inputs: infrastructure, equipment, supplies clinical condition-specific	Clinical condition-specific infrastructure inpatient	Provision	Input InfrastMedSupEquip	Inpatient	2 SickYI/Pret/Small	4	4	4	4	3	4	16	3	3				0		0		0					0	3	3	4	10	No	NOT SELECTED	NOT SELECTED	InR
	1.2	1	8	MS-1		8. The referral receiving health facility has facilities for Kangaroo mother care and practises rooming-in of parents with their sick infants. (88.83)	Inputs: infrastructure, equipment, supplies clinical condition-specific	Clinical condition-specific infrastructure inpatient	Provision	Input InfrastMedSupEquip	Inpatient	2 SickYI/Pret/Small	4	4	4	4	3	4	16	3	3				0		0		0					0	3	3	4	10	No	NOT SELECTED	NOT SELECTED	InR
	1.2	1	9	MS-2		1. Proportion of all sick young infants admitted to the health facility with any signs of PSBI who were appropriately classified and managed for PSBI or sepsis. (87.94)	Processes: EB care, harmful practices, patient-centered practices	Compliance with EB care practices inpatient	Provision	Process	Inpatient	2 SickYI/Pret/Small	4	3	3	4	4	3	14		0	5	3	3	11		0		0					0	4	4	3	11	No	NOT SELECTED	NOT SELECTED	Obs		#9 and #10 are similar. Picking #10 measure since it assesses performance at both levels: do not we need to check this indicator at thre
	1.2	1	10	MS-2		2. Proportion of all sick young infants classified as having PSBI or sepsis who were prescribed appropriate antibiotics (correct choice, dose, frequency, route of administration and duration) according to WHO guidelines. (90.86)	Processes: EB care, harmful practices, patient-centered practices	Compliance with EB care practices	Provision	Process	Both	2 SickYI/Pret/Small	4	4	3	5	4	3	16		0	5	4	4	13		0		0					0	4	5	4	13	Yes	SELECTED	CORE	RIS	Monthly
	1.2	1	11	MS-2		3. Proportion of all sick young infants admitted to the facility with PSBI or fast breathing who were appropriately assessed for oxygen requirements with a pulse oximeter and received the documented appropriate amount of oxygen. (85.75)	Processes: EB care, harmful practices, patient-centered practices	Compliance with EB care practices inpatient	Provision	Process	Inpatient	2 SickYI/Pret/Small	4	4	3	5	4	3	16		0	5	4	3	12		0		0					0	4	5	3	12	No	NOT SELECTED	NOT SELECTED	RIS
	1.2	1	13	MS-2		5. Proportion of all sick young infants with severe jaundice whose bilirubin level was checked and who were appropriately managed according to WHO guidelines. (90.70)	Processes: EB care, harmful practices, patient-centered practices	Compliance with EB care practices	Provision	Process	Inpatient	2 SickYI/Pret/Small	4	4	3	4	3	4	15		0	5	1	2	8		0		0					0	4	4	4	12	No	NOT SELECTED	NOT SELECTED	RIS
	1.2	1	14	MS-2		6. Proportion of pre-term and/or small infants weighing < 2000 g who received Kangaroo mother care as part of clinical management in the health facility. (87.11)	Processes: EB care, harmful practices, patient-centered practices	Compliance with EB care practices	Provision	Process	Both	2 SickYI/Pret/Small	4	5	3	4	4	3	16		0	5	4	4	13		0		0					0	4	5	4	13	Yes	SELECTED	CORE	RIS	Monthly
	1.2	1	15	MS-3		7. Proportion of all sick young infants admitted to the facility who were maintained on exclusive breastfeeding and/or received only expressed breast milk during hospitalization, up to discharge. (84.05)	Impact/No disease-specific care outcomes	Children under 6 months exclusively breastfed inpatient	Provision	Outcome	Inpatient	2 SickYI/Pret/Small	3	4	4	4	3	4	15		0	5	4	4	13	5	5		0					0	4	4	4	12	Yes	NOT SELECTED	NOT SELECTED	RIS		Indicator # 10 of 5.5.; #6 of of 6.1., #7 of 1.6. and #15 of 1.2. are the same; we have selected this in Standard 5.5.
	1.2	1	16	MS-3		1. Proportion of all sick young infants treated for PSBI or sepsis who died in the health facility (case fatality rate). (94.20)	Outcomes: clinical condition-specific outcome	Clinical condition-specific outcome inpatient	Provision	Outcome	Inpatient	2 SickYI/Pret/Small	4	4	4	4	3	4	16		0				0	5	5		0					0	4	4	4	12	Yes	SELECTED	NOT SELECTED	RIS
	1.2	1	17	MS-3		2. Proportion of all sick young infants who were readmitted within 48 h of discharge. (85.16)	Outcomes: clinical condition-specific outcome	Clinical condition-specific outcome inpatient	Provision	Outcome	Inpatient	2 SickYI/Pret/Small	4	4	4	4	3	4	16		0				0	3	3		0					0	4	4	4	12	No	NOT SELECTED	NOT SELECTED	RIS
	1.2	1	18	MS-3		3. Proportion of all newborns (0–28 days) managed in the health facility who died in the health facility. (96.96)	Outcomes: clinical condition-specific outcome	Clinical condition-specific outcome inpatient	Provision	Impact	Inpatient	18 Undefined							0		0				0	5	5		0					0	4	4	4	12	Yes	NOT SELECTED	NOT SELECTED	RIS
	1.2	1	19	MS-3		4. The death rate of low-birth-weight infants in the health facility disaggregated by birth weight: 2000–2499 g, 1500–1999 g, < 1500 g. (90.80)	Outcomes: clinical condition-specific outcome	Clinical condition-specific outcome	Provision	Outcome	Outpatient	2 SickYI/Pret/Small	4	4	4	4	4	4	16		0				0	5	5		0					0	4	4	4	12	Yes	SELECTED	NOT SELECTED	RIS
	1.3	1	1	MS-1		1. The health facility has a written, up-to-date, evidence-based clinical protocol for identifying and managing children with cough or difficult breathing, consistent with IMCI and paediatric care guidelines. (93.52)	Inputs: Clinical Guidelines, protocols, job aides	Clinical condition-specific guidelines, protocols, job aides	Provision	Input ClinGuidelin	Both	3 ASB/Cough/Breath	4	4	3	4			15	4	1.2				0		0		0					0	3	3	2	8	No	NOT SELECTED	NOT SELECTED	InR
	1.3	1	2	MS-1		2. The referral receiving health facility has basic laboratory and diagnostic tests (e.g. pulse oximetry, full blood count, culture, ultrasound and chest X-ray) available for appropriate investigation of children with severe pneumonia. (93.03)	Inputs: infrastructure, equipment, supplies clinical condition-specific	Clinical condition-specific medicines, supplies and equipment inpatient	Provision	Input InfrastMedSupEquip	Inpatient	3 ASB/Cough/Breath	4	4	4	4	3	4	16	3	3				0		0		0					0				0	No	NOT SELECTED	NOT SELECTED	InR
	1.3	1	3	MS-1		3. The health facility has adequate supplies of antibiotics (first- and second-line) for treatment of severe pneumonia and pneumonia for the expected case load with no stock outs. (94.94)	Inputs: infrastructure, equipment, supplies clinical condition-specific	Clinical condition-specific medicines, supplies and equipment	Provision	Input InfrastMedSupEquip	Both	3 ASB/Cough/Breath	4	4	4	4	3	4	16	5	5				0		0		0					0				0	Yes	SELECTED	NOT SELECTED	InR
	1.3	1	4	MS-1		4. The health facility has adequate supplies of inhalation bronchodilators and delivery devices for treatment of wheeze for the expected case load with no stock outs. (96.19)	Inputs: infrastructure, equipment, supplies clinical condition-specific	Clinical condition-specific medicines, supplies and equipment	Provision	Input InfrastMedSupEquip	Both	3 ASB/Cough/Breath	4	4	4	4	3	4	16	3	3				0		0		0					0				0	No	NOT SELECTED	NOT SELECTED	InR
	1.3	1	5	MS-1		5. The health facility has an adequate supply of pulse oximeters and a reliable, functioning oxygen supply at all times for the expected case load with no stock outs. (92.27)	Inputs: infrastructure, equipment, supplies clinical condition-specific	Clinical condition-specific medicines, supplies and equipment inpatient	Provision	Input InfrastMedSupEquip	Both	3 ASB/Cough/Breath	4	4	4	4	3	4	16	5	5				0		0		0					0				0	Yes	SELECTED	NOT SELECTED	InR
	1.3	1	6	MS-1		6. The health facility clinical staff who care for children receive training and regular refresher sessions in assessing and managing children with cough or wheeze at least once every 12 months. (89.49)	Inputs: Human resources	Human resources (specific clinincal training)	Provision	Input HumRes	Both	3 ASB/Cough/Breath	4	4	4	4	3	4	16		0				0		0		0					0	3	3	3	9	No	NOT SELECTED	NOT SELECTED	Prov
	1.3	1	7	MS-2		1. Proportion of all children with cough or difficult breathing who are correctly assessed, investigated, classified and diagnosed according to the severity of pneumonia. 88.87)	Processes: EB care, harmful practices, patient-centered practices	Compliance with EB care practices	Provision	Process	Both	3 ASB/Cough/Breath	4	5	3	4	3	3	16		0	5	4	4	13		0		0					0	4	4	3	11	Yes	SELECTED	NOT SELECTED	RIS		#7 and #8 are similar indicators. I suggest to chose one. Since #7 covers both levels, suggest to use #7 but avoid using term "according to severity of pneumonia" and instead use term "severity of disease"
	1.3	1	8	MS-2		2. Proportion of children < 5 years with cough or difficult breathing treated as outpatients who were correctly classified according to IMCI guidelines. (87.08)	Processes: EB care, harmful practices, patient-centered practices	Compliance with EB care practices outpatient	Provision	Process	Outpatient	3 ASB/Cough/Breath	4	4	3	4	3	3	15		0	5	4	4	13		0		0					0	4	4	4	12	Yes	NOT SELECTED	NOT SELECTED	RIS
	1.3	1	9	MS-2		3. Proportion of all children with pneumonia or severe pneumonia who received correct antibiotic treatment (formulation, dose, frequency and duration) according to WHO guidelines. (92.74)	Processes: EB care, harmful practices, patient-centered practices	Compliance with EB care practices	Provision	Process	Both	3 ASB/Cough/Breath	4	5	5	4	3	3	18		0	5	4	4	13		0		0					0	5	5	5	15	Yes	SELECTED	CORE	RIS	Monthly
	1.3	1	10	MS-2		4. Proportion of all children with asthma who were appropriately administered inhalation bronchodilator treatment. (89.87)	Processes: EB care, harmful practices, patient-centered practices	Compliance with EB care practices	Provision	Process	Both	3 ASB/Cough/Breath	4	5	4	4	3	3	17		0	5	4	4	13		0		0					0	4	4	3	11	Yes	SELECTED	NOT SELECTED	RIS		3 or 4: suggest to move this indicator under 1.10 (chronic conditions)
	1.3	1	11	MS-2		5. Proportion of all children with pneumonia to whom oxygen was appropriately administered for the clinical indication (signs of hypoxaemia or oxygen saturation < 90%). (86.98)	Processes: EB care, harmful practices, patient-centered practices	Compliance with EB care practices inpatient	Provision	Process	Inpatient	3 ASB/Cough/Breath	4	4	4	4	3	3	16		0	5	4	4	13		0		0					0	4	4	3	11	Yes	SELECTED	NOT SELECTED	RIS
	1.3	1	12	MS-2		6. Proportion of all children admitted with severe pneumonia whose respiratory rate and oxygen saturation were appropriately monitored. (87.00)	Processes: EB care, harmful practices, patient-centered practices	Compliance with EB care practices inpatient	Provision	Process	Inpatient	3 ASB/Cough/Breath	4	4	3	4	3	3	15		0	5	3	3	11		0		0					0	4	4	3	11	No	NOT SELECTED	NOT SELECTED	RIS
	1.3	1	13	MS-2		7. Proportion of all children with cough for ≥ 14 days who were referred or further assessed and investigated for TB or other causes of chronic infection. (87.28)	Processes: EB care, harmful practices, patient-centered practices	Compliance with EB care practices	Provision	Process	Both	3 ASB/Cough/Breath	4	5	3	4	3	3	16		0	5	3	5	13		0		0					0	4	3	3	10	Yes	SELECTED	NOT SELECTED	RIS
	1.3	1	14	MS-2		8. Proportion of all children with only cough and cold (with no signs of pneumonia or severe pneumonia) who received antibiotics. (79.37)	Processes: EB care, harmful practices, patient-centered practices	Non-evidence-based, harmful practices	Provision	Process	Both	3 ASB/Cough/Breath	4	5	4	4	3	3	17		0	5	5	4	14		0		0					0	5	4	4	13	Yes	SELECTED	CORE	RIS	Monthly
	1.3	1	15	MS-3		1. Proportion of all children managed for pneumonia in the health facility who died of pneumonia (case fatality rate). (94.14)	Outcomes: clinical condition-specific outcome	Clinical condition-specific outcome inpatient	Provision	Outcome	Inpatient	3 ASB/Cough/Breath	4	4	4	5	3	3	17		0	5			5	5	5		0					0	4	4	4	12	Yes	SELECTED	NOT SELECTED	RIS
	1.3	1	16	MS-3		2. Proportion all children who died of pneumonia among all children admitted to the health facility. (85.30)	Outcomes: clinical condition-specific outcome	Clinical condition-specific outcome inpatient	Provision	Outcome	Inpatient	3 ASB/Cough/Breath	4	4	4	3	3	3	15		0	4			4	5	5		0					0	4	4	4	12	Yes	NOT SELECTED	NOT SELECTED	RIS
	1.3	1	17	MS-3		3. Proportion of all children managed for pneumonia in the health facility who died of pneumonia within the initial 24 h of admission. (86.59)	Outcomes: clinical condition-specific outcome	Clinical condition-specific outcome inpatient	Provision	Outcome	Inpatient	3 ASB/Cough/Breath	4	4	3	4	3	3	15		0	4			4	4	4		0					0	4	4	4	12	Yes	NOT SELECTED	NOT SELECTED	RIS
	1.3	1	18	MS-3		4. Proportion of all children managed for wheeze or asthma in the health facility who died of wheeze. (82.68)	Outcomes: clinical condition-specific outcome	Clinical condition-specific outcome inpatient	Provision	Outcome	Inpatient	3 ASB/Cough/Breath	4	4	4	5	3	3	17		0	3			3	5	5		0					0	4	4	4	12	Yes	SELECTED	NOT SELECTED	RIS
	1.4	1	1	MS-1		1. The health facility has a written, up-to-date clinical protocol for identifying and managing children with diarrhoea, consistent with WHO guidelines. (95.23)	Inputs: Clinical Guidelines, protocols, job aides	Clinical condition-specific guidelines, protocols, job aides	Provision	Input ClinGuidelin	Both	4 ASB/Diarrhoea	4	4	3	4			15	4	1.2				0		0		0					0	3	3	2	8	No	NOT SELECTED	NOT SELECTED	InR		Indicator #1 and #2 are very similar
	1.4	1	2	MS-1		2. The health facility staff use standard guidelines to assess, document and appropriately manage children with diarrhoea and dehydration or dysentery, based on WHO guidelines. (91.08)	Inputs: Clinical Guidelines, protocols, job aides	Clinical condition-specific guidelines, protocols, job aides	Provision	Input ClinGuidelin	Both	4 ASB/Diarrhoea	4	4	3	4			15	4	1.2				0		0		0					0	3	3	2	8	No	NOT SELECTED	NOT SELECTED	InR		Indicator #1 and #2 are very similar
	1.4	1	3	MS-1		3. The health facility paediatric outpatient areas and inpatient wards have rehydration algorithms and plan A, B and C charts available and visibly displayed on the walls for use by health care workers and carers. (92.47)	Inputs: Clinical Guidelines, protocols, job aides	Clinical condition-specific guidelines, protocols, job aides	Provision	Input ClinGuidelin	Both	4 ASB/Diarrhoea	4	4	3	4			15	4	1.2				0		0		0					0	3	3	2	8	No	NOT SELECTED	NOT SELECTED	InR
	1.4	1	4	MS-1		4. The health facility has adequate supplies for diarrhoea management (IV fluids, oral rehydration salts [ORS], zinc, antibiotics) for the expected case load without stock outs in the past 3 months. (94.72)	Inputs: infrastructure, equipment, supplies clinical condition-specific	Clinical condition-specific medicines, supplies and equipment	Provision	Input InfrastMedSupEquip	both	4 ASB/Diarrhoea	4	3	4	4	4	3	15	5	5				0		0		0					0	3	3	4	10	Yes	NOT SELECTED	NOT SELECTED	InR
	1.4	1	5	MS-1		5. The health facility has an appropriate designated space with safe, clean water and adequate supplies for preparing ORS for children with diarroea and dehydration. (92.43)	Inputs: infrastructure, equipment, supplies clinical condition-specific	Clinical condition-specific medicines, supplies and equipment	Provision	Input InfrastMedSupEquip	Both	4 ASB/Diarrhoea	4	4	4	4	3	4	16	5	5				0		0		0					0	3	3	4	10	Yes	SELECTED	NOT SELECTED	InR
	1.4	1	16	MS-1		10. Number of days on which the health facilities did not have medicines or supplies to treat diarrhoea (ORS, zinc, IV fluids and supplies, antibiotics) in the past 3 months. (86.38)	Inputs: infrastructure, equipment, supplies clinical condition-specific	Clinical condition-specific medicines, supplies and equipment	Provision	Input InfrastMedSupEquip	Both	4 ASB/Diarrhoea	4	4	4	4	3	4	16	5	5				0		0		0					0	3	3	4	10	Yes	SELECTED	NOT SELECTED	InR
	1.4	1	6	MS-1		6. The health facility clinical staff who care for children receive IMCI training and regular refresher sessions in assessing and managing children with diarrhoea who are dehydrated or have dysentery at least once every 12 months. (90.85)	Inputs: Human resources	Human resources (specific clinincal training)	Provision	Input HumRes	Both	17 IMNCI	4	4	4	4	3	4	16		0				0		0		0					0	3	3	3	9	No	NOT SELECTED	NOT SELECTED	Prov
	1.4	1	7	MS-2		1. Proportion of all children with appropriately classified diarrhoea who were documented as having received an appropriate rehydration treatment plan (A, B or C) according to WHO guidelines. (89.46)	Processes: EB care, harmful practices, patient-centered practices	Compliance with EB care practices	Provision	Process	Both	4 ASB/Diarrhoea	4	5	3	4	3	3	16		0	4	4	5	13		0		0					0	4	4	3	11	Yes	SELECTED	NOT SELECTED	RIS		Indicator #7 and #9 are similar. I suggest using #7 as it assesses treatment at both at inpatient and outpatient; Indicator #7 of 1.4. is inclusive to indicator # 9 and #10. We can have one indicator for inpatient level (Plan c) and #7 at outpatient level and remove ind #9 (Tit is part of ind#7)
	1.4	1	8	MS-2		2. Proportion of all children with dysentry who were correctly prescribed an appropriate course of antibiotics. (91.03)	Processes: EB care, harmful practices, patient-centered practices	Compliance with EB care practices	Provision	Process	Both	4 ASB/Diarrhoea	4	5	3	4	3	3	16		0	4	3	3	10		0		0					0	4	4	3	11	No	NOT SELECTED	NOT SELECTED	RIS
	1.4	1	9	MS-2		3. Proportion of all children with diarrhoea and severe dehydration who were correctly administered IV fluids according to rehydration plan C. (90.60)	Processes: EB care, harmful practices, patient-centered practices	Compliance with EB care practices inpatient	Provision	Process	Inpatient	4 ASB/Diarrhoea	4	5	3	4	3	3	16		0	4	3	5	12		0		0					0	4	4	3	11	No	NOT SELECTED	NOT SELECTED	RIS		Similar to indicator #7
	1.4	1	10	MS-2		4. Proportion of all children managed for diarrhoea and some or no dehydration who were correctly prescribed ORS and zinc supplementation. (88.16)	Processes: EB care, harmful practices, patient-centered practices	Compliance with EB care practices inpatient	Provision	Process	Both	4 ASB/Diarrhoea	4	4	4	4	4	4	16		0	4	4	5	13		0		0					0	4	4	5	13	Yes	SELECTED	CORE	RIS	Monthly
	1.4	1	11	MS-2		5. Proportion all children treated for diarrhoea and dehydration who were not prescribed medicines to reduce stool frequency (anti-motility agents) (80.54)	Processes: EB care, harmful practices, patient-centered practices	Non-evidence-based, harmful practices	Provision	Process	Both	4 ASB/Diarrhoea	4	4	3	4	3	3	15		0	5	5	3	13		0		0					0	4	4	3	11	Yes	NOT SELECTED	NOT SELECTED	RIS
	1.4	1	12	MS-2		6. Proportion of all children admitted with diarrhoea who were correctly monitored for their intake of fluids and foods (85.78)	Processes: EB care, harmful practices, patient-centered practices	Compliance with EB care practices inpatient	Provision	Process	Inpatient	4 ASB/Diarrhoea	4	4	3	4	3	3	15		0	4	3	4	11		0		0					0	4	4	3	11	No	NOT SELECTED	NOT SELECTED	RIS		Indicator #12 and #13 are similar. Suggest to use #8 as it has more complete definition
	1.4	1	13	MS-2		7. Proportion of all children admitted with diarrhoea and dehydration whose fluid intake and feeding were appropriately monitored and documented. (86.05)	Processes: EB care, harmful practices, patient-centered practices	Compliance with EB care practices inpatient	Provision	Process	Inpatient	4 ASB/Diarrhoea	4	4	3	4	3	3	15		0	4	3	4	11		0		0					0	4	4	3	11	No	NOT SELECTED	NOT SELECTED	RIS		This indicator is similar to indicator # 9. prefer definition of indicator #7 as it includes proper classification. I would siggest indicator #7 as it will come from routine documentation while this measure would require observation
	1.4	1	14	MS-2		8. Proportion of all children with diarrhoea and severe dehydration who could not be managed in the facility who were correctly referred after receiving appropriate prereferral treatment. (83.79)	Processes: EB care, harmful practices, patient-centered practices	Compliance with EB care practices outpatient	Provision	Process	Outpatient	4 ASB/Diarrhoea	4	4	3	4	3	3	15		0	5	3	4	12		0		0					0	4	4	3	11	No	NOT SELECTED	NOT SELECTED	RIS		There are few indicators on proper treatment. Perhaps, it might be good to have one indicator on proper classification of diarrhoea based on dehydration and nutrition status assessment and eliminate one or two treatment indicators.
	1.4	1	15	MS-2		9. Proportion of all children with persistent diarrhoea who were correctly assessed for dehydration and nutritional status and correctly treated. (86.09)	Processes: EB care, harmful practices, patient-centered practices	Compliance with EB care practices outpatient	Provision	Process	Both	4 ASB/Diarrhoea	4	4	4	4	3	3	16		0	4	4	5	13		0		0					0	4	4	3	11	Yes	SELECTED	NOT SELECTED	RIS		This indicator is similar to indicator # 7. prefer definition of indicator #7 as it includes proper classification. I would siggest indicator #7 as it will come from routine documentation while this measure would require observation
	1.4	1	17	MS-3		1. Proportion of all children with some dehydration who were successfully rehydrated in the outpatient department and discharged for home treatment. (83.33)	Processes: EB care, harmful practices, patient-centered practices	Compliance with EB care practices outpatient	Provision	Outcome	Both	4 ASB/Diarrhoea	4	4	4	4	3	4	16		0	4	4		8	5	5		0					0	4	4	4	12	Yes	SELECTED	NOT SELECTED	Obs		Outcome; does not need evidence grade
	1.4	1	18	MS-3		2. Proportion of all children managed for diarrhoea with severe dehydration in the health facility who died of diarrhoea. (93.48)	Outcomes: clinical condition-specific outcome	Clinical condition-specific outcome inpatient	Provision	Outcome	Inpatient	4 ASB/Diarrhoea	4	4	4	4	3	4	16		0	5			5	5	5		0					0	4	4	4	12	Yes	SELECTED	NOT SELECTED	RIS
	1.5	1	1	MS-1		1. The health facility has a written, up-to-date, evidence-based clinical protocol for identifying and managing children with fever that is consistent with WHO guidelines. (93.32)	Inputs: Clinical Guidelines, protocols, job aides	Clinical condition-specific guidelines, protocols, job aides	Provision	Input ClinGuidelin	Both	5 ASB/Asses/Clas/Man/Fever	4	4	3	4			15	4	1.2				0		0		0					0	3	3	2	8	No	NOT SELECTED	NOT SELECTED	InR
	1.5	1	2	MS-1		2. The health facility has basic laboratory and diagnostic tests and supplies (e.g. otoscopes, blood glucose tests, malaria smear and/or rapid diagnostic tests, urine tests) available for appropriate assessment of children with fever. (92.68)	Inputs: infrastructure, equipment, supplies clinical condition-specific	Clinical condition-specific medicines, supplies and equipment	Provision	Input InfrastMedSupEquip	Outpatient	5 ASB/Asses/Clas/Man/Fever	4	4	4	4			16	5	5				0		0		0					0	3	3	4	10	Yes	SELECTED	NOT SELECTED	InR
	1.5	1	3	MS-1		3. The referral receiving health facility for children with severe febrile illness has appropriate laboratory and diagnostic tests available for further investigation and management. (92.35)	Inputs: infrastructure, equipment, supplies clinical condition-specific	Clinical condition-specific medicines, supplies and equipment	Provision	Input InfrastMedSupEquip	Inpatient	5 ASB/Asses/Clas/Man/Fever	4	3	4	4			15	5	5				0		0		0					0	3	3	4	10	Yes	NOT SELECTED	NOT SELECTED	InR
	1.5	1	4	MS-1		4. The health facility has adequate supplies of first- and second-line antibiotics for treatment of bacterial infections and antimalarial agents for treatment of malaria in sufficient quantities for the expected case load with no stock outs. (93.18)	Inputs: infrastructure, equipment, supplies clinical condition-specific	Clinical condition-specific medicines, supplies and equipment	Provision	Input InfrastMedSupEquip	Both	5 ASB/Asses/Clas/Man/Fever	4	4	4	4			16	5	5				0		0		0					0	3	3	4	10	Yes	SELECTED	NOT SELECTED	InR
	1.5	1	5	MS-1		5. The health facility clinical staff that care for children receive training and regular refresher sessions in the assessment and management of children with fever at least once every 12 months. (89.71)	Inputs: Human resources	Human resources (specific clinincal training)	Provision	Input HumRes	Both	5 ASB/Asses/Clas/Man/Fever	4	4	4	4	3	4	16		0				0		0		0					0	3	3	3	9	No	NOT SELECTED	NOT SELECTED	Prov
	1.5	1	6	MS-2		1. Proportion of all children seen in the health facility for whom a raised temperature was documented in their medical record. (88.57)	Outcomes: clinical condition-specific outcome	Compliance with EB care practices	Provision	Process	Both	5 ASB/Asses/Clas/Man/Fever	4	5	4	4	4	4	17		0	5	5	3	13		0		0					0	4	4	3	11	Yes	SELECTED	NOT SELECTED	RIS		instead of raised temperature, I suggest to specify temperature was documented
	1.5	1	7	MS-2		2. Proportion of all children admitted to the health facility with fever for whom a documented differential diagnosis was appropriately investigated. (81.63)	Processes: EB care, harmful practices, patient-centered practices	Compliance with EB care practices	Provision	Process	Both	5 ASB/Asses/Clas/Man/Fever	4	4	3	4	4	3	15		0	4	4	4	12		0		0					0	4	4	3	11	No	NOT SELECTED	NOT SELECTED	RIS
	1.5	1	8	MS-2		3. Proportion of all children treated for malaria for whom there is documented evidence of a positive malaria rapid diagnostic test or positive microscopy. (91.86)	Processes: EB care, harmful practices, patient-centered practices	Compliance with EB care practices	Provision	Process	Both	5 ASB/Asses/Clas/Man/Fever	4	4	3	4	4	4	15		0	4	4	1	9		0		0					0	4	4	3	11	No	NOT SELECTED	NOT SELECTED	RIS
	1.5	1	9	MS-2		4. Proportion of all children treated for severe malaria who had documented confirmed malaria and evidence of severe disease. (88.52)	Processes: EB care, harmful practices, patient-centered practices	Non-evidence-based, harmful practices	Provision	Process	Both	5 ASB/Asses/Clas/Man/Fever	4	4	4	4	4	4	16		0	5	4	3	12		0		0					0	4	4	3	11	No	NOT SELECTED	NOT SELECTED	RIS
	1.5	1	10	MS-2		5. Proportion of all children with severe malaria who received the correct treatment (drug, dose, frequency, route of administration and duration) and supportive care according to WHO guidelines. (90.77)	Processes: EB care, harmful practices, patient-centered practices	Compliance with EB care practices	Provision	Process	Both	5 ASB/Asses/Clas/Man/Fever	4	5	3	4	4	4	16		0	5	4	4	13		0		0					0	4	4	5	13	Yes	SELECTED	CORE	RIS	Monthly	suggest to use the definition of 100 core indicator for Malaria treatment
	1.5	1	11	MS-2		6. Proportion of all children with severe febrile illness and suspected meningitis for whom there was documented evidence of lumbar puncture in the medical records. (90.34)	Processes: EB care, harmful practices, patient-centered practices	Compliance with EB care practices	Provision	Process	Inpatient	5 ASB/Asses/Clas/Man/Fever	4	3	4	4	4	4	15		0	5	4	4	13		0		0					0	4	4	3	11	Yes	NOT SELECTED	NOT SELECTED	RIS
	1.5	1	12	MS-2		7. Proportion of all children with meningitis who received correct antibiotic treatment (choice of drug, dose frequency, route of administration and duration) and supportive care according to WHO guidelines. (91.37)	Processes: EB care, harmful practices, patient-centered practices	Compliance with EB care practices	Provision	Process	Inpatient	5 ASB/Asses/Clas/Man/Fever	4	5	3	4	3	3	16		0	5	3	4	12		0		0					0	4	4	3	11	No	NOT SELECTED	NOT SELECTED	RIS
	1.5	1	13	MS-2		8. Proportion of all children with severe febrile illness (e.g. malaria, meningitis, septicaemia, dengue) who were monitored regularly for vital signs and level of consciousness until resolution of severe signs of illness. (88.36)	Processes: EB care, harmful practices, patient-centered practices	Compliance with EB care practices	Provision	Process	Inpatient	5 ASB/Asses/Clas/Man/Fever	4	5	3	4	3	3	16		0	5	4	4	13		0		0					0	4	4	3	11	Yes	SELECTED	NOT SELECTED	RIS
	1.5	1	14	MS-2		9. Proportion of all children with severe febrile illness with suspected septicaemia who were appropriately investigated (e.g. full blood count, urine analysis, blood and urine bacteriology culture). (87.27)	Processes: EB care, harmful practices, patient-centered practices	Compliance with EB care practices	Provision	Process	Inpatient	5 ASB/Asses/Clas/Man/Fever	4	5	3	4	3	3	16		0	5	3	4	12		0		0					0	4	4	3	11	No	NOT SELECTED	NOT SELECTED	RIS
	1.5	1	15	MS-2		10. Proportion of all children treated for septic shock who received the correct antibiotic treatment (choice of drug, dose, frequency, route of administration and duration) and supportive care according to WHO guidelines. (89.74)	Processes: EB care, harmful practices, patient-centered practices	Compliance with EB care practices	Provision	Process	Inpatient	5 ASB/Asses/Clas/Man/Fever	4	5	3	4	3	3	16		0	5	2	5	12		0		0					0	4	4	3	11	No	NOT SELECTED	NOT SELECTED	RIS
	1.5	1	16	MS-3		1. Proportion of all children treated for severe malaria and/or meningitis who had physical or neurological sequelae. (78.84)	Outcomes: clinical condition-specific outcome	Clinical condition-specific outcome	Provision	Outcome	Inpatient	5 ASB/Asses/Clas/Man/Fever	4	4	4	4	3	4	16		0				0	3	3		0					0	4	4	4	12	No	NOT SELECTED	NOT SELECTED	RIS
	1.5	1	17	MS-3		2. Severe malaria case fatality rate disaggregated by age (91.22)	Outcomes: clinical condition-specific outcome	Clinical condition-specific outcome	Provision	Outcome	Inpatient	5 ASB/Asses/Clas/Man/Fever	4	4	4	4	3	4	16		0				0	5	5		0					0	4	3	2	9	Yes	SELECTED	NOT SELECTED	RIS
	1.5	1	18	MS-3		3. Meningitis case fatality rate disaggregated by age. (89.56)	Outcomes: clinical condition-specific outcome	Clinical condition-specific outcome	Provision	Outcome	Inpatient	5 ASB/Asses/Clas/Man/Fever	4	4	4	4	3	4	16		0				0	3	3		0					0	4	4	2	10	No	NOT SELECTED	NOT SELECTED	RIS
	1.5	1	19	MS-3		4. Proportion of all children treated for septicaemia who died (septicaemia case fatality rate). (90.08)	Outcomes: clinical condition-specific outcome	Clinical condition-specific outcome	Provision	Outcome	Inpatient	5 ASB/Asses/Clas/Man/Fever	4	4	4	4	3	4	16		0				0	5	5		0					0	4	4	4	12	Yes	SELECTED	NOT SELECTED	RIS
	1.6	1	1	MS-1		1. The health facility has a written, up-to-date policy for exclusive breastfeeding and appropriate feeding, according to WHO guidelines. (93.37)	Inputs: Operational Guidelines	Operational guidelines, protocols related to client-centered practices	Provision	Input OperGuide	Both	6 RCEB/Nutr/Growth	4	4	4	4	4	3	16	4	1.2				0		0		0					0	3	3	3	9	No	NOT SELECTED	NOT SELECTED	InR
	1.6	1	2	MS-1		2. The health facility maintains a baby-friendly status that supports breastfeeding according to WHO guidelines. (89.03)	Inputs: management and oversight	Oversight and management on patient-centered practices	Provision	Input OperGuide	Both	6 RCEB/Nutr/Growth	4	4	4	4	4	3	16	4	1.2				0		0		0					0	3	3	3	9	No	NOT SELECTED	NOT SELECTED	InR
	1.6	1	3	MS-1		3. The health facility fully complies with the International Code of marketing of breast-milk substitutes and has systems in place to monitor compliance with the Code. (85.43)	Inputs: management and oversight	Oversight and management on patient-centered practices	Provision	Input OperGuide	Both	6 RCEB/Nutr/Growth	4	4	4	4	4	3	16	4	1.2				0		0		0					0	3	3	3	9	No	NOT SELECTED	NOT SELECTED	InR
	1.6	1	4	MS-1		4. The health facility has the necessary supplies and materials to support breastfeeding and, when appropriate, alternative feeding (feeding cups and spoons, infant formula, nasogastric tubes, syringe drivers, IV fluids and tubing). (89.92)	Inputs: infrastructure, equipment, supplies clinical condition-specific	Clinical condition-specific medicines, supplies and equipment	Provision	Input InfrastMedSupEquip	Both	6 RCEB/Nutr/Growth	4	4	4	4	3	4	16	5	5				0		0		0					0	3	3	4	10	Yes	SELECTED	NOT SELECTED	InR
	1.6	1	5	MS-1		5. The professional staff of the health facility who care for children receive training and regular refresher sessions in counselling on breastfeeding and optimal feeding and nutrition of infants and young children at least once every 12 months. (88.49)	Inputs: Human resources	Human resources (specific clinincal training)	Provision	Input HumRes	Both	6 RCEB/Nutr/Growth	4	4	4	4	3	4	16		0				0		0		0					0	3	3	3	9	No	NOT SELECTED	NOT SELECTED	Prov
	1.6	1	6	MS-1		6. The health facility can regularly assess the competence of staff for supporting carers in sustaining optimal infant and young child feeding and nutrition at least once every 12 months. (79.69)	Inputs: management and oversight	Oversight and management on patient-centered practices	Provision	Input Over&Man	Both	6 RCEB/Nutr/Growth	4	5	3	4	4	4	16	4	2				0		0		0					0	3	3	3	9	No	NOT SELECTED	NOT SELECTED	InR
	1.6	1	8	MS-2		2. Proportion of all children < 5 years in the health facility who have been assessed for routine growth and delayed development, as documented on their child health card or booklet. (90.55)	Processes: EB care, harmful practices, patient-centered practices	Compliance with EB care practices outpatient	Provision	Process	Outpatient	6 RCEB/Nutr/Growth	4	4	3	5	3	3	16		0	5	5	3	13		0		0					0	5	4	3	12	Yes	SELECTED	NOT SELECTED	Client
	1.6	1	9	MS-2		3. Proportion of children aged 6–23 months in the health facility who receive appropriate complementary foods according to WHO guidelines. (81.16)	Processes: EB care, harmful practices, patient-centered practices	Compliance with EB care practices	Provision	Process	Outpatient	6 RCEB/Nutr/Growth	4	4	3	5	3	3	16		0	4	5	3	12		0		0					0	4	4	3	11	No	NOT SELECTED	NOT SELECTED	RIS
	1.6	1	10	MS-2		4. Proportion of preterm or small sick infants who receive assisted feeding for whom a correctly prescribed feed volume appropriate for their weight and gestation age is documented. (86.84)	Processes: EB care, harmful practices, patient-centered practices	Compliance with EB care practices inpatient	Provision	Process	Inpatient	2 SickYI/Pret/Small	4	4	3	5	3	3	16		0	5	3	4	12		0		0					0	4	3	3	10	No	NOT SELECTED	NOT SELECTED	RIS		This indicator is more relevant to Standard #1.2. related to preterm/small young infants. It is also relevant to assess feeding support under standard 1.13 feeding support
	1.6	1	12	MS-2		1. Proportion of carers in the health facility who have received counselling on breastfeeding and nutrition to ensure continued, appropriate feeding of the children in their care. (82.94)	Processes: EB care, harmful practices, patient-centered practices	Compliance with EB care practices	Provision	Process	Both	6 RCEB/Nutr/Growth	4	5	3	5	3	3	17		0	4	5	4	13		0		0					0	4	4	3	11	Yes	SELECTED	NOT SELECTED	Pat
	1.6	1	7	MS-3		1. Proportion of all children aged < 6 months in the health facility who are exclusively breastfed or given only expressed breast milk. (87.18)	Impact/No disease-specific care outcomes	Children under 6 months exclusively breastfed	Provision	Outcome	Outpatient	6 RCEB/Nutr/Growth	4	4	4	4	3	4	16		0	4	5	5	14	5	5		0					0	5	5	5	15	Yes	SELECTED	CORE	RIS	Monthly	Indicator # 10 of 5.5.; #6 of of 6.1., #7 of 1.6. and #15 of 1.2. are the same. The only difference is that here, it also includes outpatient; maybe helpful to highlihjt to measure this indicator among babies who were excluseively breastfed before admission (continue exlusive breastfeeding or expressed milk)
	1.6	1	11	MS-3		5. Proportion of all newborn infants in the health facility who receive fully established breastfeeding at the time of discharge. (85.22)	Impact/No disease-specific care outcomes	Children under 6 months exclusively breastfed inpatient	Provision	Outcome	Inpatient	6 RCEB/Nutr/Growth	4	4	4	4	3	4	16		0	4	5	5	14	5	5		0					0	5	4	3	12	Yes	SELECTED	NOT SELECTED	pat		The way indicator is described now seems relevant to childbirth services. We may want to further specify or assess it among small/preterm young infans that stay in facility beyond immediate post-partum
	1.7	1	1	MS-1		The health facility has written, up-to-date clinical protocols for assessment, identification and management of children with acute malnutrition and anaemia consistent with WHO guidelines. (94.07)	Inputs: Clinical Guidelines, protocols, job aides	Clinical condition-specific guidelines, protocols, job aides	Provision	Input ClinGuidelin	Both	7 ASB/Malnut/Anem	4	4	3	4			15	4	1.2				0		0		0					0	3	3	2	8	No	NOT SELECTED	NOT SELECTED	InR
	1.7	1	2	MS-1		The health facility has adequate, functioning equipment (e.g. weighing scales, length and height boards, mid-upper arm circumference tapes) and other supplies for assessing and managing acute malnutrition for the expected case load without stock outs. (94.31)	Inputs: infrastructure, equipment, supplies clinical condition-specific	Clinical condition-specific medicines, supplies and equipment	Provision	Input InfrastMedSupEquip	Outpatient	7 ASB/Malnut/Anem	4	4	4	4	3	4	16	5	5				0		0		0					0	3	3	4	10	Yes	SELECTED	NOT SELECTED	InR
	1.7	1	3	MS-1		The health facility has or is linked to an outpatient or community therapeutic feeding centre that provides nutritional support and counselling. (84.82)	Inputs: Organization and availability of health services	Health Care Services (availability)	Provision	Input OrgCare	Both	7 ASB/Malnut/Anem	4	4	4	4	4	4	16	5	3.5				0		0		0					0				0	No	NOT SELECTED	NOT SELECTED	InR
	1.7	1	4	MS-1		The health facility that is managing children with complicated severe acute malnutrition has adequate medical and nutrition supplies (e.g. antibiotics, F75, F100, Resomal and ready-to-use therapeutic food) available for the expected case load without stocks-outs. (91.96)	Inputs: infrastructure, equipment, supplies clinical condition-specific	Clinical condition-specific medicines, supplies and equipment inpatient	Provision	Input InfrastMedSupEquip	Inpatient	7 ASB/Malnut/Anem	4	4	4	4	3	4	16	5	5				0		0		0					0	3	3	4	10	Yes	SELECTED	NOT SELECTED	InR
	1.7	1	5	MS-1		The health facility has a separate room for all children with complicated severe acute malnutrition, with facilities for keeping them warm (e.g. overhead heaters) and provisions for developmental stimulation. (86.64)	Inputs: infrastructure, equipment, supplies clinical condition-specific	Clinical condition-specific medicines, supplies and equipment inpatient	Provision	Input InfrastMedSupEquip	Inpatient	7 ASB/Malnut/Anem	4	3	4	4	3	4	15	4	4				0		0		0					0	3	3	4	10	Yes	NOT SELECTED	NOT SELECTED	InR
	1.7	1	6	MS-1		The professional staff at the health facility who care for children receive training and regular refresher sessions in assessment, identification, appropriate management and follow-up of children with acute malnutrition at least once every 12 months. (89.42)	Inputs: Human resources	Human resources (specific clinincal training)	Provision	Input HumRes	Both	7 ASB/Malnut/Anem	4	4	4	4	3	4	16		0				0		0		0					0	3	3	3	9	No	NOT SELECTED	NOT SELECTED	Prov
	1.7	1	7	MS-1		The health facility has basic laboratory and diagnostic tests (e.g. blood glucose, full blood count, blood culture, urinalysis, serum electrolytes, chest X-ray) for appropriate investigation and management of children with complicated severe acute malnutrition. (90.48)	Inputs: infrastructure, equipment, supplies clinical condition-specific	Clinical condition-specific medicines, supplies and equipment inpatient	Provision	Input InfrastMedSupEquip	Inpatient	7 ASB/Malnut/Anem	4	3	4	4	3	4	15	4	4				0		0		0					0	3	3	4	10	Yes	NOT SELECTED	NOT SELECTED	InR
	1.7	1	8	MS-2		Proportion of all sick children aged < 5 years seen in the health facility whose nutritional and anaemia status was assessed and classified according to the IMCI guidelines. (89.50)	Processes: EB care, harmful practices, patient-centered practices	Compliance with EB care practices outpatient	Provision	Process	Outpatient	7 ASB/Malnut/Anem	4	4	3	5	3	3	16		0	4	5	4	13		0		0					0	4	4	3	11	Yes	SELECTED	NOT SELECTED	RIS
	1.7	1	9	MS-2		Proportion of all sick children seen in the health facility whose weight and height were assessed and checked against the recommended WHO growth standards. (90.86)	Processes: EB care, harmful practices, patient-centered practices	Compliance with EB care practices outpatient	Provision	Process	Outpatient	7 ASB/Malnut/Anem	4	4	3	5	3	3	16		0	4	5	3	12		0		0					0	4	4	3	11	No	NOT SELECTED	NOT SELECTED	RIS		This indicator is similar to ind #8 under standard 1.6
	1.7	1	10	MS-2		Proportion of all children seen in the health facility with uncomplicated severe acute malnutrition who received correct, appropriate outpatient care according to WHO guidelines. (87.21)	Processes: EB care, harmful practices, patient-centered practices	Clinical condition-specific outcome outpatient	Provision	Process	Both	7 ASB/Malnut/Anem	4	4	3	5	3	3	16		0	5	4	4	13		0		0					0	4	4	3	11	Yes	SELECTED	NOT SELECTED	RIS
	1.7	1	11	MS-2		Proportion of all children admitted to the health facility with complicated severe acute malnutrition whose temperature was measured and recorded on admission. (86.70)	Processes: EB care, harmful practices, patient-centered practices	Compliance with EB care practices inpatient	Provision	Process	Inpatient	7 ASB/Malnut/Anem	4	4	3	5	3	3	16		0	5	3	3	11		0		0					0	4	4	3	11	No	NOT SELECTED	NOT SELECTED	RIS
	1.7	1	12	MS-2		Proportion of all children admitted to the health facility with complicated severe acute malnutrition whose vital signs, feed intake and weight were regularly and adequately monitored during hospitalization. (88.83)	Processes: EB care, harmful practices, patient-centered practices	Compliance with EB care practices inpatient	Provision	Process	Inpatient	7 ASB/Malnut/Anem	4	4	3	5	3	3	16		0	5	3	4	12		0		0					0	4	4	3	11	No	NOT SELECTED	NOT SELECTED	RIS
	1.7	1	13	MS-2		Proportion of all children admitted with complicated severe acute malnutrition who received appropriate feeding at a correct frequency both day and night according to WHO guidelines. (86.80)	Processes: EB care, harmful practices, patient-centered practices	Compliance with EB care practices inpatient	Provision	Process	Inpatient	7 ASB/Malnut/Anem	4	4	3	5	3	3	16		0	5	3	3	11		0		0					0	4	4	3	11	No	NOT SELECTED	NOT SELECTED	RIS
	1.7	1	14	MS-2		Proportion of all children with acute malnutrition whose carers have been counselled and informed about age-appropriate feeding. (83.46)	Processes: EB care, harmful practices, patient-centered practices	Compliance with EB care practices	Provision	Process	Inpatient	7 ASB/Malnut/Anem	4	4	3	5	3	3	16		0	4	4	2	10		0		0					0	4	4	3	11	No	NOT SELECTED	NOT SELECTED	Client
	1.7	1	15	MS-2		Proportion of all children classified or diagnosed with anaemia who are appropriately investigated and prescribed treatment correctly according to WHO guidelines. (89.09	Processes: EB care, harmful practices, patient-centered practices	Compliance with EB care practices	Provision	Process	Both	7 ASB/Malnut/Anem	4	4	3	5	3	3	16		0	4	5	4	13		0		0					0	4	4	3	11	Yes	SELECTED	NOT SELECTED	RIS
	1.7	1	16	MS-3		Case fatality rate from complicated severe acute malnutrition (monthly or every 3 months depending on the number of cases managed). (92.54)	Outcomes: clinical condition-specific outcome	Clinical condition-specific outcome inpatient	Provision	Outcome	Inpatient	7 ASB/Malnut/Anem	4	4	4	4	3	4	16		0				0	4	4		0					0	3	3	3	9	Yes	SELECTED	NOT SELECTED	RIS		This indicator is inpatient. Do we want something on caregiver reported ouitcome?
	1.8	1	1	MS-1		1. The health facility has written, up-to-date guidance on assessing and managing children with suspected TB infection. (94.19)	Inputs: Clinical Guidelines, protocols, job aides	Clinical condition-specific guidelines, protocols, job aides	Provision	Input ClinGuidelin	Both	8 ASB/TB/HIV	4	4	3	4			15	4	1.2				0		0		0					0	3	3	2	8	No	NOT SELECTED	NOT SELECTED	InR
	1.8	1	2	MS-1		2. The health facility offers routine screening for TB symptoms among children at risk (e.g. history of contact with a case of active TB, malnourished or with HIV/AIDS). (89.59)	Inputs: Organization and availability of health services	Health Care Services (availability)	Provision	Input Ser Avail	Outpatient	8 ASB/TB/HIV	3	4	4	3	4	4	14	5	5				0		0		0					0				0	Yes	NOT SELECTED	NOT SELECTED	InR
	1.8	1	3	MS-1		3. Health facilities in areas with a high prevalence of HIV infection routinely offer HIV counselling and testing to all children. (91.51)	Inputs: Organization and availability of health services	Health Care Services (availability)	Provision	Input Ser Avail	Both	8 ASB/TB/HIV	3	4	4	3	4	4	14	5	5				0		0		0					0				0	Yes	NOT SELECTED	NOT SELECTED	InR		maybe better to reframe the indicator to collect it form medical documentation
	1.8	1	4	MS-1		4. The health facility has child-friendly single or fixed-dose formulations of anti-TB medicines available at all times in adequate quantities without stock outs. (92.33)	Inputs: infrastructure, equipment, supplies clinical condition-specific	Clinical condition-specific medicines, supplies and equipment	Provision	Input InfrastMedSupEquip	Both	8 ASB/TB/HIV	4	4	4	4	3	4	16	5	5				0		0		0					0	3	3	4	10	Yes	SELECTED	NOT SELECTED	InR
	1.8	1	5	MS-1		5. The health facility has adequate supplies of antiretroviral therapy and preventive therapy (co-trimoxazole) available at all times for infants and children exposed to and/or infected with HIV. (92.47)	Inputs: infrastructure, equipment, supplies clinical condition-specific	Clinical condition-specific medicines, supplies and equipment	Provision	Input InfrastMedSupEquip	Both	8 ASB/TB/HIV	4	4	4	4	3	4	16	5	5				0		0		0					0	3	3	4	10	Yes	SELECTED	NOT SELECTED	InR
	1.8	1	6	MS-1		6. The professional staff at the health facility receive training and regular refresher sessions on TB prevention, case-finding and management at least once every 12 months. (88.00)	Inputs: Human resources	Human resources (specific clinincal training)	Provision	Input HumRes	Both	8 ASB/TB/HIV	4	4	4	4	3	4	16		0				0		0		0					0	3	3	3	9	No	NOT SELECTED	NOT SELECTED	Prov
	1.8	1	7	MS-2		1. Proportion of all children with a household contact with active TB who received TB preventive treatment. (83.99)	Processes: EB care, harmful practices, patient-centered practices	Compliance with EB care practices	Provision	Process	Both	8 ASB/TB/HIV	4	4	3	4	3	4	15		0	5	4	5	14		0		0					0	4	4	3	11	Yes	NOT SELECTED	NOT SELECTED	RIS
	1.8	1	8	MS-2		2. Proportion of all children with suspected TB who were investigated with an Xpert MTB/RIF for diagnosis of TB. (87.88)	Processes: EB care, harmful practices, patient-centered practices	Compliance with EB care practices	Provision	Process	Outpatient	8 ASB/TB/HIV	4	4	3	4	3	4	15		0	5	4	1	10		0		0					0	4	4	3	11	No	NOT SELECTED	NOT SELECTED	RIS
	1.8	1	9	MS-2		3. Proportion of all children with diagnosed TB who received correct, appropriate treatment (i.e formulation, combination, dose and duration of treatment). (90.49)	Processes: EB care, harmful practices, patient-centered practices	Compliance with EB care practices	Provision	Process	Both	8 ASB/TB/HIV	4	4	4	4	3	4	16		0	5	4	4	13		0		0					0	4	4	3	11	Yes	SELECTED	NOT SELECTED	RIS
	1.8	1	10	MS-2		4. Proportion of all children with diagnosed multi-drug-resistant TB who were appropriately referred. (89.00)	Inputs: Organization and availability of health services	Organization of care processes (including information exchange, care coordination and referral)	Provision	Process	Outpatient	8 ASB/TB/HIV	4	4	3	4	3	4	15		0	4	4	3	11		0		0					0	4	4	3	11	No	NOT SELECTED	NOT SELECTED	RIS		the same as #10 of Standard 1.7.
	1.8	1	11	MS-2		5. Proportion of all children started on TB treatment in the health facility who successfully completed the full course. 89.96)	Outcomes: clinical condition-specific outcome	Clinical condition-specific outcome	Provision	Process	Both	8 ASB/TB/HIV	4	5	3	4	3	4	16		0	4	4	5	13		0		0					0	4	4	4	12	Yes	SELECTED	NOT SELECTED	RIS		Suggest to use standard WHO Indicator: TB treatment success rate
	1.8	1	12	MS-2		6. Proportion of all children who attend health facilities in settings with a high HIV prevalence whose HIV status is known and documented in their medical records. (90.75)	Processes: EB care, harmful practices, patient-centered practices	Compliance with EB care practices	Provision	Process	Both	8 ASB/TB/HIV	4	5	4	4	4	4	17		0	5	4	4	13		0		0					0	4	4	3	11	Yes	SELECTED	NOT SELECTED	RIS		Note: this measure will be important in high prevalence settings; The same as Standard #7
	1.8	1	13	MS-2		7. Proportion of all HIV-positive women who delivered in the health facility who receive appropriate prophylaxis to prevent mother-to-child transmission and antiretroviral therapy according to WHO guidelines. (94.86)	Processes: EB care, harmful practices, patient-centered practices	Compliance with EB care practices	Provision	Process	Both	8 ASB/TB/HIV	3	5	3	3	4	4	14		0	5	4	4	13		0		0					0	4	4	5	13	Yes	NOT SELECTED	NOT SELECTED	RIS		I think this goes bayond child health indicators. Maybe we focus on testing and treatment of exposed/infected infants? Should we measure Maternal prophylaxis or Infant prophylaxis
	1.8	1	14	MS-2		8. Proportion of all children born to HIV-infected mothers who were tested for HIV infection within 8 weeks of birth and received appropriate antiretroviral therapy according to WHO guidelines. (92.50)	Processes: EB care, harmful practices, patient-centered practices	Compliance with EB care practices	Provision	Process	Outpatient	8 ASB/TB/HIV	4	5	3	4	4	4	16		0	5	4	4	13		0		0					0	5	5	3	13	Yes	SELECTED	CORE	RIS	Monthly	we just may split this on two (tested) and second below will be treated
	1.8	1	15	MS-2		9. Proportion of all children with confirmed HIV infection who have started antiretroviral therapy. (96.05)	Processes: EB care, harmful practices, patient-centered practices	Compliance with EB care practices	Provision	Process	Outpatient	8 ASB/TB/HIV	4	5	4	4	4	4	17		0	5	4	4	13		0		0					0	4	4	3	11	Yes	SELECTED	NOT SELECTED	RIS		Note: indicator #14 includes #15. therefore, it is not selected separately. Alternatively, we can focus #14 on testing and #15 on treatment. Note: 100 core monitors AIDS related mortality and Viral load supression (3rd 95 target). This one focuses on 1st two targets, but may be difficult to measure
	1.8	1	16	MS-3		1. Cure rate for childhood TB infection in the health facility. (83.58)	Outcomes: clinical condition-specific outcome	Clinical condition-specific outcome	Provision	Outcome	Outpatient	8 ASB/TB/HIV	4	4	4	4	4	4	16		0				0	4	4		0					0	4	4	5	13	Yes	SELECTED	CORE	RIS	Monthly	Can be standardized as TB treatment success rate as standard 100 core measure
	1.8	1	17	MS-3		2. Case fatality rate among children with HIV infection in the facility. (88.71)	Outcomes: clinical condition-specific outcome	Clinical condition-specific outcome inpatient	Provision	Outcome	Inpatient	8 ASB/TB/HIV	4	4	4	4	4	4	16		0				0	4	4		0					0	4	4	4	12	Yes	SELECTED	NOT SELECTED	RIS		do we need ART retention rate? It would be more impactful. As it is 100 core indicator; Or viral load suppression as it is part of 90-90-90 target
	1.9	1	1	MS-1		1. The health facility has written, up-to-date protocols and guidelines for providing routine child immunization services that are consistent with WHO guidelines. (95.16)	Inputs: Clinical Guidelines, protocols, job aides	Clinical condition-specific guidelines, protocols, job aides	Provision	Input ClinGuidelin	Outpatient	9 RCEB/Vaccin/VitA	4	4	3	4			15	4	1.2				0		0		0					0	3	3	2	8	No	NOT SELECTED	NOT SELECTED	InR
	1.9	1	2	MS-1		2. The health facility has a functioning refrigerator with a temperature monitoring device and sufficient storage capacity to accommodate all the vaccines required for the expected case load. (95.69)	Inputs: infrastructure, equipment, supplies clinical condition-specific	Clinical condition-specific medicines, supplies and equipment	Provision	Input InfrastMedSupEquip	Outpatient	9 RCEB/Vaccin/VitA	4	4	4	4	4	4	16	5	5				0		0		0					0	3	3	4	10	Yes	SELECTED	NOT SELECTED	InR
	1.9	1	3	MS-1		3. The health facility has adequate supplies of immunization cards, tally sheets, ice packs and other supplies to provide daily immunization services at all times with no stock outs. (93.66)	Inputs: infrastructure, equipment, supplies clinical condition-specific	Clinical condition-specific medicines, supplies and equipment	Provision	Input InfrastMedSupEquip	Both	9 RCEB/Vaccin/VitA	4	4	4	4	3	4	16	3	3				0		0		0					0	3	3	4	10	No	NOT SELECTED	NOT SELECTED	InR
	1.9	1	4	MS-1		4. The health facility has adequate supplies of all age-appropriate primary vaccines and human papillomavirus available to provide daily immunization services with no stock outs. (92.81)	Inputs: infrastructure, equipment, supplies clinical condition-specific	Clinical condition-specific medicines, supplies and equipment	Provision	Input InfrastMedSupEquip	Both	9 RCEB/Vaccin/VitA	4	4	4	4	4	4	16	5	5				0		0		0					0	3	3	4	10	Yes	SELECTED	NOT SELECTED	InR
	1.9	1	5	MS-1		5. The health facility has adequate supplies of puncture-resistant, rigid, leak-resistant containers designed to hold used sharps safely during collection, disposal and destruction. (91.51)	Inputs: infrastructure, equipment, supplies clinical condition-specific	Clinical condition-specific medicines, supplies and equipment	Provision	Input InfrastMedSupEquip	Both	9 RCEB/Vaccin/VitA	4	4	4	4	3	4	16	3	3				0		0		0					0	3	3	4	10	No	NOT SELECTED	NOT SELECTED	InR
	1.9	1	6	MS-1		6. The health facility has at least one health professional trained in immunization service delivery, who receives regular refresher sessions at least once every 24 months. (89.51)	Inputs: Human resources	Human resources (specific clinincal training)	Provision	Input HumRes	Both	9 RCEB/Vaccin/VitA	4	4	4	4	3	4	16		0				0		0		0					0	3	3	3	9	No	NOT SELECTED	NOT SELECTED	InR
	1.9	1	7	MS-1		1. Proportion of days on which the refrigerator temperature, monitored twice daily, was not out of the range 2–8 ªC in the past month. (88.19)	Inputs: management and oversight	Oversight and management on cross-cutting supporting systems	Provision	Input Over&Man	Both	9 RCEB/Vaccin/VitA	4	5	3	4	4	4	16	4	2				0		0		0					0	3	3	3	9	No	NOT SELECTED	NOT SELECTED	InR
	1.9	1	8	MS-2		2. Proportion of all children seen in the health facility whose vaccination and vitamin A status was checked. (88.46)	Processes: EB care, harmful practices, patient-centered practices	Compliance with EB care practices	Provision	Process	Outpatient	9 RCEB/Vaccin/VitA	4	4	4	4	4	4	16		0	4	5	4	13		0		0					0	4	4	4	12	Yes	SELECTED	NOT SELECTED	RIS
	1.9	1	9	MS-2		3. Proportion of children 6 months- under 5 years of age who attended the health facility and received vitamin A supplementation in the past 6 months. (86.33)	Processes: EB care, harmful practices, patient-centered practices	Compliance with EB care practices outpatient	Provision	Process	Outpatient	9 RCEB/Vaccin/VitA	4	5	3	4	4	4	16		0	4	5	4	13		0		0					0	4	4	3	11	Yes	SELECTED	NOT SELECTED	RIS
	1.9	1	10	MS-2		4. Proportion of all carers whose children are eligible for the next dose of vaccine who were counselled and know when to return. (80.76)	Processes: EB care, harmful practices, patient-centered practices	Compliance with EB care practices outpatient	Provision	Process	Outpatient	9 RCEB/Vaccin/VitA	4	4	2	4	3	3	14		0	4	5	4	13		0		0					0	4	4	3	11	Yes	NOT SELECTED	NOT SELECTED	Obs
	1.9	1	11	MS-3		1. Proportion of all children under 5 years of age who attended the health facility and left without receiving age-appropriate, up-to-date vaccination according to the guidelines of the WHO expanded programme on immunization. (81.62)	Impact/No disease-specific care outcomes	Impact outpatient ( e.g full vaccination)	Provision	Outcome	Both	9 RCEB/Vaccin/VitA	5	5	3	5	4	3	18		0				0	5	5		0					0	4	4	5	13	Yes	SELECTED	CORE	Obs	Monthly	This indicator is similar to indicator #12 (that measures ony in inpatient).I would suggest to use positive measure: proportion of children visited health care facilities who were fully vaccinated at their age and use it both inpatient and outpatient
	1.9	1	12	MS-3		2. Proportion of all children admitted to the health facility for more than 24 h who were not fully vaccinated for their age. (84.73)	Impact/No disease-specific care outcomes	Impact inpatient (no clinical content-specific outcomes e.g institutional child mortality)	Provision	Outcome	Both	9 RCEB/Vaccin/VitA	5	5	3	5	4	3	18		0				0	5	5		0					0	4	4	4	12	Yes	SELECTED	NOT SELECTED	Client		Similar to indicator #11. Suggest to use the measure #11 above with proposed modificaton
	1.10	1	1	MS-1		1. The health facility has written, up-to-date policies, protocols and guidelines for screening, managing and ensuring the continuity of care in the community for children with common chronic conditions. (89.32)	Inputs: Clinical Guidelines, protocols, job aides	Clinical condition-specific guidelines, protocols, job aides	Provision	Input ClinGuidelin	Both	10 ASB/Chronic/Con	4	4	3	4			15	4	1.2				0		0		0					0	3	3	2	8	No	NOT SELECTED	NOT SELECTED	InR
	1.10	1	2	MS-1		2. The health facility has a model for chronic care that includes a coordinated, multidisciplinary team approach and the participation of children and their families. (81.32)	Inputs: Operational Guidelines	Operational guidelines, protocols related to care provision	Provision	Input OperGuide	Outpatient	10 ASB/Chronic/Con	4	4	4	4	4	3	16	4	1.2				0		0		0					0	3	3	3	9	No	NOT SELECTED	NOT SELECTED	InR
	1.10	1	3	MS-1		3. The health facility has the facilities, supplies and materials necessary to provide optimal care during both acute episodes and routine follow-up of children with chronic conditions. (88.08)	Inputs: infrastructure, equipment, supplies clinical condition-specific	Clinical condition-specific medicines, supplies and equipment	Provision	Input InfrastMedSupEquip	Outpatient	10 ASB/Chronic/Con	4	3	4	4	3	3	15	5	5				0		0		0					0	3	3	4	10	Yes	NOT SELECTED	NOT SELECTED	InR
	1.10	1	4	MS-1		4. Health professionals receive in-service training or refresher sessions in the appropriate care of common chronic childhood conditions (e.g. asthma, sickle-cell disease, diabetes, epilepsy and cardiac disease) at least once every 12 months. (87.81)	Inputs: Human resources	Human resources (specific clinincal training)	Provision	Input HumRes	Outpatient	10 ASB/Chronic/Con	4	4	4	4	3	4	16		0				0		0		0					0	3	3	3	9	No	NOT SELECTED	NOT SELECTED	Prov
	1.10	1	5	MS-1		5. The health facility has an established system for age-appropriate education and counselling for children about their condition, self-management and prevention of complications. (81.45)	Inputs: Operational Guidelines	Operational guidelines, protocols related to client-centered practices	Provision	Input OperGuide	Both	10 ASB/Chronic/Con	4	4	4	4	4	3	16	4	1.2				0		0		0					0	3	3	3	9	No	NOT SELECTED	NOT SELECTED	InR
	1.10	1	9	MS-1		4. Proportion of health professionals who care for children in the health facility who have received in-service training or refresher sessions in appropriate care of common chronic childhood conditions at least once every 12 months. (87.77)	Inputs: Human resources	Human resources (specific clinincal training)	Provision	Input HumRes	Both	10 ASB/Chronic/Con	4	4	4	4	3	4	16		0				0		0		0					0	3	3	3	9	No	NOT SELECTED	NOT SELECTED	Prov		The same as indicator #4 standard 1.10
	1.10	1	8	MS-2		3. Proportion of children who require palliative care, whose physical and emotional care, including pain, side-effects and other symptoms, is assessed and documented. (83.92)	Processes: EB care, harmful practices, patient-centered practices	Compliance with EB care practices	Provision	Process	Both	10 ASB/Chronic/Con	4	4	3	4	3	3	21		0	5	5	3	13		0		0					0	4	3	3	10	Yes	SELECTED	NOT SELECTED	RIS		NCD preventive measures: physical activity, sugar intake are not included in the standards
	1.10	1	10	MS-3		1. Proportion of all children with asthma who are followed at the health facility who were admitted with a severe acute asthmatic attack in the past 3 months. (85.64)	Outcomes: clinical condition-specific outcome	Compliance with EB care practices outpatient	Provision	Outcome	Both	10 ASB/Chronic/Con	4	4	3	5	3	3	16		0	5	3		8	4	4		0					0				0	Yes	SELECTED	NOT SELECTED	Client		This is outcome measure. NCD preventive measures: physical activity, sugar intake are not included in the standards; There are no process measures for chronic conditions: suggest to include 1-2 process measures for Asthma detection and management.
	1.10	1	11	MS-3		2. Proportion of all children with chronic, repeated seizures (epilepsy) who are followed up at the health facility who were admitted with status epilepticus in the past 12 months. (85.55)	Outcomes: clinical condition-specific outcome	Compliance with EB care practices outpatient	Provision	Outcome	Both	10 ASB/Chronic/Con	4	4	3	4	3	3	15		0	5	3		8	4	4		0					0				0	Yes	NOT SELECTED	NOT SELECTED	Client		This is outcome measure NCD preventive measures: physical activity, sugar intake are not included in the standards;
	1.10	1	12	MS-3		3. Proportion of children with a chronic condtion who know and can correctly describe the signs and symptoms that alert them to seek care for their condition. (80.52)	Outcomes: clinical condition-specific outcome	Clinical condition-specific outcome	Provision	Outcome	Both	10 ASB/Chronic/Con	4	5	3	5	3	3	17		0				0	4	4		0					0				0	Yes	SELECTED	NOT SELECTED	Client
	1.10	1	7	MS-3		2. Proportion of children with a chronic condition and/or their carers who understand and are able to describe their condition and the treatment being received correctly. (78.31)	Outcomes: clinical condition-specific outcome	Clinical condition-specific outcome	Provision	Outcome	Both	10 ASB/Chronic/Con	4	5	3	5	3	3	17		0	3	3	4	10	4	4		0					0				0	Yes	SELECTED	NOT SELECTED	Client
	1.11	1	1	MS-1		1. The health facility has a comprehensive written protocol for identifying, assessing and managing children with suspected maltreatment. (90.57)	Inputs: Operational Guidelines	Operational guidelines, protocols related to client-centered practices	Provision	Input OperGuide	Both		4	4	4	4	4	3	16	4	1.2				0		0		0					0	3	3	3	9	No	NOT SELECTED	NOT SELECTED	InR		standard 1.11 can be inclrporated in non-clinical specific standards, such as standard 5
	1.11	1	2	MS-1		2. The health facility staff receive training and refresher sessions on screening, preventing, protecting and managing children with evidence of maltreatment, including neglect and violence. (88.56)	Inputs: Human resources	Human resources: specific non-clinical training	Provision	Input HumRes	Both		4	4	4	4	3	4	16		0				0		0		0					0	3	3	3	9	No	NOT SELECTED	NOT SELECTED	Prov		standard 1.11 can be inclrporated in non-clinical specific standards, such as standard 6
	1.11	1	3	MS-1		3.The health facility has the facilities, supplies and materials to provide optimal, coordinated care to children with suspected maltreatment. (86.67	Inputs: Infrastructure, equipment client-centered	Infrastructure for client-centered practices	Provision	Input InfrastMedSupEquip	Both		4	4	4	4	3	3	16	5	5				0		0		0					0	3	3	4	10	Yes	SELECTED	NOT SELECTED	InR		standard 1.11 can be inclrporated in non-clinical specific standards, such as standard 7
	1.11	1	4	MS-2		1. Proportion of all children with suspected maltreatment who were managed according to established health facility procedures and protocols. (82.17)	Inputs: management and oversight	Oversight and management on patient-centered practices	Provision	Process	Both		4	4	3	4	3	3	15		0	5	5	2	12		0		0					0	4	3	3	10	No	NOT SELECTED	NOT SELECTED	InR		standard 1.11 can be incorporated in non-clinical specific standards, such as standard 8
	1.11	1	5	MS-2		2. Proportion of all children attending the health facility with suspected maltreatment who received psychological services (82.52)	Inputs: Organization and availability of health services	Health Care Services (availability)	Provision	Process	Both		4	5	3	4	3	3	16		0	5	5	3	13		0		0					0	4	4	3	11	Yes	SELECTED	NOT SELECTED	InR		standard 1.11 can be incorporated in non-clinical specific standards, such as standard 9
	1.11	1	6	MS-2		1. Proportion of children with maltreatment for whom a legal opinion was requested. (78.62)	Inputs: management and oversight	Oversight and management on patient-centered practices	Provision	Process	Both		4	4	3	4	3	3	15		0	5	5	2	12		0		0					0	4	3	3	10	No	NOT SELECTED	NOT SELECTED	InR		standard 1.11 can be incorporated in non-clinical specific standards, such as standard 10
	1.11	1	7	MS-2		2. Proportion of maltreatment events in which coordination was sought with other agencies or organizations (e.g. social services, police, judiciary) according to national laws and policies. (82.21)	Inputs: Organization and availability of health services	Organization of care processes (including information exchange, care coordination and referral)	Provision	Process	Both		4	5	3	4	3	3	16		0	5	5	3	13		0		0					0	4	4	3	11	Yes	SELECTED	NOT SELECTED	InR		standard 1.11 can be incorporated in non-clinical specific standards, such as standard 11
	1.12	1	1	MS-1		1. The health facility has written, up-to-date clinical protocols for emergency triage and assessment and appropriate case management of paediatric trauma and surgical conditions, consistent with WHO guidelines. (94.31)	Inputs: Clinical Guidelines, protocols, job aides	Clinical condition-specific guidelines, protocols, job aides	Provision	Input ClinGuidelin	Both	12 Surg/injur	4	4	3	4			15	4	1.2				0		0		0					0	3	3	2	8	No	NOT SELECTED	NOT SELECTED	InR
	1.12	1	2	MS-1		2. The health facility that provides surgical care for children has a system to ensure a coordinated multidisciplinary team that includes a health professional with competence and skills in child surgery. (84.65)	Inputs: Operational Guidelines	Operational guidelines, protocols related to client-centered practices	Provision	Input OperGuide	Both	12 Surg/injur	4	4	4	4	4	3	16	4	1.2				0		0		0					0	3	3	3	9	No	NOT SELECTED	NOT SELECTED	InR
	1.12	1	3	MS-1		3. Health professionals receive in-service training and refresher sessions in appropriate care of child injuries, trauma and other common paediatric surgical conditions at least once every 12 months. (87.73)	Inputs: Human resources	Human resources (specific clinincal training)	Provision	Input HumRes	Both	12 Surg/injur	4	4	4	4	3	4	16		0				0		0		0					0	3	3	3	9	No	NOT SELECTED	NOT SELECTED	InR
	1.12	1	4	MS-1		4. The health facility has a designated area for the management of children with surgical problems by health professionals who are trained or who have knowledge and skills in child care. (89.07)	Inputs: infrastructure, equipment, supplies clinical condition-specific	Clinical condition-specific infrastructure inpatient	Provision	Input InfrastMedSupEquip	Inpatient	12 Surg/injur	4	4	4	4	3	3	16	5	5				0		0		0					0	3	3	4	10	Yes	SELECTED	NOT SELECTED	InR
	1.12	1	5	MS-1		5. All children who have undergone surgery are closely monitored, with careful documentation of intake (fluids and feeds) and output (e.g. urine, nasogastric drainage). (89.30)	Processes: EB care, harmful practices, patient-centered practices	Compliance with EB care practices inpatient	Provision	Process	Inpatient	12 Surg/injur							0		#N/A	5	3	4	12		0		0					0				0	#N/A	#N/A	#N/A	RIS
	1.12	1	6	MS-2		1. Proportion of children undergoing major surgery who received appropriate perioperative antibiotic prophylaxis within 30 min of incision, when indicated. (86.23)	Processes: EB care, harmful practices, patient-centered practices	Compliance with EB care practices inpatient	Provision	Process	Inpatient	12 Surg/injur	4	5	3	4	3	3	16		0	5	4	4	13		0		0					0	4	4	3	11	Yes	SELECTED	NOT SELECTED	RIS
	1.12	1	7	MS-1		2. Proportion of all children undergoing surgery who were admitted to a designated paediatric area staffed by health professionals trained in child care. (84.45)	Inputs: Human resources	Human resources (staff clinincal training) inpatient	Provision	Input HumRes	Inpatient	12 Surg/injur	4	4	3	4	3	4	15		0				0		0		0					0	3	3	3	9	No	NOT SELECTED	NOT SELECTED	InR
	1.12	1	8	MS-2		3. Proportion of all children with trauma or injuries who were assessed within 15 min of arrival at the health facility. (87.70)	Processes: EB care, harmful practices, patient-centered practices	Compliance with EB care practices	Provision	Process	Both	12 Surg/injur	4	5	3	4	3	3	16		0	5	4	5	14		0		0					0	4	4	3	11	Yes	SELECTED	NOT SELECTED	RIS		This indicator is also relevant to Standard 1.1.
	1.12	1	9	MS-2		4. Proportion all children with moderate or severe pain whose pain was relieved (where indicated) within 30 min of arrival at the health facility. (83.89)	Processes: EB care, harmful practices, patient-centered practices	Compliance with EB care practices inpatient	Provision	Process	Inpatient	12 Surg/injur	4	5	2	4	3	3	15		0	5	4	4	13		0		0					0	4	4	3	11	Yes	NOT SELECTED	NOT SELECTED	RIS
	1.12	1	10	MS-3		1. Health facility complication rates for patients who underwent surgery. (89.88)	Outcomes: clinical condition-specific outcome	Clinical condition-specific outcome inpatient	Provision	Outcome	Inpatient	12 Surg/injur	4	5	3	5	3	3	17		0				0	4	4		0					0	3	3	4	10	Yes	SELECTED	NOT SELECTED	RIS
	1.12	1	11	MS-3		2. Health facility mortality rate for all children who underwent surgery. (95.70)	Outcomes: clinical condition-specific outcome	Clinical condition-specific outcome inpatient	Provision	Outcome	Inpatient	12 Surg/injur	4	5	3	4	3	3	16		0				0	4	4		0					0	4	4	5	13	Yes	SELECTED	CORE	RIS	Monthly	In 100 core, there is a standardized indicator, which is named as Perioperative mortality. I suggest to use this term
	1.12	1	12	MS-3		3. Case fatality rate of children with trauma and/or injuries. (94.64)	Outcomes: clinical condition-specific outcome	Clinical condition-specific outcome inpatient	Provision	Outcome	Inpatient	12 Surg/injur	4	5	3	3	3	3	15		0				0	4	4		0					0	3	3	4	10	Yes	NOT SELECTED	NOT SELECTED	RIS		Trauma and injuries have not prioretized as some of these will be included in surgeries anyway
	1.13	1	1	MS-1		1. The health facility has written, up-to-date protocols for monitoring and providing supportive care for various conditions for all children admitted to the wards. (91.11)	Inputs: Operational Guidelines	Operational guidelines, protocols related to care provision inpatient	Provision	Input OperGuide	Inpatient	13 Support/Sick	4	4	4	4	4	3	16	4	1.2				0		0		0					0	3	3	3	9	No	NOT SELECTED	NOT SELECTED	InR
	1.13	1	2	MS-1		2. The health facility has age-appropriate patient monitoring charts that include a provision for recording details of clinical progress and vital signs and of the treatment and supportive care provided. (92.60)	Input Heal&Sys	Standardized medical documentation and forms Inpatient	Provision	Input Heal&Sys	Inpatient	13 Support/Sick	3	4	4	3	3	3	14		0				0		0		0					0				0	No	NOT SELECTED	NOT SELECTED	InR		also relevant for Standard #2
	1.13	1	3	MS-1		3. The health facility has a designated area for managing seriously sick children that is close and easily visible to the nursing staff on the ward. (93.03)	Inputs: infrastructure, equipment, supplies clinical condition-specific	Clinical condition-specific infrastructure inpatient	Provision	Input InfrastMedSupEquip	Inpatient	13 Support/Sick	4	4	4	4	3	4	16	5	5				0		0		0					0	3	3	4	10	Yes	SELECTED	NOT SELECTED	InR
	1.13	1	4	MS-1		4. Health professionals receive in-service training and regular refresher sessions on patient monitoring and supportive care at least once every 12 months. (89.55)	Inputs: Human resources	Human resources (staff clinincal training) inpatient	Provision	Input HumRes	Inpatient	13 Support/Sick	4	4	4	4	3	4	16		0				0		0		0					0	3	3	3	9	No	NOT SELECTED	NOT SELECTED	Prov
	1.13	1	5	MS-2		5. Proportion of all unconscious children admitted to the wards who received a nasogastric tube for feeding. (82.66)	Processes: EB care, harmful practices, patient-centered practices	Compliance with EB care practices inpatient	Provision	Process	Inpatient	13 Support/Sick	4	5	3	4	3	3	16		0	5	3	4	12		0		0					0	4	4	3	11	No	NOT SELECTED	NOT SELECTED	RIS
	1.13	1	6	MS-2		6. Proportion of all severely ill children who cannot feed orally for whom blood glucose monitoring is documented on their observation chart. (88.78)	Processes: EB care, harmful practices, patient-centered practices	Compliance with EB care practices inpatient	Provision	Process	Inpatient	13 Support/Sick	4	5	3	4	3	3	16		0	5	3	4	12		0		0					0	4	4	3	11	No	NOT SELECTED	NOT SELECTED	RIS
	1.13	1	7	MS-2		7. Proportion of all children who received oxygen for which the prescribed method and rate of delivery are documented. (87.47)	Processes: EB care, harmful practices, patient-centered practices	Compliance with EB care practices inpatient	Provision	Process	Inpatient	13 Support/Sick	4	5	3	4	3	3	16		0	5	3	4	12		0		0					0	4	4	3	11	No	NOT SELECTED	NOT SELECTED	RIS
	1.13	1	8	MS-2		8. Proportion of all children admitted to the health facility who were appropriately monitored and for whom observations were recorded by a nurse according to the guidelines. (88.56)	Processes: EB care, harmful practices, patient-centered practices	Compliance with EB care practices inpatient	Provision	Process	Inpatient	13 Support/Sick	4	4	3	4	3	3	15		0	5	4	4	13		0		0					0	4	4	3	11	Yes	NOT SELECTED	NOT SELECTED	RIS
	1.13	1	9	MS-2		9. Proportion of all children admitted to the health facility who are reassessed every working day by a clinician trained in child health care. (87.16)	Processes: EB care, harmful practices, patient-centered practices	Compliance with EB care practices inpatient	Provision	Process	Inpatient	13 Support/Sick	4	5	2	4	3	3	15		0	5	5	3	13		0		0					0	4	4	3	11	Yes	NOT SELECTED	NOT SELECTED	RIS
	1.13	1	10	MS-2		10. Proportion of all children with convulsions who were appropriately investigated and correctly prescribed anticonvulsant treatment (appropriate choice, dose and frequency). (89.29)	Processes: EB care, harmful practices, patient-centered practices	Compliance with EB care practices inpatient	Provision	Process	Inpatient	13 Support/Sick	4	5	3	4	3	3	16		0	5	3	5	13		0		0					0	4	4	3	11	Yes	SELECTED	NOT SELECTED	RIS
	1.13	1	11	MS-2		11. Proportion of all children who required antipyretics who were prescribed the correct treatment (appropriate choice, dose and frequency) to reduce their temperature. (86.15)	Processes: EB care, harmful practices, patient-centered practices	Compliance with EB care practices inpatient	Provision	Process	Inpatient	13 Support/Sick	4	4	3	4	3	3	15		0	5	4	4	13		0		0					0	4	4	3	11	Yes	NOT SELECTED	NOT SELECTED	RIS
	1.13	1	12	MS-2		12. Proportion of all children in pain for whom analgesic treatment was correctly prescribed (appropriate choice, dose and frequency). (85.23)	Processes: EB care, harmful practices, patient-centered practices	Compliance with EB care practices inpatient	Provision	Process	Inpatient	13 Support/Sick	4	5	3	4	3	3	16		0	5	4	4	13		0		0					0	4	4	3	11	Yes	SELECTED	NOT SELECTED	RIS
	1.13	1	13	MS-2		13. Proportion of all children who required a blood transfusion for severe anaemia who received the transfusion. (90.91)	Processes: EB care, harmful practices, patient-centered practices	Compliance with EB care practices inpatient	Provision	Process	Inpatient	13 Support/Sick	4	4	4	4	3	3	16		0	5	2	3	10		0		0					0	4	4	3	11	No	NOT SELECTED	NOT SELECTED	RIS		Important features, such as counselling and discharge from hospital would be good to address by this standard as part of supportive care provided to sick child
	1.13	1	14	MS-3		5. Proportion of all severely ill children who died in the health facility whose death was attributed to aspiration. (78.23)	Outcomes: clinical condition-specific outcome	Clinical condition-specific outcome inpatient	Provision	Outcome	Inpatient	13 Support/Sick	4	4	3	5	3	3	16		0				0	4	4		0					0				0	Yes	SELECTED	NOT SELECTED	RIS
	1.14	1	1	MS-1		1. The health facility has written, up-to-date guidelines, protocols and standard operating procedures for the prevention and control of infection in the facility. (95.66)	Inputs: Operational Guidelines	Operational guidelines, protocols related to cross-cutting supporting systems (management, human resources, health information system, infrastructure, supplies and equipment, health financing, organization of health services)	Provision	Input OperGuide	Both	14 IPC/WASH	4	4	4	4	4	3	16	4	1.2				0		0		0					0	3	3	3	9	No	NOT SELECTED	NOT SELECTED	InR		1.14 statement can be incorporated in quality statement 8.2.
	1.14	1	2	MS-1		2. The health facility has specific guidelines and protocols on hand hygiene and aseptic technique and device management for clinical procedures (e.g. injection safety, use of indwelling catheters and other invasive procedures). (95.15)	Inputs: Operational Guidelines	Operational guidelines, protocols in place (WASH-related)	Provision	Input OperGuide	Both	14 IPC/WASH	4	4	4	4	4	3	16	4	1.2				0		0		0					0	3	3	3	9	No	NOT SELECTED	NOT SELECTED	InR		1.14 statement can be incorporated in quality statement 8.2.
	1.14	1	3	MS-1		3. The health facility has plans for infection prevention and control preparedness and response for public health emergencies due to communicable diseases (e.g. pandemics). (91.43)	Inputs: Operational Guidelines	Operational guidelines, protocols related to cross-cutting supporting systems (management, human resources, health information system, infrastructure, supplies and equipment, health financing, organization of health services)	Provision	Input OperGuide	Both	14 IPC/WASH	4	4	4	4	4	3	16	4	1.2				0		0		0					0	3	3	3	9	No	NOT SELECTED	NOT SELECTED	InR		1.14 statement can be incorporated in quality statement 8.2.
	1.14	1	4	MS-1		4. The health facility has a functioning improved water source and hand-washing stations with soap and single-use hand towels and/or alcohol-based hand rub in all wards and consulting rooms. (95.82)	Inputs: Infrastructure, equipment, supplies cross-cutting	Infrastructure/equipment cross-cutting (e.g. WASH)	Provision	Input InfrastMedSupEquip	Both	14 IPC/WASH	4	4	4	4	4	4	16	5	5				0		0		0					0	3	3	4	10	Yes	SELECTED	NOT SELECTED	InR		Suggested revision from meg: The health facility has a functioning improved water source and has functional hand-washing stations with soap and water or and single-use hand towels and/or alcohol-based hand rub in all wards, and consulting rooms and near toilets. (95.82) 1.14 statement can be incorporated in quality statement 8.2. Inputs are not paediatric QoC relevant: they are cross-cutting
	1.14	1	5	MS-1		5. The health facility has appropriate sterilizing facilities and disinfectants for medical materials. (95.94)	Inputs: Infrastructure, equipment, supplies cross-cutting	Supplies and equipment cross-cutting (essential medicines)	Provision	Input InfrastMedSupEquip	Both	14 IPC/WASH	4	4	4	4	3	4	16	5	5				0		0		0					0	3	3	4	10	Yes	SELECTED	NOT SELECTED	InR		1.14 statement can be in Inputs are not paediatric QoC relevant: they are cross-cuttingcorporated in quality statement 8.2.
	1.14	1	6	MS-1		6. The health facility has a functioning incinerator or other appropriate method for treatment of infectious waste and used instruments. (95.73)	Inputs: Infrastructure, equipment, supplies cross-cutting	Supplies and equipment cross-cutting (essential medicines)	Provision	Input InfrastMedSupEquip	Both	14 IPC/WASH	4	4	4	4	3	4	16	5	5				0		0		0					0	3	3	4	10	Yes	SELECTED	NOT SELECTED	InR		Suggested revision from Meg: The health facility has a functioning incinerator or other appropriate method for treatment of health care waste 1.14 statement can be incorporated in quality statement 8.2. Inputs are not paediatric QoC relevant: they are cross-cutting
	1.14	1	7	MS-1		7. The health facility has a system to ensure safe handling, collection, storage (puncture resistant) and final disposal of infectious waste. (95.00)	Inputs: management and oversight	Oversight and management on cross-cutting supporting systems	Provision	Input OperGuide	Both	14 IPC/WASH	4	4	4	4	4	3	16	5	1.5				0		0		0					0	3	3	3	9	No	NOT SELECTED	NOT SELECTED	InR		Suggested revisin from Meg: The health facility has a system to ensure safe handling, collection, storage (puncture resistant) and final treatment and disposal of infectious waste. 1.14 statement can be incorporated in quality statement 8.2.
	1.14	1	8	MS-1		8. The health facility has at least one designated trained staff member and/or infection control team, with a sufficient budget to perform the tasks of the facility infection prevention and control programme. (89.97)	Inputs: financing	Financing of cross-cutting supporting systems (energy, fuel for vehicles)	Provision	Input Financing	Both	14 IPC/WASH	4	3	4	4	4	4	15	5	1.5				0		0		0					0	2	2	3	7	No	NOT SELECTED	NOT SELECTED	InR		1.14 statement can be incorporated in quality statement 8.2.
	1.14	1	9	MS-1		9. Health professionals who care for children receive training in standard infection prevention and control at least once every 12 months. (89.99)	Inputs: Human resources	Human resources (specific clinincal training)	Provision	Input HumRes	Both	14 IPC/WASH	4	4	4	4	3	4	16		0				0		0		0					0	3	3	3	9	No	NOT SELECTED	NOT SELECTED	Prov		1.14 statement can be incorporated in quality statement 8.2.
	1.14	1	10	MS-1		1. Proportion of health professionals in the health facility who have been trained in use of the WHO “5 moments for hand hygiene” audit tool. (89.57)	Inputs: Human resources	Human resources (specific clinincal training)	Provision	Input HumRes	Both	14 IPC/WASH	4	4	4	4	3	4	16		0				0		0		0					0	3	3	3	9	No	NOT SELECTED	NOT SELECTED	Prov		1.14 statement can be incorporated in quality statement 8.2.
	1.14	1	11	MS-1		2. Evidence that the facility staff member or team responsible for infection prevention and control regularly collects data on episodes of hospital-acquired infection and has conducted at least one assessment of infection prevention and control practices in the past 6 months. (90.35)	Inputs: QI structures and supporting processes	Routine monitoring of the quality of care inpatient	Provision	Process	Inpatient	14 IPC/WASH	4	5	4	4	4	4	17						0		0		0					0	3	3	3	9	No	NOT SELECTED	NOT SELECTED	InR		1.14 statement can be incorporated in quality statement 8.2.
	1.14	1	13	MS-2		4. Proportion of staff members in the health facility who meet biosafety standards when administering parenteral drugs. (82.16)	Processes: EB care, harmful practices, patient-centered practices	Compliance with EB care practices inpatient	Provision	Process	Inpatient	14 IPC/WASH	4	4	3	4	3	3	15		0	5	4	4	13		0		0					0	3	3	3	9	Yes	NOT SELECTED	NOT SELECTED	Obs		1.14 statement can be incorporated in quality statement 8.2.
	1.14	1	12	MS-3		3. Proportion of all children who received IV infusions who had an episode of phlebitis. (81.00)		Routine monitoring of the quality of care inpatient	Provision	Outcome	Inpatient	14 IPC/WASH	4	4	3	5	4	3	16		0				0	4	4		0					0	3	3	3	9	Yes	SELECTED	NOT SELECTED	RIS		1.14 statement can be incorporated in quality statement 8.2.
	1.14	1	14	MS-3		1. Proportion of children admitted to the health facility who had proven hospital-acquired infections. (87.57)	Outcomes: clinical condition-specific outcome	Clinical condition-specific outcome inpatient	Provision	Outcome	Inpatient	14 IPC/WASH	4	4	3	5	4	4	16		0				0	4	4		0					0	3	3	3	9	Yes	SELECTED	NOT SELECTED	RIS		1.14 statement can be incorporated in quality statement 8.2.
	1.15	1	1	MS-1		1. The health facility has written, up-to-date guidance on unnecessary procedures, harmful practices and unnecessary interventions for children. (84.11)	Inputs: Operational Guidelines	Operational guidelines, protocols related to client-centered practices	Provision	Input ClinGuidelin	Both	15 Prev/unnes/harm	4	4	3	4			15	4	1.2				0		0		0					0	3	3	2	8	No	NOT SELECTED	NOT SELECTED	InR
	1.15	1	2	MS-1		2. The health facility does not promote infant formula on the wards, and samples are not distributed to mothers or staff. (86.46)	Inputs: management and oversight	Oversight and management on patient-centered practices	Provision	Input Over&Man	Both	15 Prev/unnes/harm	4	5	4	4	4	4	17	5	2.5				0		0		0					0	3	3	3	9	No	NOT SELECTED	NOT SELECTED	InR
	1.15	1	3	MS-1		3. The health facility does not display infant formula or bottles and teats, including on posters or placards. (86.82)	Inputs: management and oversight	Oversight and management on patient-centered practices	Provision	Input Over&Man	Both	15 Prev/unnes/harm	4	5	4	4	4	4	17	5	2.5				0		0		0					0	3	3	3	9	No	NOT SELECTED	NOT SELECTED	InR
	1.15	1	4	MS-1		4. Health care staff in the facility receive in-service training and regular refresher sessions on harmful practices and unnecessary interventions at least once every 12 months. (83.56)	Inputs: Human resources	Human resources (specific clinincal training)	Provision	Input HumRes	Both	15 Prev/unnes/harm	4	4	4	4	3	4	16		0				0		0		0					0	3	3	3	9	No	NOT SELECTED	NOT SELECTED	Prov
	1.15	1	5	MS-2		1. Proportion of young infants on formula when this is not indicated for the health of the mother or the infant. (78.96)	Processes: EB care, harmful practices, patient-centered practices	Compliance with EB care practices	Provision	Process	Both	15 Prev/unnes/harm	4	4	3	3	3	3	14		0	5	4	4	13		0		0					0	4	4	3	11	Yes	NOT SELECTED	NOT SELECTED	Obs
	1.15	1	6	MS-2		2. Proportion of children admitted to wards with no indication for hospital admission. (75.36)	Processes: EB care, harmful practices, patient-centered practices	Non-evidence-based, harmful practices inpatient	Provision	Process	Inpatient	15 Prev/unnes/harm	4	4	3	4	3	3	15		0	4	4	3	11		0		0					0	4	3	3	10	No	NOT SELECTED	NOT SELECTED	RIS
	1.15	1	7	MS-2		3. Proportion of children admitted to the health facility who receive IV fluids with no clear indication. (76.96)	Processes: EB care, harmful practices, patient-centered practices	Non-evidence-based, harmful practices inpatient	Provision	Process	Inpatient	15 Prev/unnes/harm	4	4	3	4	3	3	15		0	4	4	3	11		0		0					0	4	4	3	11	No	NOT SELECTED	NOT SELECTED	RIS
	1.15	1	8	MS-2		4. Proportion of children admitted to the health facility who receive blood when not indicated. (80.45)	Processes: EB care, harmful practices, patient-centered practices	Non-evidence-based, harmful practices inpatient	Provision	Process	Inpatient	15 Prev/unnes/harm	4	4	3	3	3	3	14		0	4	4	3	11		0		0					0	4	3	3	10	No	NOT SELECTED	NOT SELECTED	RIS
	1.15	1	9	MS-2		5. Proportion of children up to 5 years seen at the health facility with cough who receive harmful cough remedies for respiratory tract infections. (78.56)	Processes: EB care, harmful practices, patient-centered practices	Non-evidence-based, harmful practices inpatient	Provision	Process	Both	15 Prev/unnes/harm	4	4	4	4	4	4	16		0	4	5	4	13		0		0					0	4	4	3	11	Yes	SELECTED	NOT SELECTED	RIS
	1.15	1	10	MS-2		6. Proportion of children admitted to the health facility for whom there were proven medication errors or hospital-acquired infections. (81.92)	Processes: EB care, harmful practices, patient-centered practices	Non-evidence-based, harmful practices inpatient	Provision	Process	Inpatient	15 Prev/unnes/harm	4	4	3	3	4	4	22		0	4	3	5	12		0		0					0	4	4	3	11	No	NOT SELECTED	NOT SELECTED	RIS		suggest to take out hospital ackquired infection and only measure errors. HAI is covered under standard 1.14
	1.15	1	11	MS-2		7. Proportion of children seen at the health facility who received unnecessary oral or parenteral medicines. (81.27)	Processes: EB care, harmful practices, patient-centered practices	Non-evidence-based, harmful practices inpatient	Provision	Process	Both	15 Prev/unnes/harm	4	2	1	4	2	2	15		0	4	5	4	13		0		0					0	4	4	3	11	Yes	NOT SELECTED	NOT SELECTED	RIS		this indicator is very broad. Need very clear definition to be measurable. Otherwise it is good.
	1.15	1	12	MS-2		8. Proportion of children admitted to the health facility who received antibiotics when not indicated. (83.54)	Processes: EB care, harmful practices, patient-centered practices	Non-evidence-based, harmful practices inpatient	Provision	Process	Both	15 Prev/unnes/harm	4	5	3	4	3	3	16		0	4	4	5	13		0		0					0	4	4	3	11	Yes	SELECTED	NOT SELECTED	RIS		I would suggest to revise this indicator both for inpatient and outpatient not only for inpatient; I suggest to define 2-3 major key conditions at outpatient and inpatient settings and assess antibiotic administration for these conditions only.
	2.1	2	1	MS-4		1. The health facility has standardized, age-appropriate child care registers, clinical records, observation charts and patient cards in place at all times for recording and monitoring all care processes and outcomes. (93.71)	Input Heal&Sys	Standardized medical documentation and forms	Supporting systems	Input Heal&Sys	Both		4	5	3	4	3	4	16		0				0		0	5	5					0	3	3	4	10	Yes	SELECTED	NOT SELECTED	InR
	2.1	2	2	MS-4		2. The health facility has an established storage system for medical records that ensures confidentiality and safety and allows rapid retrieval, access and distribution of patients’ medical records. (93.31)	Input Heal&Sys	Health Information system (medical documentation)	Supporting systems	Input Heal&Sys	Both		4	5	3	4	3	4	16		0				0		0	3	3					0	3	3	4	10	No	NOT SELECTED	NOT SELECTED	InR
	2.1	2	3	MS-4		3. The health facility has a registration system for admissions, discharges, births and deaths that is linked to the national vital registration system at all times. (93.13)	Input Heal&Sys	Health Information system (medical documentation)	Supporting systems	Input Heal&Sys	Both		4	5	3	4	3	4	16		0				0		0	4	4					0	3	3	4	10	No	NOT SELECTED	NOT SELECTED	InR
	2.1	2	4	MS-4		4. The health facility has a standardized system for classifying clinical conditions, diseases and health outcomes, including births and deaths, which is aligned with the ICD. (92.48)	Input Heal&Sys	Health Information system (medical documentation)	Supporting systems	Input Heal&Sys	Both		4	5	3	4	3	4	16		0				0		0	4	4					0	3	3	4	10	No	NOT SELECTED	NOT SELECTED	InR
	2.1	2	5	MS-4		5. The health facility has a system for creating unique identifiers for new patients and locating pre-existing unique identifiers for returning patients. (90.59)	Input Heal&Sys	Health Information system (medical documentation)	Supporting systems	Input Heal&Sys	Both		4	5	4	4	3	4	17		0				0		0	4	4					0	3	3	4	10	No	NOT SELECTED	NOT SELECTED	InR
	2.1	2	6	MS-4		6. The health facility staff receive training and refresher sessions at least once every 12 months on the use of standardized medical records, including birth and death registration, and classification of conditions and diseases in accordance with the ICD. (86.28)	Inputs: Human resources	Human resources: specific non-clinical training	Supporting systems	Input HumRes	Both		4	5	3	4	3	4	16		0				0		0	3	3					0	3	3	4	10	No	NOT SELECTED	NOT SELECTED	Prov
	2.1	2	7	MS-4		7. The health facility has sufficient supplies of the necessary registers, patient medical forms, charts and patient cards (e.g. immunization cards) in stock at all times. (93.49)	Input Heal&Sys	Standardized medical documentation and forms	Supporting systems	Input Heal&Sys	Both		4	5	3	4	3	4	16		0				0		0	4	4					0	3	3	4	10	No	NOT SELECTED	NOT SELECTED	InR
	2.1	2	8	MS-4		1. Proportion of all children currently in the health facility who have a patient identifier and individual clinical medical record. (89.32)	Input Heal&Sys	Quality documentation	Supporting systems	Input Heal&Sys	Both		4	5	3	4	3	4	16		0				0		0	4	4					0	3	3	4	10	No	NOT SELECTED	NOT SELECTED	RIS
	2.1	2	9	MS-4		2. Proportion of medical records in which every entry is dated, timed (24-h clock), legible and signed by the person making the entry. (88.86)	Input Heal&Sys	Quality documentation	Supporting systems	Input Heal&Sys	Both		4	5	3	4	3	4	16		0				0		0	4	4					0	3	3	4	10	No	NOT SELECTED	NOT SELECTED	RIS
	2.1	2	10	MS-4		3. Proportion of all children discharged from the health facility within the past 24 h who had an accurately completed discharge summary of the care provided, outcomes and diagnoses (with ICD codes). (90.23)	Input Heal&Sys	Quality documentation inpatient	Supporting systems	Input Heal&Sys	Inpatient		4	5	3	4	3	4	16		0				0		0	5	5					0	3	3	4	10	Yes	SELECTED	NOT SELECTED	RIS
	2.1	2	11	MS-4		4. Proportion of all births and deaths occurring in the health facility that were appropriately registered in the national vital registration system. (91.36)	Input Heal&Sys	Death notification, review	Supporting systems	Input Heal&Sys	Both		4	5	3	4	3	4	16		0				0		0	5	5					0	5	4	4	13	Yes	SELECTED	CORE	RIS	Quarterly	This is very good indicator, however, very hard to measure.
	2.1	2	12	MS-4		1. Proportion of all medical records that include legible documentation of relevant demographic and clinical information on the child and the process and outcomes of the care provided. (87.80)	Input Heal&Sys	Quality documentation	Supporting systems	Input Heal&Sys	Both		4	5	4	4	3	3	17		0				0		0	5	5					0	3	3	4	10	Yes	SELECTED	NOT SELECTED	RIS
	2.1	2	13	MS-4		2. Proportion of all deaths that occurred in the health facility in the past 3 months that were appropriately recorded, with a correct, complete death notification and the cause of death consistent with the ICD classification. (92.13)	Input Heal&Sys	Quality documentation inpatient	Supporting systems	Input Heal&Sys	Inpatient		4	5	3	4	3	4	16		0				0		0	4	4					0	3	3	4	10	No	NOT SELECTED	NOT SELECTED	RIS
	2.2	2	1	MS-4		1. The health facility has a system with standard operating procedures and protocols for data collection and for checking, validating and analysing relevant indicators to make timely reports and visual charts. (92.61)	Inputs: Operational Guidelines	Operational guidelines, protocols related to cross-cutting supporting systems (management, human resources, health information system, infrastructure, supplies and equipment, health financing, organization of health services)	Supporting systems	Input OperGuide	Both		4	3	4	4	4	4	15		0				0		0	3	3					0	3	3	3	9	No	NOT SELECTED	NOT SELECTED	InR
	2.2	2	2	MS-4		2. Managers, health professionals and support staff in the health facility meet regularly (at least once a month) to review patient care and outcomes for decision-making and monitoring performance. (90.92)	Inputs: QI structures and supporting processes	Routine monitoring of the quality of care	Supporting systems	Input QI	Both		4	4	4	4	4	4	16		0				0		0	5	5					0	3	3	4	10	Yes	SELECTED	NOT SELECTED	InR		Statement 2.2. and Statement 7.3. have similar measures and can be optimyzed
	2.2	2	3	MS-4		3. The health facility managers and community representatives meet regularly (at least every 3 months) to review the health facility statistics and performance and use the recommendations for decision-making. (87.42)	Inputs: QI structures and supporting processes	Routine monitoring of the quality of care	Supporting systems	Input QI	Both		4	4	3	4	4	4	15		0				0		0	5	5					0	3	3	4	10	Yes	NOT SELECTED	NOT SELECTED	InR
	2.2	2	4	MS-4		4. The health facility regularly (at least once a month) reviews paediatric deaths and has mechanisms in place to implement the recommendations of the reviews. (93.46)	Input Heal&Sys	Death notification, review	Supporting systems	Input QI	Both		4	3	4	4	4	4	15		0				0		0	4	4					0	3	3	4	10	No	NOT SELECTED	NOT SELECTED	InR
	2.2	2	5	MS-4		5. Evidence that the health facility analyses and produces monthly visual charts and reports for monitoring performance. (86.67)	Inputs: QI structures and supporting processes	Routine monitoring of the quality of care	Supporting systems	Input Heal&Sys	Both		4	4	4	4	4	4	16		0				0		0	5	5					0	3	3	4	10	Yes	SELECTED	NOT SELECTED	InR
	2.2	2	6	MS-4		1. Number of meetings between health facility management and community representatives in the past 6 months. (82.72)	Inputs: QI structures and supporting processes	Structures, regular meetings and implementation plan for QI	Supporting systems	Input Over&Man	Both		4	4	4	4	3	4	16		0				0		0	4	4					0	3	3	4	10	No	NOT SELECTED	NOT SELECTED	InR
	2.2	2	7	MS-4		2. Proportion of all paediatric deaths that occurred in the health facility in the past 3 months that were reviewed with standard death audit tools. (91.42)	Input Heal&Sys	Death notification, review	Supporting systems	Input QI	Both		4	4	4	4	4	3	16		0				0		0	5	5					0	4	4	5	13	Yes	SELECTED	CORE	InR	Quarterly	1.1. #16 is similar to 2.2. #7 indicator, it is more natural to leave it in standard 2.2; suggest to add pieace on action: death reviewed and action steps with responcible parties defined
	2.2	2	8	MS-4		1. Proportion of all recommendations from paediatric death reviews conducted at the health facility in the past 6 months that were fully implemented. (86.95)	Inputs: QI structures and supporting processes	Adressing gaps in QoC	Supporting systems	Input QI	Both		5	5	3	4	4	3	17		0				0		0	5	5					0	3	3	4	10	Yes	SELECTED	NOT SELECTED	InR
		2	9	MS-4		2. Proportion of monthly reports from the health facility received by the next highest level of administration in the past 6 months. (84.01)	Input Heal&Sys	Reporting	Supporting systems	Input Heal&Sys	Both		3	4	3	4	3	3	14		0				0		0	5	5					0	3	3	4	10	Yes	NOT SELECTED	NOT SELECTED	InR
	2.3	2	1	MS-4		1. The health facility has a functioning, age-appropriate system and procedures in place for collecting information and responding to the perceptions of children and their carers of the services provided. (87.97)	Inputs: Operational Guidelines	Operational guidelines, protocols related to client-centered practices	Supporting systems	Input OperGuide	Both		4	4	3	5	4	4	16		0				0		0	4	4					0	3	3	4	10	No	NOT SELECTED	NOT SELECTED	InR
	2.3	2	2	MS-4		2. The health facility has visual materials to inform children and their carers on how to make a complaint (e.g. a suggestion box) and provide feedback to the health facility. (89.40)	Inputs: Infrastructure, equipment client-centered	Infrastructure for client-centered practices	Supporting systems	Input InfrastMedSupEquip	Both		4	4	3	5	4	4	16		0				0		0	4	4					0	3	3	4	10	No	NOT SELECTED	NOT SELECTED	InR
	2.3	2	3	MS-4		3. Health facility staff (clinical and nonclinical) receive training or orientation in customer service and provision of child- and family-centred care at least once every 12 months. (86.29)	Inputs: Human resources	Human resources: specific non-clinical training	Supporting systems	Input HumRes	Both		4	4	3	5	4	4	16		0				0		0	4	4					0	3	3	4	10	No	NOT SELECTED	NOT SELECTED	Prov
	2.3	2	4	MS-4		1. Proportion of carers of children who are aware of the mechanism for patient complaints and feedback (e.g. suggestion box) in the health facility. (81.05)	Inputs: financing	Providers' awareness on the existing mechanisms for patient feedback	Supporting systems	Input Financing	Both		4	4	3	5	4	4	16		0				0		0	5	5					0	3	3	4	10	Yes	SELECTED	NOT SELECTED	Client
	2.3	2	5	MS-4		2. Proportion of children and/or their carers who participated in patient satisfaction surveys or provided feedback on the services received in the past 3 months. (82.28)	Inputs: management and oversight	Oversight and management on patient-centered practices	Supporting systems	Input Over&Man	Both		4	4	3	5	4	4	16		0				0		0	5	5					0	3	3	4	10	Yes	SELECTED	NOT SELECTED	Client
	2.3	2	6	MS-4		1. Proportion of children and/or their carers who are satisfied with the time they spent waiting for care, the procedures and other processes in the health facility. (84.23)	Outcomes: client/career satisfaction	Satisfaction (client/career)	Supporting systems	Outcome	Both		4	4	3	2	4	4	13		0				0		0	4	4					0	3	3	4	10	No	NOT SELECTED	NOT SELECTED	Client
	2.3	2	7	MS-4		2. Proportion of all complaints from children and/or their carers received by the health facility in the past 6 months that were reviewed and acted upon. (85.38)	Inputs: management and oversight	Oversight and management on patient-centered practices	Supporting systems	Input Over&Man	Both		4	4	3	5	4	4	16		0				0		0	5	5					0	3	3	4	10	Yes	SELECTED	NOT SELECTED	InR
	3.1	3	1			1. The health facility has written, up-to-date clinical protocols and guidelines for prereferral management of all infants, children who require referral. (94.13)	Inputs: Operational Guidelines	Operational guidelines, protocols related to care provision	Supporting systems	Input ClinGuidelin	Both								0		0				0		0		0					0				0	No	NOT SELECTED	NOT SELECTED	InR
	3.1	3	2	MS-5		2. The health facility is equipped with age-appropriate medicines and other supplies for stabilization and prereferral treatment of critically ill children who require referral. (94.09)	Inputs: infrastructure, equipment, supplies clinical condition-specific	Clinical condition-specific medicines, supplies and equipment	Supporting systems	Input InfrastMedSupEquip	Both		4	3	3	4	3	3	14		0				0		0	4	4					0	3	3	4	10	No	NOT SELECTED	NOT SELECTED	InR
	3.1	3	3	MS-5		3. The health facility has at least one health professional on duty at all times who is trained and competent in first aid, emergency triage, assessment and treatment or basic paediatric life support. (92.90)	Inputs: Human resources	Human resources (specific clinincal training)	Supporting systems	Inputs: Human resources	Both	1 ASB/ETAT/Asses/class/full	4	5	3	5	3	3	17		0				0		0	5	5					0	3	3	4	10	Yes	SELECTED	NOT SELECTED	InR		relevant to Standard 1.1. duplicate to Indicator #12
	3.1	3	4	MS-5		4. The professional staff communicate clearly with family members about the condition of their child and about why and where the child will be referred for further care. (82.19)		Organization of care processes (including information exchange, care coordination and referral)	Supporting systems	Process	Both		4	5	2	4	4	4	15		0				0		0	5	5					0	3	3	4	10	Yes	NOT SELECTED	NOT SELECTED	Client
	3.1	3	5	MS-5		1. Proportion of all children who require referral who are given prereferral treatment and transferred within 2 h of arrival at the referring health facility. (88.13)		Organization of care processes (including information exchange, care coordination and referral)	Supporting systems	Process	Both	1 ASB/ETAT/Asses/class/full	4	3	3	4	3	3	14		0				0		0	4	4					0	3	3	4	10	No	NOT SELECTED	NOT SELECTED	RIS		Some measures of 3.1. statement are similar to measures of Quality statement 1.1.
	3.1	3	6	MS-5		2. Proportion of all children with surgical emergencies that require referral to a facility with surgical capacity who were transferred within 2 h of arrival at the referring health facility. (86.12)		Organization of care processes (including information exchange, care coordination and referral)	Supporting systems	Process	Both	12 Surg/injur	4	3	3	4	3	3	14		0				0		0	4	4					0	3	3	4	10	No	NOT SELECTED	NOT SELECTED	RIS
	3.1	3	7	MS-5		3. Proportion of all children who require referral who received appropriate prereferral treatment when indicated. (89.40)	Processes: EB care, harmful practices, patient-centered practices	Compliance with EB care practices outpatient	Supporting systems	Process	Outpatient	1 ASB/ETAT/Asses/class/full	4	5	3	5	3	3	17		0	5	3	5	13		0	5	5					0	3	3	4	10	Yes	SELECTED	NOT SELECTED	RIS
	3.1	3	8	MS-5		1. Proportion of children seen in the health facility within the past 3 months who fulfilled the facility’s criteria for referral and who were actually transferred to a referral facility. (83.43)	Outcomes: referral	Outcome of the referral (Died before/during referral, reached referral facility, refused referral)	Supporting systems	Process	Both		4	3	3	4	3	3	14		0				0	4	4	4	4					0	3	3	4	10	Yes	NOT SELECTED	NOT SELECTED	RIS
	3.1	3	9	MS-5		2. Proportion of all children with an indication that requires referral who died at the health facility. (88.30)	Outcomes: referral	Outcome of the referral (Died before/during referral, reached referral facility, refused referral)	Supporting systems	Outcome	Both		4	5	3	5	3	3	17		0				0		0	5	5					0	3	3	4	10	Yes	SELECTED	NOT SELECTED	RIS		Indicator #9 and #10 are similar. Suggesting #9 as it is difficult to determine the cause of death without further investigation
	3.1	3	10	MS-5		3. Number of children who died as a result of delayed referral. (83.81)	Outcomes: referral	Outcome of the referral (Died before/during referral, reached referral facility, refused referral)	Supporting systems	Outcome	Both		4	5	3	4	3	3	16		0				0		0	4	4					0	3	3	4	10	No	NOT SELECTED	NOT SELECTED	RIS
	3.2	3	1	MS-5		1. The health facility is part of a referral network of facilities in the same geographical area with agreed arrangements. (92.92)	Inputs: management and oversight	Oversight and management on cross-cutting supporting systems	Supporting systems	Input Over&Man	Both		4	4	4	4	3	4	16		0				0		0	3	3					0	3	3	3	9	No	NOT SELECTED	NOT SELECTED	InR
	3.2	3	2	MS-5		2. The health facility has local financial arrangements to ensure that children who cannot be managed at the health facility are referred and transferred with their parent or caregiver without delay, 24 h a day, 7 days a week. (86.82)	Inputs: financing	Financing of cross-cutting supporting systems (energy, fuel for vehicles)	Supporting systems	Input Financing	Both		4	4	4	4	3	4	16		0				0		0	4	4					0	3	3	3	9	No	NOT SELECTED	NOT SELECTED	InR
	3.2	3	3	MS-5		3. The health facility has a functioning vehicle with fuel or proximate access to a vehicle that is routinely available for emergency transport to referral facilities. (92.78)	Inputs: Infrastructure, equipment, supplies cross-cutting	Transport	Supporting systems	Input InfrastMedSupEquip	Both		4	4	3	4	3	4	15		0				0		0	4	4					0	3	3	3	9	No	NOT SELECTED	NOT SELECTED	InR
	3.2	3	4	MS-5		4. The health facility vehicle is regularly maintained, clean and carries basic consumables, medications and equipment suitable for resuscitation and supportive care of children of all ages. (88.68)	Inputs: Infrastructure, equipment, supplies cross-cutting	Transport	Supporting systems	Input InfrastMedSupEquip	Both		4	4	3	4	3	4	15		0				0		0	4	4					0	3	3	3	9	No	NOT SELECTED	NOT SELECTED	InR
	3.2	3	5	MS-5		1. Proportion of children who were referred without appropriate emergency transport. (81.24)	Inputs: Infrastructure, equipment, supplies cross-cutting	Transport	Supporting systems	Input InfrastMedSupEquip	Both		4	4	3	5	4	4	16		0				0		0	5	5					0	3	3	3	9	Yes	SELECTED	NOT SELECTED	Client
	3.2	3	6	MS-5		2. Proportion of children referred from the health facility whose families or carers contributed financially to their referral transport. (74.52)	Inputs: financing	Financing of cross-cutting supporting systems (energy, fuel for vehicles)	Supporting systems	Input Financing	Both		4	4	3	4	4	4	15		0				0		0	4	4					0	3	3	3	9	No	NOT SELECTED	NOT SELECTED	Client
	3.2	3	7	MS-5		3. Proportion of all severely ill children who required referral who were transferred to a receiving facility accompanied by a health care professional. (74.12)	Inputs: Organization and availability of health services	Organization of care processes (including information exchange, care coordination and referral)	Supporting systems	Process	Outpatient		4	4	3	4	3	4	15		0				0		0	4	4					0	3	3	3	9	No	NOT SELECTED	NOT SELECTED	InR
	3.2	3	8	MS-5		4. Proportion of children referred to a referral health facility or their carers who reported receiving immediate attention (within 15 min) on arrival at the referral health facility. (80.07)	Inputs: Organization and availability of health services	Organization of care processes inpatient (including information exchange, care coordination and referral)	Supporting systems	Process	Inpatient		4	4	3	5	3	4	16		0				0		0	5	5					0	3	3	3	9	Yes	SELECTED	NOT SELECTED	Client
	3.2	3	9	MS-5		1. Proportion of children who died before or during transfer to a higher-level facility for further management. (89.68)	Outcomes: referral	Outcome of the referral (Died before/during referral, reached referral facility, refused referral)	Supporting systems	Outcome	Both		4	4	3	5	3	4	16		0				0		0	4	4					0	3	3	3	9	No	NOT SELECTED	NOT SELECTED	RIS		This indicator is similar to quality statement 3.1. indicator #9 and #10. suggest to optimyze accordingly
	3.2	3	10	MS-5		2. Proportion of newborns referred from the facility who reached the referral facility. (87.06)	Outcomes: referral	Outcome of the referral (Died before/during referral, reached referral facility, refused referral)	Supporting systems	Outcome	Both		4	4	3	5	3	4	16		0				0		0	5	5					0	3	3	3	9	Yes	SELECTED	NOT SELECTED	InR		maybe we could add timinng: within 2 hours (if feasible)
	3.2	3	11	MS-5		3. Proportion of all children referred from the health facility who completed their referral. (86.23)	Outcomes: referral	Outcome of the referral (Died before/during referral, reached referral facility, refused referral)	Supporting systems	Outcome	Both		4	4	3	5	3	4	16		0				0		0	4	4					0	3	3	3	9	No	NOT SELECTED	NOT SELECTED	InR
	3.2	3	12	MS-5		4. Proportion of all children referred from the health facility whose families refused referral (80.77)	Outcomes: referral	Outcome of the referral (Died before/during referral, reached referral facility, refused referral)	Supporting systems	Outcome	Both		4	4	3	5	3	4	16		0				0		0	4	4					0	3	3	3	9	No	NOT SELECTED	NOT SELECTED	Client
	3.3	3	1	MS-5		1. The health facility has a standardized referral form to document relevant demographic and clinical information (summary of history, clinical findings, investigations, diagnosis and treatment given) and the reason for referral. (94.99)	Input Heal&Sys	Health Information system (referral note, communication)	Supporting systems	Input Heal&Sys	Both		4	3	4	3	4	4	14		0				0		0	4	4					0	3	3	3	9	No	NOT SELECTED	NOT SELECTED	InR
	3.3	3	2	MS-5		2. The health facility has reliable methods of communication (mobile phone, landline or radio) that are functioning at all times for facilitating referrals. (93.13)	Inputs: Infrastructure, equipment, supplies cross-cutting	Supplies and equipment cross-cutting (essential medicines)	Supporting systems	Inputs: Infrastructure, equipment, supplies cross-cutting	Both		4	3	4	3	4	4	14		0				0		0	4	4					0	3	3	3	9	No	NOT SELECTED	NOT SELECTED	InR
	3.3	3	3	MS-5		3. The health facility has formal agreements, communication arrangements and a feedback system with the network referral facilities. (88.25)	Inputs: Organization and availability of health services	Organization of care processes (including information exchange, care coordination and referral)	Supporting systems		Both		4	3	4	3	4	4	14		0				0		0	4	4					0	3	3	3	9	No	NOT SELECTED	NOT SELECTED	InR
	3.3	3	4	MS-5		1. Proportion of all children referred by a health facility for whom written counter-referral feedback information was provided by the receiving facility. (84.60)	Input Heal&Sys	Health Information system (referral note, communication)	Supporting systems	Input Heal&Sys	Both		4	4	3	5	4	4	16		0				0		0	5	5					0	3	3	3	9	Yes	SELECTED	NOT SELECTED	RIS
	3.3	3	5	MS-5		2. Proportion of all children referred for whom there were documented prereferral communications (verbal, written) with the receiving facility. (85.63)	Input Heal&Sys	Health Information system (referral note, communication)	Supporting systems	Input Heal&Sys	Both		4	5	3	4	3	4	16		0				0		0	5	5					0	3	3	3	9	Yes	SELECTED	NOT SELECTED	RIS
	3.3	3	6	MS-5		1. Proportion of all children referred who had an appropriate referral note. (89.04)	Input Heal&Sys	Health Information system (referral note, communication)	Supporting systems	Input Heal&Sys	Both		4	5	3	4	4	3	16		0				0		0	5	5					0	3	3	3	9	Yes	SELECTED	NOT SELECTED	RIS		define appropriateness based on presence/absence of following: demographic and clinical information (summary of history, clinical findings, investigations, diagnosis and treatment given) and the reason for referral.
	4.1	4	1	MS-8		1. The health facility has an up-to-date, written policy and provisions to ensure that all staff are identifiable, with name badges, and that they always introduce themselves to children and their carers, state their name and role and use the name of the child or carer when communicating with them. (90.31)	Inputs: Operational Guidelines	Operational guidelines, protocols related to client-centered practices	Experience	Input OperGuide	Both		3	4	4	3	4	4	22		0				0		0		0	0	0	0	5	1	3	3	3	9	No	NOT SELECTED	NOT SELECTED	InR
	4.1	4	2	MS-8		2. Health facility policy provides that children and their families are entitled to receive appropriate information about the child’s care and other relevant aspects during their stay in the facility. (92.67)	Inputs: Operational Guidelines	Operational guidelines, protocols related to client-centered practices	Experience	Input OperGuide	Both		4	4	4	3	4	4	15		0				0		0		0	5	0	0	5	2.5	3	3	3	9	Yes	NOT SELECTED	NOT SELECTED	InR
	4.1	4	3	MS-8		3. The health facility provides information materials to children and their families to help them understand the opportunities for engagement, how to participate in their care and the roles of the different members of the health care team. (87.00)	Input Heal&Sys	Health Information system (informed consent, information materials)	Experience	Input Heal&Sys	Both		4	4	4	3	4	3	15		0				0		0		0	5	0	0	5	2.5	3	3	3	9	Yes	NOT SELECTED	NOT SELECTED	InR
	4.1	4	4	MS-8		4. The health facility makes available child-friendly, age-appropriate health information materials that are accessible, in the language(s) relevant to the population and in appropriate formats (e.g audiovisuall or visual material, diagrams, illustrations) to facilitate understanding by children and carers. (88.65)	Input Heal&Sys	Health Information system (informed consent, information materials)	Experience	Input Heal&Sys	Both		4	4	4	3	4	3	15		0				0		0		0	5	0	0	5	2.5	3	3	3	9	Yes	NOT SELECTED	NOT SELECTED	InR
	4.1	4	5	MS-8		5. The health facility has a system for providing information to patients about their medical conditions and their treatment care plan in a way that is understandable to them and allays their doubts and fears. (85.28)	Inputs: Organization and availability of health services	Organization of processes (including communication with patient/careers, ensuring privacy, education, counselling sessions)	Experience	Input OperGuide	Both		4	4	4	3	4	4	15		0				0		0		0	5	0	0	5	2.5	3	3	3	9	Yes	NOT SELECTED	NOT SELECTED	InR
	4.1	4	6	MS-8		6. Health care staff receive training and regular mentoring or refresher training at least every 12 months in fully explaining a condition to children and their carers, giving “bad news” and supporting children and parents in coping with the information given. (91.75)	Inputs: Human resources	Human resources: specific non-clinical training	Experience	Input HumRes	Both		4	4	4	3	4	4	15		0				0		0		0	5	0	0	5	2.5	3	3	3	9	Yes	NOT SELECTED	NOT SELECTED	Prov
	4.1	4	7	MS-8		1. Proportion of health care staff in the health facility wearing identification badges. (84.94)	Inputs: Organization and availability of health services	Organization of processes (including communication with patient/careers, ensuring privacy, education, counselling sessions)	Experience	Input Over&Man	Both		3	4	4	3	4	4	14		0				0		0		0	5	0	0	5	2.5	3	3	3	9	Yes	NOT SELECTED	NOT SELECTED	Obs
	4.1	4	8	MS-8		2. Proportion of health care staff, by cadre and social professionals who received proper continuous training in communication and counselling. (86.84)	Inputs: Human resources	Human resources: specific non-clinical training	Experience	Input HumRes	Both		4	4	4	3	4	4	15		0				0		0		0	5	0	0	5	2.5	3	3	3	9	Yes	NOT SELECTED	NOT SELECTED	Prov
	4.1	4	9	MS-8		3. Proportion of health care staff in the health facility who demonstrate good communication skills: asking and listening to children and carers, enabling them to ask questions, explaining with examples to ensure understanding and verifying their understanding. (85.16)	Inputs: Organization and availability of health services	Organization of processes (including communication with patient/careers, ensuring privacy, education, counselling sessions)	Experience	Process	Both		4	4	4	4	4	4	16		0				0		0		0	5	0	0	0	1.5	3	3	3	9	No	NOT SELECTED	NOT SELECTED	Obs
	4.1	4	10	MS-8		4. Proportion of children and their carers who consider that they were given the information they required in a timely, respectful manner. (85.55)	Outcomes: client/career satisfaction	Satisfaction (client/career)	Experience	Outcome	Both		4	4	3	4	4	4	15		0				0		0		0	5	5	0	0	2.5	3	3	3	9	Yes	NOT SELECTED	NOT SELECTED	Client
	4.1	4	11	MS-8		1. Proportion of children and/or carers seen in the outpatient department of the health facility who can correctly state the reason that a particular treatment was given, when to return and how to take the treatment at home. (92.04)	Outcomes: client-centered practices	Knowledge of care provider's name, condition or treatment given outpatient	Experience	Outcome	Outpatient		4	4	3	5	4	4	16		0				0		0		0	5	5	0	5	3.5	5	5	3	13	Yes	SELECTED	CORE	Client	Quarterly
	4.1	4	12	MS-8		2. Proportion of children discharged from the health facility or their carers who were given written instructions about treatment and care at home and can describe correctly how to take or give the discharge treatment at home. (94.02)	Outcomes: client-centered practices	Written/verbal instructions to discharged patients, transfer forms given, consent forms signed inpatient	Experience	Process	Inpatient		4	4	3	5	4	4	16		0				0		0		0	5	5	0	5	3.5	5	5	3	13	Yes	SELECTED	CORE	Client	Quarterly
	4.1	4	13	MS-8		3. Proportion of children and/or their carers who reported that they were satisfied with the quality of the health information and support they received from health care staff during their care. (87.79)	Outcomes: client/career satisfaction	Satisfaction (client/career)	Experience	Outcome	Both		4	4	3	5	4	4	16		0				0		0		0	5	5	0	5	3.5	3	3	3	9	Yes	SELECTED	NOT SELECTED	Client
	4.2	4	1	MS-8		1. The health facility has a written, up-to-date, structured, standard form to facilitate written hand-over of patients among caring teams at shift changes or during transfer among facilities. (94.89)		Operational guidelines, protocols related to care provision inpatient	Experience	Input Heal&Sys	Inpatient		4	4	3	4	4	3	15		0				0		0		0	5	0	0	0	1.5	3	3	3	9	No	NOT SELECTED	NOT SELECTED	InR
	4.2	4	2	MS-8		2. The health facility has a functioning communication system for exchanging information among relevant service providers that reaches all critical staff 24 h a day, 7 days a week. (93.20)	Input Heal&Sys	Health Information system (referral note, communication) inpatient	Experience	Input Heal&Sys	Inpatient		4	4	3	4	4	3	15		0				0		0		0	5	0	0	0	1.5	3	3	3	9	No	NOT SELECTED	NOT SELECTED	Prov
	4.2	4	3	MS-8		3. Staff who care for children receive orientation or refresher sessions in clinical hand-over policy and communication at least once every 12 months. (93.73)	Inputs: Human resources	Human resources: specific non-clinical training	Experience	Input HumRes	Both		4	4	3	4	4	3	15		0				0		0		0	5	0	0	0	1.5	3	3	3	9	No	NOT SELECTED	NOT SELECTED	InR
	4.2	4	4	MS-8		1. Proportion of clinical records that demonstrate that all correspondence about investigations and clinical interventions received were reviewed by health care staff, signed and acted upon in a timely manner. (89.00)	Input Heal&Sys	Health Information system (referral note, communication) inpatient	Experience	Input Heal&Sys	Inpatient		4	4	3	4	4	3	15		0				0		0		0	5	0	0	0	1.5	3	3	3	9	No	NOT SELECTED	NOT SELECTED	RIS
	4.2	4	5	MS-8		2. Proportion of children admitted to the health facility for whom there is an up-to-date, appropriately completed monitoring chart that indicates that vital signs were monitored regularly. (97.97)	Input Heal&Sys	Quality documentation inpatient	Experience	Input Heal&Sys	Inpatient	13 Support/Sick	4	4	3	5	4	3	16		0				0		0		0	0	0	5	5	2.5	3	3	3	9	Yes	SELECTED	NOT SELECTED	RIS		This indicator is also relevant to standard 1.13 routine monitoring of the sick children in hospital
	4.2	4	6	MS-8		3. Proportion of all children admitted to the health facility or their carers who know their primary health care provider by name. (80.33)	Outcomes: client/career knowledge	Knowledge of care provider's name, condition or treatment given inpatient	Experience	Outcome	Both		4	4	3	4	4	3	15		0				0		0		0	0	5	0	5	2	3	3	3	9	No	NOT SELECTED	NOT SELECTED	Client
	4.2	4	7	MS-8		1. Proportion of children or their carers who express satisfaction with the information shared and the continuity of care received from different health care providers. (92.19)	Outcomes: client/career satisfaction	Satisfaction (client/career) inpatient	Experience	Outcome	Both		4	4	3	4	4	4	23		0				0		0		0	5	5	0	0	2.5	3	3	3	9	Yes	SELECTED	NOT SELECTED	Client
	4.2	4	8	MS-8		2. Proportion of health care staff, by cadre, who are satisfied that the information in daily patient notes ensures understanding of current diagnoses, the treatment plan and planned or pending investigations. (86.84)	Inputs: Human resources	Satisfaction (staff/providers) inpatient	Experience	Input HumRes	Inpatient		4	4	3	5	3	4	23		0				0		0		0	0	0	5	5	2.5	3	3	3	9	Yes	SELECTED	NOT SELECTED	Prov
	4.2	4	9	MS-8		3. Proportion of paediatric transfers within the facility for which there is a complete transfer form with clinical notes, including timely reception of diagnostic test results for transferred patients. (91.40)	Input Heal&Sys	Health Information system (informed consent, information materials) inpatient	Experience	Input Heal&Sys	Inpatient		4	4	3	5	3	4	23		0				0		0		0	0	0	5	5	2.5	3	3	3	9	Yes	SELECTED	NOT SELECTED	RIS
	4.3	4	1	MS-8		1. The health facility has up-to-date protocols, guidelines and job aides for providing information to children and their carers about the purpose, importance, benefits, risks and possible costs of proposed investigations, referrals or treatments. (88.32)	Inputs: Operational Guidelines	Operational guidelines, protocols related to client-centered practices	Experience	Input OperGuide	Both		4	4	4	3	4	4	15		0				0		0		0	5	0	0	0	1.5	3	3	3	9	No	NOT SELECTED	NOT SELECTED	InR
	4.3	4	2	MS-8		2. The health facility has an up-to-date “clients’ charter” that states the policies for child- and family-centred care, guidance on confidentiality and the practice and culture of family presence during clinical examinations, procedures and treatment of children. (91.37)	Inputs: Operational Guidelines	Operational guidelines, protocols related to client-centered practices	Experience	Input OperGuide	Both		4	4	4	3	4	4	15		0				0		0		0	0	0	0	5	1	3	3	3	9	No	NOT SELECTED	NOT SELECTED	InR
	4.3	4	3	MS-8		3. The health facility has appropriate forms for patients, parents or carers to sign in order to give their consent to procedures, investigations and treatment. When consent is given orally, this is registered on the patient’s chart. (92.16)	Input Heal&Sys	Health Information system (informed consent, information materials)	Experience	Input Heal&Sys	Both		4	4	4	3	4	4	15		0				0		0		0	5	0	0	5	2.5	3	3	3	9	Yes	NOT SELECTED	NOT SELECTED	InR
	4.3	4	4	MS-8		4. The health facility has various visual resources (e.g. models, charts, posters, videos, electronic material) in the consulting room for use by clinical staff and other health professionals to provide explanations to children and their carers. (88.22)	Input Heal&Sys	Health Information system (informed consent, information materials)	Experience	Input Heal&Sys	Both		4	4	4	3	4	4	15		0				0		0		0	5	0	0	5	2.5	3	3	3	9	Yes	NOT SELECTED	NOT SELECTED	InR
	4.3	4	5	MS-8		5. Staff who care for children receive orientation or training in patient-centred care and legal and medical ethical principles of autonomy, informed consent, confidentiality and privacy at least once every 12 months. (88.70)	Inputs: Human resources	Human resources: specific non-clinical training	Experience	Input HumRes	Both		4	4	4	3	4	4	15		0				0		0		0	0	0	5	5	2.5	3	3	3	9	Yes	NOT SELECTED	NOT SELECTED	Prov
	4.3	4	6	MS-8		1. Proportion of children or their carers who were informed about their right to express their views and participate in making decisions about their care. (87.20)	Inputs: Organization and availability of health services	Organization of processes (including communication with patient/careers, ensuring privacy, education, counselling sessions)	Experience	Process	Both		4	4	4	3	4	4	15		0				0		0		0	0	5	0	5	2	3	3	3	9	No	NOT SELECTED	NOT SELECTED	Client
	4.3	4	7	MS-8		2. Proportion of parents or carers in the health facility who were offered the option and were present with their child during medical procedures. (88.63)	Inputs: Organization and availability of health services	Written/verbal instructions to discharged patients, transfer forms given, consent forms signed	Experience	Process	Inpatient		4	4	4	3	4	4	15		0				0		0		0	0	5	0	5	2	3	3	3	9	No	NOT SELECTED	NOT SELECTED	RIS		This indicator can be combined together with Ind #10
	4.3	4	8	MS-8		1. Proportion of children and/or their carers who considered that their views had been taken into consideration or sought in making decisions about their care. (83.21)		Written/verbal instructions to discharged patients, transfer forms given, consent forms signed	Experience	Outcome	Both		4	4	4	4	4	4	16		0				0		0		0	5	5	0	5	3.5	4	3	3	10	Yes	SELECTED	NOT SELECTED	Client
	4.3	4	9	MS-8		2. Proportion of children of legal age in the health facility who gave documented informed consent for procedures or treatment provided. (88.30)	Outcomes: client/career satisfaction	Satisfaction (client/career)	Experience	Outcome	Inpatient		4	3	4	5	3	3	16		0				0		0		0	5	5	0	5	3.5	4	3	3	10	Yes	SELECTED	NOT SELECTED	Client
	4.3	4	10	MS-8		3. Proportion of parents or caregivers who gave their informed, documented consent for procedures and treatment of their children. (91.15)	Inputs: Organization and availability of health services	Written/verbal instructions to discharged patients, transfer forms given, consent forms signed	Experience	Outcome	Both		4	4	4	4	4	4	16		0				0		0		0	5	5	0	5	3.5	4	3	3	10	Yes	SELECTED	NOT SELECTED	RIS		This indicator can be combined together with Ind #7
	4.4	4	1	MS-8		1. The health facility has information materials for distribution to children and carers about common conditions, promoting and supporting appropriate feeding and nutrition and promoting disease prevention, including hygiene and sanitation practices. (90.54)	Input Heal&Sys	Health Information system (informed consent, information materials)	Experience	Input Heal&Sys	Both		4	3	4	4	3	3	15		0				0		0		0	5	0	0	0	1.5	4	3	3	10	No	NOT SELECTED	NOT SELECTED
	4.4	4	2	MS-8		2. The health facility provides a booklet for the health record of each child at birth or at the first visit to the health facility, which is kept by a parent or carer and used by health providers to document relevant information. (95.29)	Input Heal&Sys	Health Information system (informed consent, information materials)	Experience	Input Heal&Sys	Both		4	3	4	4	3	4	15		0				0		0		0	5	0	0	0	1.5	4	3	3	10	No	NOT SELECTED	NOT SELECTED	Client
	4.4	4	3	MS-8		3. The health facility holds regular “well-being clinics” (e.g. well-child and immunization clinics, counselling services, growth and development monitoring clinics, adolescent clinics), which are used as opportunities for health promotion and preventive care. (94.18)	Inputs: Organization and availability of health services	Organization of processes (including communication with patient/careers, ensuring privacy, education, counselling sessions)	Experience	Input OrgCare	Both		4	3	4	4	3	4	15		0				0		0		0					0	4	3	3	10	No	NOT SELECTED	NOT SELECTED	InR
	4.4	4	4	MS-8		4. The health facility has a system for detecting whether a child has missed a vaccination and offers “catch-up” vaccination within the national immunization programme, according to WHO guidelines. (91.26)	Inputs: Organization and availability of health services	Organization of care processes outpatient (including information exchange, care coordination and referral)	Experience	Input OrgCare	Outpatient		4	3	4	4	3	4	15		0				0		0		0					0	4	3	3	10	No	NOT SELECTED	NOT SELECTED	RIS
	4.4	4	5	MS-8		5. The health facility has an effective system for implementing community-based activities to promote children’s health and well-being. (85.86)	Inputs: management and oversight	Oversight and management on cross-cutting supporting systems outpatient	Experience	Input Over&Man	Outpatient		4	3	4	4	3	3	15		0				0		0		0					0	4	3	3	10	No	NOT SELECTED	NOT SELECTED	InR
	4.4	4	6	MS-8		1. Proportion of children or their parents or carers who attended at least one health education or promotion session at the health facility. (82.46)	Inputs: Organization and availability of health services	Organization of processes outpatient (including communication with patient/careers, ensuring privacy, education, counselling sessions)	Experience	Process	Outpatient		4	3	4	4	4	4	15		0				0		0		0					0	4	3	3	10	No	NOT SELECTED	NOT SELECTED	InR
	4.4	4	7	MS-8		2. Proportion of children under 2 years of age whose parents or carers were counselled and received information about breastfeeding, complementary foods and feeding practices during the current illness. (91.48)	Inputs: Organization and availability of health services	Organization of processes (including communication with patient/careers, ensuring privacy, education, counselling sessions)	Experience	Process	Both		4	4	3	4	3	4	15		0				0		0		0	5	5	0	0	2.5	4	3	3	10	Yes	NOT SELECTED	NOT SELECTED	Client
	4.4	4	8	MS-8		3. Proportion of children with chronic diseases for whom regular follow-up is routinely scheduled and documented in the health facility records. (90.29)	Inputs: Organization and availability of health services	Organization of processes outpatient (including communication with patient/careers, ensuring privacy, education, counselling sessions)	Experience	Process	Both	6 RCEB/Nutr/Growth	3	5	4	4	3	4	16		0				0		0		0	5	0	0	5	2.5	4	3	3	10	Yes	SELECTED	NOT SELECTED	Client
	4.4	4	9	MS-8		4. Proportion of adolescents seen individually by a health professional without the presence of a parent. (80.13)	Inputs: Organization and availability of health services	Organization of processes (including communication with patient/careers, ensuring privacy, education, counselling sessions)	Experience	Process	Outpatient	10 ASB/Chronic/Con	4	4	3	4	4	4	15		0				0		0		0	0	0	0	5	1	4	3	3	10	No	NOT SELECTED	NOT SELECTED	Client
	4.4	4	10	MS-8		1. Proportion of all children whose vaccination card or history indicates that their vaccination is not complete who leave the health facility with all the necessary vaccinations. (92.64)	Impact/No disease-specific care outcomes	Impact outpatient ( e.g full vaccination)	Experience	Outcome	Both		4	4	3	4	4	3	15		0				0		0		0	5	5	0	0	2.5	5	5	3	13	Yes	NOT SELECTED	NOT SELECTED	Client		let's see if there is any other way to monitor up-to-date on vaccination
	4.4	4	11	MS-8		2. Proportion of children under 5 years whose carers are advised to give them extra fluid and to continue feeding. (80.15)	Processes: EB care, harmful practices, patient-centered practices	Compliance with EB care practices	Experience	Process	Both	6 RCEB/Nutr/Growth	4	4	3	4	3	3	15		0	5	5	3	13		0		0	5	5	0	0	2.5	4	4	3	11	Yes	NOT SELECTED	NOT SELECTED	Obs
	4.4	4	12	MS-8		3. Proportion of children or carers who received targeted health information or counselling for the condition of their child, including malnutrition, obesity, mental health or substance abuse. (85.68)	Inputs: Organization and availability of health services	Written/verbal instructions to discharged patients, transfer forms given, consent forms signed	Experience	Process	Both		4	4	3	5	3	3	16		0				0		0		0	5	5	0	0	2.5	4	4	3	11	Yes	SELECTED	NOT SELECTED	Client
	4.4	4	13	MS-8		4. Proportion of all children with diarrhoea whose carers know how to prepare and administer ORS, give extra fluids, continue feeding and recognize danger signs.	Outcomes: client/career knowledge	Knowledge to prepare ORS, danger signs etc	Experience	Outcome	Both		4	4	3	5	3	3	16		0				0		0		0	5	5	0	0	2.5	4	4	3	11	Yes	SELECTED	NOT SELECTED	Client		Content-specific patient-centered outcome
	5.1	5	1	MS-9		1. The health facility has adopted and implements a policy that guarantees free or affordable health care for all children, in accordance with and as defined by national legal or regulatory frameworks. (94.87)	Inputs: management and oversight	Oversight and management on patient-centered practices	Experience	Input Over&Man	Both		3	4	4	3	4	4	14		0				0		0		0	0	0	0	5	1	3	3	3	9	No	NOT SELECTED	NOT SELECTED	InR
	5.1	5	2	MS-9		2. The health facility has adopted and implements a policy that guarantees nondiscrimination of any kind against children or their carers in the provision of care, including poor, vulnerable and disabled children. (90.44)	Inputs: management and oversight	Oversight and management on patient-centered practices	Experience	Input Over&Man	Both		3	4	4	3	4	4	14		0				0		0		0	0	0	5	5	2.5	3	3	3	9	Yes	NOT SELECTED	NOT SELECTED	InR
	5.1	5	3	MS-9		3. The health facility has measures and facilities in place to ensure that children with disabilities or developmental delay have full physical access to all the facilities and services they require, including sanitation and recreation facilities. (93.40)	Inputs: Infrastructure, equipment client-centered	Infrastructure for client-centered practices	Experience	Input InfrastMedSupEquip	Both		4	4	3	5	4	4	16		0				0		0		0	0	0	5	5	2.5	3	3	3	9	Yes	SELECTED	NOT SELECTED	InR		similar to indicator # 6
	5.1	5	4	MS-9		4. The health facility staff receive training and periodic refresher courses on nondiscrimination practices, promoting equity and cultural competence. (87.38)	Inputs: Human resources	Human resources: specific non-clinical training	Experience	Input HumRes	Both		4	4	4	3	4	4	15		0				0		0		0	0	0	5	5	2.5	3	3	3	9	Yes	NOT SELECTED	NOT SELECTED	Prov
	5.1	5	5	MS-9		1. Proportion of children and their parents or carers who were exempted from out-of-pocket payment for treatment, medicines, interventions and other health care-related costs. (91.41)	Outomes: Access to medicines, services and facilities, financial access to services	Financial access to services	Experience	Outcome	Both		4	4	4	3	4	4	15		0				0		0		0	0	0	0	5	1	3	3	3	9	No	NOT SELECTED	NOT SELECTED	Client		Outomes: Access to medicines, services and facilities, financial access to services
	5.1	5	6	MS-9		2. Proportion of children with a disability or their carers who report no physical barriers to accessing services and facilities in the health facility. (90.88)	Inputs: Infrastructure, equipment client-centered	Phisical access to facilities by patients with disabilities	Experience	Input InfrastMedSupEquip	Both		4	4	4	4	4	4	16		0				0		0		0	0	5	0	5	2	3	3	3	9	No	NOT SELECTED	NOT SELECTED	Client		similar to indicator # 3
	5.1	5	7	MS-9		1. Proportion of children and their carers who report any form of discrimination or refusal of care because of their economic, social, religious, linguistic or other status. (88.85)	Outcomes: client-centered practices	Experienced maltreatment, receiving appropriate support and referral for maltreatment	Experience	Outcome	Both		4	4	4	4	4	4	16		0				0		0		0	0	5	5	5	3.5	5	5	3	13	Yes	SELECTED	CORE	Client	Quarterly
	5.1	5	8	MS-9		2. Proportion of children in a minority, migrant or other vulnerable group who were satisfied with the services provided. (83.63)	Outcomes: client/career satisfaction	Satisfaction (client/career)	Experience	Outcome	Both		4	4	4	4	4	4	16		0				0		0		0	0	5	0	5	2	3	3	3	9	No	NOT SELECTED	NOT SELECTED	Client
	5.1	5	9	MS-9		3. Proportion of children who receive care in the health facility whose financial access is mitigated or covered by health insurance. (88.86)	Outomes: Access to medicines, services and facilities, financial access to services	Financial access to services	Experience	Outcome	Both		4	3	4	4	4	4	15		0				0		0		0	0	0	0	5	1	3	3	3	9	No	NOT SELECTED	NOT SELECTED	Client		does not measure the quality of care
	5.2	5	1	MS-9		1. The health facility has an up-to-date charter of children’s rights, in line with the United Nations Convention on the Rights of the Child. (93.49)	Inputs: Operational Guidelines	Operational guidelines, protocols related to client-centered practices	Experience	Input OperGuide	Both		4	3	4	4	4	4	15		0				0		0		0	0	0	0	5	1	3	3	3	9	No	NOT SELECTED	NOT SELECTED	InR
	5.2	5	2	MS-9		2. The health facility visibly displays and makes available information about the charter in leaflets and posters, including child-friendly formats, in all areas in which children are cared for (wards, waiting rooms and play areas). (89.91)	Inputs: management and oversight	Oversight and management on patient-centered practices	Experience	Input Over&Man	Both		4	4	4	4	4	4	16		0				0		0		0	0	0	5	5	2.5	4	3	3	10	Yes	SELECTED	NOT SELECTED	InR
	5.2	5	3	MS-9		3. The health facility promotes awareness-raising events about children’s rights, such as celebrating a children’s day. (82.80)	Inputs: management and oversight	Oversight and management on patient-centered practices	Experience	Input Over&Man	Both		3	3	4	4	4	4	14		0				0		0		0	0	0	0	5	1	3	3	3	9	No	NOT SELECTED	NOT SELECTED	InR
	5.2	5	4	MS-9		4. The charter on children’s rights is integrated into the system for improving the quality of care in the health facility. (83.42)	Inputs: management and oversight	Oversight and management on patient-centered practices	Experience	Input Over&Man	Both		4	4	4	3	4	4	15		0				0		0		0	0	0	5	5	2.5	4	3	3	10	Yes	NOT SELECTED	NOT SELECTED	InR
	5.2	5	5	MS-9		5. The health facility has a team or focal person responsible for overseeing observance of the charter on children’s rights in the health facility. (85.47)	Inputs: management and oversight	Oversight and management on patient-centered practices	Experience	Input Over&Man	Both		4	4	4	4	4	4	16		0				0		0		0	0	0	5	5	2.5	4	3	3	10	Yes	SELECTED	NOT SELECTED	InR
	5.2	5	6	MS-9		1. Proportion of staff in the health facility who care for children who understand the charter on children’s rights and how to apply it in practice. (84.83)	Inputs: Human resources	Human resources: specific non-clinical training	Experience	Input HumRes	Both		4	3	4	4	4	4	15		0				0		0		0	0	0	5	5	2.5	4	3	3	10	Yes	NOT SELECTED	NOT SELECTED	Prov
	5.2	5	7	MS-9		2. Proportion of children or their carers who are told about the charter on children's rights as it pertains to the right to care in an appropriate local language at admission. (82.01)	Inputs: Organization and availability of health services	Provision of regular, safe, nutritious meals, educating mothers how to express breast milk, informing about childrens' rights	Experience	Process	Inpatient		3	4	4	4	3	3	15		0				0		0		0	0	0	5	5	2.5	4	3	3	10	Yes	NOT SELECTED	NOT SELECTED	Client		Indicator 7 and 9 are similar. Best to measure client-reported outcome
	5.2	5	9	MS-9		2. Proportion of children in the health facility who were admitted appropriately on the basis of clinical findings, diagnosis or the severity of the condition. (85.49)	Outcomes: client-centered practices	Experienced maltreatment, receiving appropriate support and referral for maltreatment inpatient	Experience	Process	Inpatient		3	4	3	3	3	3	13		0				0		0		0	0	0	5	5	2.5	4	3	3	10	Yes	NOT SELECTED	NOT SELECTED	RIS
	5.2	5	8	MS-9		1. Proportion of children and their parents or caregivers who consider that they were adequately informed about their rights to care. (85.23)		Provision of regular, safe, nutritious meals, educating mothers how to express breast milk, informing about childrens' rights	Experience	Outcome	Both		4	4	4	4	3	3	16		0				0		0		0	0	5	5	5	3.5	4	3	3	10	Yes	SELECTED	NOT SELECTED	Client
	5.3	5	1	MS-9		1. The health facility has written, up-to-date policies, guidelines and mechanisms to ensure written and verbal confidentiality. (93.00)	Inputs: Operational Guidelines	Operational guidelines, protocols related to client-centered practices	Experience	Input OperGuide	Both		4	4	4	3	3	4	15		0				0		0		0	0	0	5	5	2.5	3	3	3	9	Yes	NOT SELECTED	NOT SELECTED	InR
	5.3	5	2	MS-9		2. The health facility has a policy on children’s right to confidential advice and counselling services without the presence of a parent or carer. (89.91)	Inputs: Operational Guidelines	Operational guidelines, protocols related to client-centered practices	Experience	Input OperGuide	Both		4	4	4	3	3	4	15		0				0		0		0	5	0	0	5	2.5	3	3	3	9	Yes	NOT SELECTED	NOT SELECTED	InR
	5.3	5	3	MS-9		3. The health facility has facilities in which children can be examined with both visual and auditory privacy when required. (93.94)	Inputs: Infrastructure, equipment client-centered	Infrastructure for client-centered practices	Experience	Input InfrastMedSupEquip	Both		4	4	4	4	3	4	23		0				0		0		0	0	0	5	5	2.5	3	3	3	9	Yes	SELECTED	NOT SELECTED	InR
	5.3	5	4	MS-9		4. Health facility staff are trained in providing care with respect for dignity and for maintaining confidentiality during the care of children and have received refresher training at least once in the past 12 months. (87.36)	Inputs: Human resources	Human resources: specific non-clinical training	Experience	Input HumRes	Both		4	4	4	3	4	4	15		0				0		0		0	0	0	5	5	2.5	3	3	3	9	Yes	NOT SELECTED	NOT SELECTED	Prov
	5.3	5	5	MS-9		1. Proportion of health facility health care providers who have attended training or received orientation in respecting and protecting the dignity of children and their carers. (90.73)	Inputs: Human resources	Human resources: specific non-clinical training	Experience	Input HumRes	Both		4	4	4	3	4	4	15		0				0		0		0	0	0	5	5	2.5	3	3	3	9	Yes	NOT SELECTED	NOT SELECTED	Prov
	5.3	5	6	MS-9		1. Proportion of older children cared for in the health facility who were satisfied with the privacy they enjoyed during care. (89.12)	Outcomes: client/career satisfaction	Satisfaction (client/career)	Experience	Outcome	Both		4	4	4	4	4	4	16		0				0		0		0	0	5	5	5	3.5	4	4	4	12	Yes	SELECTED	NOT SELECTED	Client
	5.3	5	7	MS-9		2. Proportion of children and their carers in the health facility who perceived that they were treated with compassion and respect and their dignity was preserved. (90.20)	Outcomes: client/career satisfaction	Satisfaction (client/career)	Experience	Outcome	Both		4	4	4	4	4	4	16		0				0		0		0	0	5	5	5	3.5	4	5	4	13	Yes	SELECTED	CORE	Client	Quarterly
	5.4	5	1	MS-9		1. The health facility has clear mechanisms, procedures and up-to-date national protocols that comply and are consistent with the Convention on the Rights of the Child and legal requirements for protecting children subject to suspected maltreatment. (94.88)	Inputs: Operational Guidelines	Operational guidelines, protocols related to client-centered practices	Experience	Input OperGuide	Both		4	3	3	4	3	3	14		0				0		0		0	0	0	5	5	2.5	3	3	3	9	Yes	NOT SELECTED	NOT SELECTED	InR
	5.4	5	2	MS-9		2. The health facility has protocols, job aides or checklists that provide guidance for staff on detecting, documenting (taking forensic samples, photographs when allowed and forensic examination) and caring for child victims of maltreatment. (95.12)	Inputs: Operational Guidelines	Operational guidelines, protocols related to client-centered practices	Experience	Input OperGuide	Both		4	4	4	4	3	3	16		0				0		0		0	0	0	5	5	2.5	3	3	3	9	Yes	SELECTED	NOT SELECTED	InR
	5.4	5	3	MS-9		3. The health facility has a system for registering and/or monitoring children who have been or are victims of any kind of suspected maltreatment. (92.32)	Input Heal&Sys	Health Information system (registering victims of maltreatment)	Experience	Input Heal&Sys	Both		4	3	4	4	3	3	15		0				0		0		0	0	0	5	5	2.5	3	3	3	9	Yes	NOT SELECTED	NOT SELECTED	InR
	5.4	5	4	MS-9		4. The health facility has clear mechanisms and protocols for sharing appropriate information and concerns with relevant agencies. (92.78)	Inputs: Operational Guidelines	Operational guidelines, protocols related to client-centered practices	Experience	Input OperGuide	Both		4	3	4	4	3	3	15		0				0		0		0	0	0	5	5	2.5	3	3	3	9	Yes	NOT SELECTED	NOT SELECTED	InR
	5.4	5	5	MS-9		5. The health facility has an effective multidisciplinary team and/or responsible person to investigate, care for and provide the necessary appropriate support to children with suspected maltreatment. (90.67)	Inputs: management and oversight	Oversight and management on patient-centered practices	Experience	Input Over&Man	Both		4	4	4	4			16		0				0		0		0	0	0	5	5	2.5	3	3	3	9	Yes	SELECTED	NOT SELECTED	InR
	5.4	5	6	MS-9		6. The health facility staff receive training and orientation in identifying, assessing, communicating with and providing care and support for child victims of any form of maltreatment and on child protection procedures. (92.12)	Inputs: Human resources	Human resources: specific non-clinical training	Experience	Input HumRes	Both		4	3	4	4	3	3	15		0				0		0		0	0	0	5	5	2.5	3	3	3	9	Yes	NOT SELECTED	NOT SELECTED	Prov		this MEASURE IS SIMILAR TO MEASURE #8. THEREFORE, SELECTING JUST ONE, MORE INCLUSIVE
	5.4	5	7	MS-9		1. Number of cases of suspected child maltreatment identified in the health facility in the past 12 months. (90.68)	Outcomes: client-centered practices	Experienced maltreatment, receiving appropriate support and referral for maltreatment	Experience	Process	Both		4	3	4	4	4	4	15		0				0		0		0	0	0	5	5	2.5	3	3	3	9	Yes	NOT SELECTED	NOT SELECTED	RIS
	5.4	5	8	MS-9		2. Proportion of staff who care for children at the health facility who are trained in child protection, care and support. (92.29)	Inputs: Human resources	Human resources: specific non-clinical training	Experience	Input HumRes	Both		4	4	4	4	3	3	16		0				0		0		0	0	0	5	5	2.5	3	3	3	9	Yes	SELECTED	NOT SELECTED	Prov
	5.4	5	9	MS-9		1. Proportion of children identified as victims of maltreatment who received protection, psychological support and appropriate referral. (90.56)	Outcomes: client-centered practices	Experienced maltreatment, receiving appropriate support and referral for maltreatment	Experience	Process	Both		4	5	3	4	3	3	16		0				0		0		0	0	0	5	5	2.5	4	3	3	10	Yes	SELECTED	NOT SELECTED	RIS
	5.5	5	1	MS-9		1. The health facility has a food and nutrition policy and guidelines to meet children’s nutritional needs, including special needs, consistent with dietary requirements. (94.64)	Inputs: Operational Guidelines	Operational guidelines, protocols related to client-centered practices	Experience	Input OperGuide	Inpatient		4	4	4	3	3	3	15		0				0		0		0	0	0	5	5	2.5	3	3	3	9	Yes	NOT SELECTED	NOT SELECTED	InR
	5.5	5	2	MS-9		2. The health facility has an up-to-date, written policy on breastfeeding that adheres to the International Code of Marketing of Breast-milk Substitutes and is routinely communicated to all health care staff. (93.66)	Inputs: Operational Guidelines	Operational guidelines, protocols related to client-centered practices	Experience	Input OperGuide	Inpatient		4	4	4	3	3	3	15		0				0		0		0	0	0	5	5	2.5	3	3	3	9	Yes	NOT SELECTED	NOT SELECTED	InR
	5.5	5	3	MS-9		3. The health facility has an adequately equipped, designated kitchen (area or room) with facilities for food preparation. (92.64)	Inputs: Infrastructure, equipment client-centered	Infrastructure for client-centered practices inpatient	Experience	Input InfrastMedSupEquip	Inpatient		4	4	4	3	3	3	15		0				0		0		0	0	0	5	5	2.5	3	3	3	9	Yes	NOT SELECTED	NOT SELECTED	InR
	5.5	5	4	MS-9		4. The health facility has a dedicated staff (or nutrition specialist) responsible for preparing children’s menus. (91.70)	Inputs: Human resources	Human resources (staff availability) inpatient	Experience	Input HumRes	Inpatient		5	4	4	3	3	3	16		0				0		0		0	0	0	5	5	2.5	3	3	3	9	Yes	SELECTED	NOT SELECTED	InR
	5.5	5	5	MS-9		5. The health facility provides regular, safe, nutritious, appetizing, high-quality meals of sufficient variety to meet the needs of paediatric patients. (87.59)	Inputs: Organization and availability of health services	Provision of regular, safe, nutritious meals inpatient	Experience	Input OrgCare	Inpatient		4	4	4	3	3	3	15		0				0		0		0	0	0	5	5	2.5	3	3	3	9	Yes	NOT SELECTED	NOT SELECTED	InR
	5.5	5	6	MS-9		1. Proportion of health facility staff who received training or orientation on child nutrition, including counselling on breastfeeding, at least once in the past 12 months. (92.02)	Inputs: Human resources	Human resources: specific non-clinical training	Experience	Input HumRes	Both	6 RCEB/Nutr/Growth	4	4	4	3	3	3	15		0				0		0		0	0	0	5	5	2.5	3	3	3	9	Yes	NOT SELECTED	NOT SELECTED	Prov
	5.5	5	7	MS-9		2. Proportion of breastfeeding mothers who report that they were shown how to express breast milk or who were given written information about expressing breast milk. (91.69)	Inputs: Organization and availability of health services	Provision of regular, safe, nutritious meals, educating mothers how to express breast milk, informing about childrens' rights	Experience	Input OrgCare	Both	13 Support/Sick	4	4	4	4	4	4	16		0				0		0		0	0	0	5	5	2.5	3	3	3	9	Yes	SELECTED	NOT SELECTED	Client
	5.5	5	9	MS-9		1. Proportion of children admitted to the health facility who were given food appropriate to their dietary requirements. (87.66)	Inputs: Organization and availability of health services	Provision of regular, safe, nutritious meals inpatient	Experience	Process	Inpatient	13 Support/Sick	4	4	3	4	4	3	15		0				0		0		0	0	0	5	5	2.5	3	3	3	9	Yes	NOT SELECTED	NOT SELECTED	RIS
	5.5	5	8	MS-9		3. Proportion of children and their carers in the health facility who are satisfied with the facility meal service in terms of choice, quantity and number of servings per day. (84.92)	Outcomes: client/career satisfaction	Satisfaction (client/career) inpatient	Experience	Outcome	Inpatient		4	4	4	4	4	3	16		0				0		0		0	0	0	5	5	2.5	3	3	3	9	Yes	SELECTED	NOT SELECTED	Client
	5.5	5	10	MS-9		2. Proportion of young infants under 6 months of age who are exclusively breastfed at discharge from the health facility. (87.53)	Impact/No disease-specific care outcomes	Children under 6 months exclusively breastfed inpatient	Experience	Outcome	Inpatient	13 Support/Sick	4	4	4	3	4	3	22		0				0		0		0	0	0	5	5	2.5	4	4	4	12	Yes	SELECTED	NOT SELECTED	RIS		This can be an impotant measure if we measure it among the babies who were born in the health facility (not discharged yet) or were exclusively breastfed upon admission Indicator # 10 of 5.5.; #6 of of 6.1., #7 of 1.6. and #15 of 1.2. are the same
	6.1	6	1	MS-10		1. The health facility has an up-to-date, family-centred policy on parents’ and carers’ right to stay with their children at all times, including during medical procedures. (90.75)	Inputs: Operational Guidelines	Operational guidelines, protocols related to client-centered practices	Experience	Input OperGuide	Both	15 Prev/unnes/harm	4	4	4	3	4	4	15		0				0		0		0	5	0	0	5	2.5	3	3	3	9	Yes	NOT SELECTED	NOT SELECTED	InR		similar to indicator #2
	6.1	6	2	MS-10		2. The health facility has a rooming-in policy so that parents or carers can stay with their children and provides accommodation close to the child’s bed. (93.06)	Inputs: Operational Guidelines	Operational guidelines, protocols related to client-centered practices inpatient	Experience	Input OperGuide	Both	15 Prev/unnes/harm	4	4	4	3	4	4	15		0				0		0		0	5	0	0	5	2.5	3	3	3	9	Yes	NOT SELECTED	NOT SELECTED	InR		similar to indicator #1
	6.1	6	3	MS-10		3. The health facility has areas where parents or carers can breastfeed, prepare special meals for their children or for themselves and meet family and friends. (90.60)	Inputs: Infrastructure, equipment client-centered	Infrastructure for client-centered practices inpatient	Experience	Input InfrastMedSupEquip	Inpatient		4	3	4	4	4	4	15		0				0		0		0	5	0	0	5	2.5	3	3	3	9	Yes	NOT SELECTED	NOT SELECTED	InR
	6.1	6	4	MS-10		4. The health facility staff receive training and regular mentoring or refresher training in children’s rights, including the right not be separated from their parents, and also in parents' rights and responsibilities. (88.62)	Inputs: Human resources	Human resources: specific non-clinical training	Experience	Input HumRes	Inpatient		4	4	4	3	4	4	15		0				0		0		0	5	0	0	5	2.5	3	3	3	9	Yes	NOT SELECTED	NOT SELECTED	Prov
	6.1	6	5	MS-10		1. Proportion of parents and/or carers who were given the opportunity to room-in with their children. (88.78)	Outcomes: client-centered practices	Room-in or staying with child during medical procedures inpatient	Experience	Outcome	Inpatient		4	3	4	4	4	4	15		0				0		0		0	5	0	0	5	2.5	3	3	3	9	Yes	NOT SELECTED	NOT SELECTED	Client		Similar to indicator #8, which was selected and is more flexible
	6.1	6	6	MS-10		2. Proportion of infants under 6 months of age admitted to the facility who are exclusively breastfeeding or given only expressed breast milk by cup and spoon. (86.42)	Impact/No disease-specific care outcomes	Children under 6 months exclusively breastfed inpatient	Experience	Outcome	Inpatient	13 Support/Sick	3	4	4	4	3	4	15		0				0		0		0	5	0	0	5	2.5	4	3	3	10	Yes	NOT SELECTED	NOT SELECTED	RIS		Indicator # 10 of 5.5.; #6 of of 6.1., #7 of 1.6. and #15 of 1.2. are the same; I have selected it for Standard 5.5.
	6.1	6	7	MS-10		1. Proportion of children in the health facility whose parents or carers stayed with them during medical procedures. (86.57)	Outcomes: client-centered practices	Room-in or staying with child during medical procedures	Experience	Outcome	Both		4	4	4	4	3	4	16		0				0		0		0	5	5	0	5	3.5	3	3	3	9	Yes	SELECTED	NOT SELECTED	Client
	6.1	6	8	MS-10		2. Proportion of children admitted to the health facility whose parents or carers were allowed to room-in or were provided with nearby accommodation at night. (88.54)	Outcomes: client-centered practices	Room-in or staying with child during medical procedures inpatient	Experience	Outcome	Inpatient	13 Support/Sick	4	4	4	4	3	4	16		0				0		0		0	5	5	0	5	3.5	3	3	3	9	Yes	SELECTED	NOT SELECTED	Client
	6.1	6	9	MS-10		3. Proportion of children admitted to the health facility whose parents or carers were provided with food or had access to facilities to prepare food. (88.16)	Outcomes: client-centered practices	Room-in or staying with child during medical procedures inpatient	Experience	Outcome	Inpatient		4	4	4	4	3	4	16		0				0		0		0	5	5	0	5	3.5	3	3	3	9	Yes	SELECTED	NOT SELECTED	Client
	6.2	6	1	MS-10		1. The health facility has a written, up-to-date policy to protect children’s right to play and learn while at the facility. (93.51)	Inputs: Operational Guidelines	Operational guidelines, protocols related to client-centered practices inpatient	Experience	Input OperGuide	Both		3	4	4	4	4	4	15		0				0		0		0	0	0	0	5	1	3	3	3	9	No	NOT SELECTED	NOT SELECTED	InR
	6.2	6	2	MS-10		2. The health facility has a system for meeting the educational and learning needs of school-aged children. (87.95)	Inputs: Operational Guidelines	Operational guidelines, protocols related to client-centered practices inpatient	Experience	Input OperGuide	Inpatient		3	4	4	4	4	4	15		0				0		0		0	0	0	0	5	1	3	3	3	9	No	NOT SELECTED	NOT SELECTED	InR
	6.2	6	3	MS-10		3. The health facility has dedicated spaces for age-appropriate play, which are accessible to all children, including those with a disability. (93.82)	Inputs: Infrastructure, equipment client-centered	Infrastructure for client-centered practices	Experience	Input InfrastMedSupEquip	Inpatient		4	4	4	4	3	4	16		0				0		0		0	5	0	0	5	2.5	3	3	3	9	Yes	SELECTED	NOT SELECTED	InR
	6.2	6	4	MS-10		4. The health facility staff are trained in using various forms of play, including sensory stimulation for young infants. (86.53)	Inputs: Human resources	Human resources: specific non-clinical training	Experience	Input HumRes	Inpatient		3	4	4	4	4	4	15		0				0		0		0	5	0	0	5	2.5	3	3	3	9	Yes	NOT SELECTED	NOT SELECTED	Prov
	6.2	6	5	MS-10		1. Proportion of children in the health facility who were involved in play and recreation provided by the facility within the past 24 h. (75.85)	Inputs: Organization and availability of health services	Organization of processes inpatient (given opportunity to room-in, excluseively reastfeeding/given expressed milk by cup), kids involved in play and recreation	Experience	Process	Inpatient		3	4	4	4	3	4	15		0				0		0		0	5	0	0	5	2.5	3	3	3	9	Yes	NOT SELECTED	NOT SELECTED	Obs
	6.2	6	6	MS-10		2. Proportion of health providers who routinely use play techniques during medical procedures as part of therapeutic care. (78.72)	Processes: EB care, harmful practices, patient-centered practices	Provision of patient-centered practices	Experience	Process	Inpatient		3	4	4	4	3	4	15		0				0		0		0	5	0	0	5	2.5	3	3	3	9	Yes	NOT SELECTED	NOT SELECTED	Prov
	6.2	6	9	MS-10		3. Proportion of children who received play therapy during their most recent medical procedure or treatment. (81.91)	Outomes: Access to medicines, services and facilities	Access to playroom, access to facility's educational program, received play therapy	Experience	Process	Both		4	4	4	4	3	4	16		0				0		0		0	5	0	0	5	2.5	3	3	3	9	Yes	SELECTED	NOT SELECTED	Obs
	6.2	6	7	MS-10		1. Proportion of children who accessed the playroom during their stay in the health facility. (81.00)	Outomes: Access to medicines, services and facilities	Access to playroom, access to facility's educational program, received play therapy inpatient	Experience	Outcome	Inpatient		4	4	4	4	3	4	16		0				0		0		0	5	5	0	5	3.5	3	3	3	9	Yes	SELECTED	NOT SELECTED	Client
	6.2	6	8	MS-10		2. Proportion of children who cannot leave their room who had access to some form of play provided by the health facility or a play therapist. (85.46)	Outomes: Access to medicines, services and facilities	Access to playroom, access to facility's educational program, received play therapy inpatient	Experience	Outcome	Inpatient		4	3	4	4	3	4	15		0				0		0		0	5	5	0	5	3.5	3	3	3	9	Yes	NOT SELECTED	NOT SELECTED	Client
	6.2	6	10	MS-10		4. Proportion of school-aged children who accessed and used the facility’s educational programme during their hospitalization. (85.49)	Outomes: Access to medicines, services and facilities	Access to playroom, access to facility's educational program, received play therapy inpatient	Experience	Outcome	Inpatient		4	4	4	4	3	4	16		0				0		0		0	5	5	0	5	3.5	3	3	3	9	Yes	SELECTED	NOT SELECTED	Client
	6.3	6	1	MS-10		1. The health facility has an up-to-date policy and protocols for the assessment, recognition, prevention and management of pain in infants, children and young adolescents. (94.38)	Inputs: Operational Guidelines	Operational guidelines, protocols related to client-centered practices	Experience	Input OperGuide	Both	13 Support/Sick	3	4	4	4	3	3	15		0				0		0		0	0	0	5	5	2.5	3	3	3	9	Yes	NOT SELECTED	NOT SELECTED	InR
	6.3	6	2	MS-10		2. The health facility has guidelines and tools used by clinical staff in assessing and managing pain in infants, children and young adolescents. (91.91)	Inputs: Clinical Guidelines, protocols, job aides	Clinical condition-specific guidelines, protocols, job aides	Experience	Input ClinGuidelin	Both	13 Support/Sick	3	4	3	4	3	3	14		0				0		0		0	0	0	5	5	2.5	3	3	3	9	Yes	NOT SELECTED	NOT SELECTED	InR
	6.3	6	3	MS-10		3. The health facility uses individual plans for pain treatment or non-pharmacological strategies to reduce pain and relieve distressing symptoms, with the active involvement of children. (87.95)		Provision of patient-centered practices	Experience	Input OperGuide	Both	13 Support/Sick	3	4	3	4	3	3	14		0				0		0		0	0	0	5	5	2.5	3	3	3	9	Yes	NOT SELECTED	NOT SELECTED	Doc
	6.3	6	4	MS-10		4. The health facility has facilities for providing psychological and spiritual support to children who require palliative care and to their families. (88.83)	Inputs: Infrastructure, equipment client-centered	Infrastructure for client-centered practices inpatient	Experience	Input InfrastMedSupEquip	Inpatient	10 ASB/Chronic/Con	3	4	3	4	3	3	14		0				0		0		0	0	0	5	5	2.5	3	3	3	9	Yes	NOT SELECTED	NOT SELECTED	InR
	6.3	6	5	MS-10		5. The health staff receive training and regular refresher courses in assessing, preventing and controlling children’s pain at least once every 12 months. (89.48)	Inputs: Human resources	Human resources (specific clinincal training)	Experience	Input HumRes	Inpatient	13 Support/Sick	3	4	3	4	3	3	14		0				0		0		0	0	0	5	5	2.5	3	3	3	9	Yes	NOT SELECTED	NOT SELECTED	Prov
	6.3	6	6	MS-10		6. The health facility has protocols and procedures in place to support the safe storage and use of pain-control medicines and conducts regular audits of pain management. (91.63)	Inputs: management and oversight	Oversight and management on patient-centered practices	Experience	Input Over&Man	Inpatient	13 Support/Sick	3	4	3	4	3	3	14		0				0		0		0	0	0	5	5	2.5	3	3	3	9	Yes	NOT SELECTED	NOT SELECTED	InR
	6.3	6	7	MS-10		1. Proportion of health professionals in the facility who are aware of the facility’s protocols and procedures for pain management. (90.09)	Inputs: Human resources	Knowledge on pain management in children, inclusion of pain scorecards in the medical records, referred to palliative care	Experience	Input HumRes	Inpatient	13 Support/Sick	3	4	3	4	3	3	14		0				0		0		0	0	0	5	5	2.5	3	3	3	9	Yes	NOT SELECTED	NOT SELECTED	Prov
	6.3	6	8	MS-10		2. Proportion of staff who have received training or refresher training in children’s pain management and palliative care within the past 12 months. (89.57)	Inputs: Human resources	Human resources (specific clinincal training)	Experience	Input HumRes	Inpatient	13 Support/Sick	3	4	3	4	3	3	14		0				0		0		0	0	0	5	5	2.5	3	3	3	9	Yes	NOT SELECTED	NOT SELECTED	Prov
	6.3	6	9	MS-10		3. Proportion of health professionals who know how to perform both pharmacological and non-pharmacological interventions to manage pain in children. (86.26)	Inputs: Human resources	Knowledge on pain management in children, inclusion of pain scorecards in the medical records, referred to palliative care	Experience	Input HumRes	Inpatient	13 Support/Sick	3	4	3	4	3	3	14		0				0		0		0	0	0	5	5	2.5	3	3	3	9	Yes	NOT SELECTED	NOT SELECTED	Prov
	6.3	6	10	MS-10		4. Proportion of children’s clinical records reviewed that include an assessment or a pain score card. (90.92)	Inputs: Human resources	Knowledge on pain management in children, inclusion of pain scorecards in the medical records, referred to palliative care inpatient	Experience	Input HumRes	Both	13 Support/Sick	4	4	4	4	4	4	16		0				0		0		0	0	0	5	5	2.5	3	3	3	9	Yes	SELECTED	NOT SELECTED	RIS
	6.3	6	11	MS-10		5. Proportion of children seen in the health facility in the past 6 months who required palliative care and who received it or were referred to an appropriate centre. (88.10)	Inputs: Human resources	Knowledge on pain management in children, inclusion of pain scorecards in the medical records, referred to palliative care	Experience	Input HumRes	Both	10 ASB/Chronic/Con	4	4	4	4	4	4	16		0				0		0		0	0	0	5	5	2.5	3	3	3	9	Yes	SELECTED	NOT SELECTED	RIS
	6.3	6	12	MS-10		1. Proportion of children who received adequate analgesia after surgery or a painful medical procedure. (90.48)	Processes: EB care, harmful practices, patient-centered practices	Received analgesia after surgery/medical procedure, % carers reported pain management by health workers	Experience	Process	Inpatient	13 Support/Sick	4	4	4	4	4	3	16		0				0		0		0	0	5	5	5	3.5	3	3	3	9	Yes	SELECTED	NOT SELECTED	RIS
	6.3	6	13	MS-10		2. Proportion of parents or carers who reported that their child's pain or symptoms of distress were alleviated by the action of health workers. (84.67)	Patient-centered outcome	Received analgesia after surgery/medical procedure, % carers reported pain management by health workers	Experience	Outcome	Both	13 Support/Sick	4	4	4	4	3	4	16		0				0		0		0	0	5	5	5	3.5	3	3	3	9	Yes	SELECTED	NOT SELECTED	Client		Most of the indicators under 6.3. can be covered under Supportive care of sick babies (standard #1.13) and Standard # 1.10 Chronic conditions (Cancer)
	7.1	7	1	MS-6		1. The health facility has a written, up-to-date staffing policy that defines the staffing criteria and standards, lists the numbers, types and competence (job description) of each staff member and is reviewed regularly according to the work load. (92.50)	Inputs: Operational Guidelines	Operational guidelines, protocols related to cross-cutting supporting systems (management, human resources, health information system, infrastructure, supplies and equipment, health financing, organization of health services)	Supporting systems	Input OperGuide	Both		4	4	3	3	3	3	14		0				0		0	4	4					0	3	3	3	9	No	NOT SELECTED	NOT SELECTED	InR
	7.1	7	2	MS-6		2. The health facility has standard procedures and plans for recruitment, deployment, motivation (recognition and reward scheme) and retention of all staff. (91.42)	Inputs: Operational Guidelines	Operational guidelines, protocols related to cross-cutting supporting systems (management, human resources, health information system, infrastructure, supplies and equipment, health financing, organization of health services)	Supporting systems	Input OperGuide	Both		4	4	3	3	3	3	14		0				0		0	4	4					0	3	3	3	9	No	NOT SELECTED	NOT SELECTED	InR
	7.1	7	3	MS-6		3. The health facility has a written, up-to-date policy on triage and waiting times for emergency and non-emergency consultations and treatment. (91.80)	Inputs: Operational Guidelines	Operational guidelines, protocols related to care provision	Supporting systems	Input OperGuide	Both	1 ASB/ETAT/Asses/class/full	3	4	4	3	4	4	14		0				0		0	4	4					0	3	3	3	9	No	NOT SELECTED	NOT SELECTED	InR
	7.1	7	4	MS-6		4. The health facility has a roster displayed in all areas with the names of staff on duty, the times of their shifts and their specific roles and responsibilities. (91.92)	Input Heal&Sys	Health Information system (crosscutting e.g. duty roster displayed)	Supporting systems	Input Heal&Sys	Both		4	5	3	4	3	3	16		0				0		0	4	4					0	3	3	3	9	No	NOT SELECTED	NOT SELECTED	InR
	7.1	7	5	MS-6		5. The health facility has competent child health care providers available at all times, in sufficient numbers to meet the anticipated work load. (90.60)	Inputs: Human resources	Human resources (staff availability)	Supporting systems	Input HumRes	Both		4	5	3	4	3		16		0				0		0	4	4					0	3	3	3	9	No	NOT SELECTED	NOT SELECTED	InR
	7.1	7	6	MS-6		6. The health facility has a system for access to the staff necessary for the psychosocial, developmental, communication and cultural needs of children at all times. (84.37)	Inputs: management and oversight	Oversight and management on care provision	Supporting systems	Input Over&Man	Both		4	5	3	4	3	3	16		0				0		0	4	4					0	3	3	3	9	No	NOT SELECTED	NOT SELECTED	InR
	7.1	7	7	MS-6		7. The health facility has a clear structure and communication channels to reach staff on duty at all times. (92.01)	Inputs: management and oversight	Oversight and management on care provision	Supporting systems	Input Over&Man	Both		4	5	3	4	3	3	16		0				0		0	4	4					0	3	3	3	9	No	NOT SELECTED	NOT SELECTED	InR
	7.1	7	8	MS-6		1. Proportion of available posts in the health facility that were filled by staff with the necessary competence for the job description to ensure that the facility can provide 24-h service. (88.86)	Inputs: Human resources	Available posts filled, staff oriented, received written job description, mechanism to receive feedback from staff, including performance assessment feedback	Supporting systems	Input HumRes	Both		4	5	3	4	3	3	16		0				0		0	4	4					0	3	3	3	9	No	NOT SELECTED	NOT SELECTED	InR
	7.1	7	9	MS-6		2. Proportion of staff who have been oriented to their functions, roles and responsibilities in the facility or unit to which they are assigned. (87.90)	Inputs: Human resources	Available posts filled, staff oriented, received written job description, mechanism to receive feedback from staff, including performance assessment feedback	Supporting systems	Input HumRes	Both		4	4	3	4	3	3	15		0				0		0	4	4					0	3	3	3	9	No	NOT SELECTED	NOT SELECTED	Prov
	7.1	7	10	MS-6		3. Proportion of children or carers who attended the health facility who reported being attended to within the appropriate time for their condition as per facility policy on triage and waiting times. (82.65)	Outomes: Access to medicines, services and facilities	Clients reported prompt access to staff	Supporting systems	Outcome	Both	1 ASB/ETAT/Asses/class/full	4	5	3	5	3	4	17		0				0		0	5	5					0	4	3	3	10	Yes	SELECTED	NOT SELECTED	Client		Similar to indicator #13
	7.1	7	11	MS-6		4. Proportion of nurses who care for children admitted to the facility who have had paediatric training or in-service medical education in child care. (92.07)	Inputs: Human resources	Human resources (staff clinincal training) inpatient	Supporting systems	Input HumRes	Inpatient		4	4	3	4	3	3	15		0				0		0	4	4					0	3	3	3	9	No	NOT SELECTED	NOT SELECTED	Prov
	7.1	7	12	MS-6		1. Proportion of children in the health facility who were attended by health professionals specifically trained in child health care. (85.84)	Inputs: Human resources	Attended by trained professionals	Supporting systems	Input HumRes	Both		4	5	3	5	3	4	17		0				0		0	5	5					0	4	3	3	10	Yes	SELECTED	NOT SELECTED	Obs		In this indicator, we could unite all nesessary clinical trainings required for provision of QoC. We need to think where/how to unite non-clinical trainings
	7.1	7	13	MS-6		2. Proportion of children and their families who attended the health facility who reported satisfactory, prompt access to appropriate medical and support staff when required. (86.48)	Outomes: Access to medicines, services and facilities	Clients reported prompt access to staff	Supporting systems	Outcome	Both		4	4	3	4	3	3	15		0				0		0	4	4					0	3	3	3	9	No	NOT SELECTED	NOT SELECTED	Client		Similar to indicator #10
	7.1	7	14	MS-6		3. Proportion of health professional and support staff in the health facility who are satisfied with their workload in terms of their roles and responsibilities in the facility or the unit to which they are assigned. (85.06)	Inputs: Human resources	Satisfaction (staff/providers)	Supporting systems	Input HumRes	Both		4	5	3	5	3	4	17		0				0		0	5	5					0	4	3	3	10	Yes	SELECTED	NOT SELECTED	Prov
	7.1	7	15	MS-6		4. Proportion of all health professional staff who care for children in the health facility who left the facility or were transferred during the past 12 months. (80.97)	Inputs: Human resources	Staff retention	Supporting systems	Input HumRes	Both		4	4	2	4			14		0				0		0	4	4					0	3	3	3	9	No	NOT SELECTED	NOT SELECTED	InR
	7.2	7	1	MS-6		1. The health facility has a programme for continuing professional education and attitude and skills development for all child health care professionals and support staff. (91.01)	Inputs: Operational Guidelines	Operational guidelines, protocols related to cross-cutting supporting systems (management, human resources, health information system, infrastructure, supplies and equipment, health financing, organization of health services)	Supporting systems	Input OperGuide	Both		4	4	3	4	3	3	15		0				0		0	4	4					0	4	3	3	10	No	NOT SELECTED	NOT SELECTED	InR
	7.2	7	2	MS-6		2. The health facility periodically appraises all staff, has a mechanism for recognizing good performance and has protocols for staff feedback. (88.91)	Inputs: Human resources	Available posts filled, staff oriented, received written job description, mechanism to receive feedback from staff, including performance assessment feedback	Supporting systems	Input HumRes	Both		4	4	3	4	3	3	15		0				0		0		0					0	4	3	3	10	No	NOT SELECTED	NOT SELECTED	Prov
	7.2	7	3	MS-6		3. The health facility has sufficient numbers of competent, licensed, motivated, regulated child health professionals, with an appropriate skills mix, working in multidisciplinary teams. (88.22)	Inputs: Human resources	Human resources (staff availability)	Supporting systems	Input HumRes	Both		3	4	3	3	2	2	13		0				0		0	4	4					0	4	3	3	10	No	NOT SELECTED	NOT SELECTED	InR
	7.2	7	4	MS-6		4. Health professionals and staff who care for children in the health facility receive in-service training and supportive supervision with regard to the legal entitlements and rights of children in relation to health care. (87.34)	Inputs: Human resources	Human resources: specific non-clinical training	Supporting systems	Input HumRes	Both		4	4	3	4	3	3	15		0				0		0	4	4					0	4	3	3	10	No	NOT SELECTED	NOT SELECTED	Prov		This indicator is repeating
	7.2	7	5	MS-6		5. The health facility provides an enabling, supportive environment for professional staff development, with regular supervision and mentoring. (86.75)	Inputs: QI structures and supporting processes	Clinical supervision	Supporting systems	Input Over&Man	Both		4	4	3	4	3	3	15		0				0		0	4	4					0	4	3	3	10	No	NOT SELECTED	NOT SELECTED	Prov
	7.2	7	6	MS-6		6. The health facility facilitates interprofessional collaborative practice, with clear roles and responsibilities for quality improvement according to the professional scope of practice and the needs for child health care. (81.69)	Inputs: QI structures and supporting processes	Structures, regular meetings and implementation plan for QI	Supporting systems	Input QI	Both		4	4	4	3	4	4	15		0				0		0	4	4					0	4	3	3	10	No	NOT SELECTED	NOT SELECTED	InR
	7.2	7	7	MS-6		1. Proportion of clinical and nonclinical health care staff at the health facility who received a written job description on deployment to the facility. (88.99)	Inputs: Human resources	Available posts filled, staff oriented, received written job description, mechanism to receive feedback from staff, including performance assessment feedback	Supporting systems	Input HumRes	Both		4	4	3	4	4	4	4		0				0		0	4	4					0	4	3	3	10	No	NOT SELECTED	NOT SELECTED	Prov
	7.2	7	8	MS-6		2. Evidence that the health facility has a mechanism in place for soliciting feedback from staff on issues that might affect or improve staff performance. (87.28)	Inputs: Human resources	Available posts filled, staff oriented, received written job description, mechanism to receive feedback from staff, including performance assessment feedback	Supporting systems	Input HumRes	Both		4	4	3	4	3	3	15		0				0		0	4	4					0	4	3	3	10	No	NOT SELECTED	NOT SELECTED	InR
	7.2	7	9	MS-6		3. Proportion of health professionals who care for children who received in-service training and/or refresher sessions within the past 12 months. (90.93)	Inputs: Human resources	Human resources (specific clinincal training)	Supporting systems	Input HumRes	Both		4	5	3	5	3	3	17		0				0		0	5	5					0	4	3	3	10	Yes	SELECTED	NOT SELECTED	Prov		This should be non-clinical training on all respective components highlighted throughout the standards (classified as staff non-clinical training). Clinical training will be in standard 7.1. non-clinical in Standard 7.2
	7.2	7	10	MS-6		4. Number of supervisory visits to the health facility to improve clinical competence and performance in the past 12 months. (89.89)	Inputs: QI structures and supporting processes	Clinical supervision	Supporting systems	Input QI	Both		4	5	4	4	4	4	17		0				0		0	5	5					0	4	3	3	10	Yes	SELECTED	NOT SELECTED	InR		we could specify that we speak here on on-site clinical mentorship and coaching
	7.2	7	11	MS-6		5. Proportion of staff at the health facility who had a performance assessment with feedback at least once in the past 12 months.	Inputs: QI structures and supporting processes	Clinical supervision	Supporting systems	Input Over&Man	Both		4	4	3	4	3	3	15		0				0		0	4	4					0	4	3	3	10	No	NOT SELECTED	NOT SELECTED	Prov
	7.2	7	12	MS-6		6. Proportion of staff who had interactions with professional mentors to ensure clinical competence and improve performance in the past 3 months. (89.94)	Inputs: QI structures and supporting processes	Clinical supervision	Supporting systems	Input QI	Both		4	5	4	4	4	4	17		0				0		0	5	5					0	4	3	3	10	Yes	SELECTED	NOT SELECTED	Prov
	7.2	7	13	MS-6		1. Proportion of all staff at the health facility who could identify and report on at least one activity for improving clinical quality in which they were personally involved in the past 6 months. (82.80)	Inputs: QI structures and supporting processes	Adressing gaps in QoC	Supporting systems	Process	Both		4	4	3	4	4	4	15		0				0		0	4	4					0	4	3	3	10	No	NOT SELECTED	NOT SELECTED	Prov		This is the same as indicator #7.3. # 12
	7.2	7	14	MS-6		2. Proportion of health professionals and support staff who care for children at the health facility whose preceding performance appraisal was satisfactory. (82.44)	Inputs: QI structures and supporting processes	Staff's satisfactory performance	Supporting systems	Outcome	Both		4	4	3	4	4	4	15		0				0		0	4	4					0	3	3	3	9	No	NOT SELECTED	NOT SELECTED	InR
	7.2	7	15	MS-6		3. Proportion of all children and their carers at the health facility who were satisfied with the care and support they received from facility staff. (86.62)	Outcomes: client/career satisfaction	Satisfaction (client/career)	Supporting systems	Outcome	Both		3	5	4	3	4	4	15		0				0		0	4	4					0	3	3	3	9	No	NOT SELECTED	NOT SELECTED	InR		The same as indicator 7.3. #10
	7.2	7	16	MS-6		4. Proportion of all staff at the health facility who reported that they were “highly satisfied” with their job. (84.80)	Inputs: Human resources	Satisfaction (staff/providers)	Supporting systems	Input HumRes	Both		4	4	3	4	4	4	15		0				0		0	4	4					0	3	3	3	9	No	NOT SELECTED	NOT SELECTED	Prov
	7.2	7	17	MS-6		5. Number of improvement projects completed in the past 6 months. (82.39)	Inputs: QI structures and supporting processes	Adressing gaps in QoC	Supporting systems	Input QI	Both		3	3	4	3	3	4	13		0				0		0	4	4					0	3	3	3	9	No	NOT SELECTED	NOT SELECTED	InR
	7.3	7	1	MS-6		1. The health facility has a written, up-to-date leadership structure, with defined roles and responsibilities, standard governing policies and protocols and lines for reporting and accountability. (92.86)	Inputs: Operational Guidelines	Operational guidelines, protocols related to cross-cutting supporting systems (management, human resources, health information system, infrastructure, supplies and equipment, health financing, organization of health services)	Supporting systems	Input OperGuide	Both		4	4	4	3	3	4	15		0				0		0	4	4					0	3	3	3	9	No	NOT SELECTED	NOT SELECTED	InR
	7.3	7	2	MS-6		2. The health facility has a written, up-to-date plan for ensuring patient safety and improvement of the quality of care. (91.91)	Inputs: QI structures and supporting processes	Structures, regular meetings and implementation plan for QI	Supporting systems	Input QI	Both		4	4	4	3	3	4	15		0				0		0	4	4					0	3	3	3	9	No	NOT SELECTED	NOT SELECTED	InR
	7.3	7	3	MS-6		3. The health facility has a system of regular meetings between administrators and health professionals to exchange feedback on the performance of staff and of the facility leadership to ensure quality improvement. (90.44)	Inputs: QI structures and supporting processes	Structures, regular meetings and implementation plan for QI	Supporting systems	Input Over&Man	Both		4	4	4	3	3	4	15		0				0		0	4	4					0	3	3	3	9	No	NOT SELECTED	NOT SELECTED	InR
	7.3	7	4	MS-6		4. The health facility has a team or at least one person designated to champion or lead initiatives for improving the quality of care in the facility. (89.30)	Inputs: QI structures and supporting processes	Structures, regular meetings and implementation plan for QI	Supporting systems	Input QI	Both		4	4	4	3	3	4	15		0				0		0	4	4					0	3	3	3	9	No	NOT SELECTED	NOT SELECTED	InR
	7.3	7	5	MS-6		5. The health facility has a costed, budgeted plan and established mechanisms to support identified activities for quality improvement. (90.88)	Inputs: QI structures and supporting processes	Structures, regular meetings and implementation plan for QI	Supporting systems	Input Over&Man	Both		4	4	4	3	3	4	15		0				0		0	4	4					0	3	3	3	9	No	NOT SELECTED	NOT SELECTED	InR
	7.3	7	8	MS-6		1. Proportion of health facility leaders trained in quality improvement leadership and management, data use and leading change (use of information, enabling behaviour, continuous learning). (89.35)	Inputs: Human resources	Human resources: specific non-clinical training	Supporting systems	Input HumRes	Both		4	4	4	3	3	3	15		0				0		0	4	4					0	3	3	3	9	No	NOT SELECTED	NOT SELECTED	InR		This is above-sote indicator. Would not work at facility level
	7.3	7	6	MS-6		6. The health facility holds at least one meeting a month to review data, monitor performance, make recommendations to address any problems, honour good performance and encourage staff or teams who are struggling to improve quality. (91.36)	Inputs: QI structures and supporting processes	Structures, regular meetings and implementation plan for QI	Supporting systems	Process	Both		4	5	3	5	3	3	17		0				0		0	5	5					0	4	3	3	10	Yes	SELECTED	NOT SELECTED	InR
	7.3	7	7	MS-6		7. The health facility holds at least two meetings a year with stakeholders (e.g. the community, service users, partners) to review its performance, identify problems and make recommendations for joint actions to improve quality. (89.06)	Inputs: QI structures and supporting processes	Structures, regular meetings and implementation plan for QI	Supporting systems	Process	Both		4	4	4	3	3	3	15		0				0		0	4	4					0	4	3	3	10	No	NOT SELECTED	NOT SELECTED	InR
	7.3	7	9	MS-6		2. Evidence that the health facility regularly tracks and monitors performance to improve the quality of care from up-to-date dashboards or performance charts. (91.45)	Inputs: QI structures and supporting processes	Routine monitoring of the quality of care	Supporting systems	Process	Both		4	4	4	5	3	3	17		0				0		0	5	5					0	4	3	3	10	Yes	SELECTED	NOT SELECTED	InR
	7.3	7	12	MS-6		3. Proportion of health professionals who actively participated in a quality improvement activity (meeting, audit, project) in the health facility in the past 12 months (88.59)	Inputs: QI structures and supporting processes	Adressing gaps in QoC	Supporting systems	Process	Both		4	4	4	5	3	3	17		0				0		0	5	5					0	4	3	3	10	Yes	SELECTED	NOT SELECTED	Prov		This is the same as indicator #7.2. # 13
	7.3	7	10	MS-6		1. Proportion of all children and their families who were satisfied with the care and support received from facility staff. (86.53)	Outcomes: client/career satisfaction	Satisfaction (client/career)	Supporting systems	Outcome	Both		4	4	4	3	3	3	15		0				0		0	4	4					0	3	3	4	10	No	NOT SELECTED	NOT SELECTED	Client		The same as indicator 7.2 #15
	7.3	7	11	MS-6		2. Proportion of staff members who gave positive feedback about internal policies and activities for continuous quality improvement, including on-the-job training and personal mentoring. (83.45)	Inputs: Human resources	Satisfaction (staff/providers)	Supporting systems	Outcome	Both		4	4	4	3	3	3	15		0				0		0	4	4					0	3	3	3	9	No	NOT SELECTED	NOT SELECTED	Prov
	8.1	8	1	MS-7		1. The health facility is designed to provide child-friendly, seamless access to dedicated areas for the care of children (neonates, children and young adolescents), which are separate from reception, emergency care, outpatient and inpatient areas or wards. (91.27)	Inputs: Infrastructure, equipment client-centered	Infrastructure for client-centered practices inpatient	Supporting systems	Input InfrastMedSupEquip	Both		4	4	4	4	3	4	16		0				0		0	4	4					0	3	3	3	9	No	NOT SELECTED	NOT SELECTED	InR
	8.1	8	2	MS-7		2. The health facility areas dedicated for children (outpatients and inpatients) are furnished and decorated appropriately for the children’s age and educational and play needs. (91.43)	Inputs: Infrastructure, equipment client-centered	Infrastructure for client-centered practices	Supporting systems	Input InfrastMedSupEquip	Both		4	4	4	4	3	4	16		0				0		0	4	4					0	3	3	3	9	No	NOT SELECTED	NOT SELECTED	InR
	8.1	8	3	MS-7		3. The health facility has a room or a screened-off area in the outpatient department and on wards that is sufficient to ensure normal conversation without being overheard and for examination of children unobserved by other patients. (90.23)	Inputs: Infrastructure, equipment client-centered	Infrastructure for client-centered practices	Supporting systems	Input InfrastMedSupEquip	Both		4	4	4	4	3	4	16		0				0		0	4	4					0	3	3	3	9	No	NOT SELECTED	NOT SELECTED	InR
	8.1	8	4	MS-7		4. The surgical services of the health facility have dedicated recovery and hospitalization areas for children located close to the children’s ward. (89.57)	Inputs: infrastructure, equipment, supplies clinical condition-specific	Clinical condition-specific infrastructure	Supporting systems	Input InfrastMedSupEquip	Inpatient		4	4	4	4	3	4	16		0				0		0	4	4					0	3	3	3	9	No	NOT SELECTED	NOT SELECTED	InR
	8.1	8	5	MS-7		5. The health facility practises and has facilities for rooming-in for mothers or carers with their children 24 h a day. (94.88)	Inputs: Infrastructure, equipment client-centered	Infrastructure for client-centered practices	Supporting systems	Input InfrastMedSupEquip	Inpatient		3	4	4	4	3	4	15		0				0		0	5	5					0	4	4	4	12	Yes	NOT SELECTED	NOT SELECTED	InR		This indicator is being reflected in Standard 6.1. as it is more relevant there
	8.1	8	6	MS-7		6. The health facility is adequately maintained, safe, clean, appropriately lit and well ventilated and ensures privacy for children and their families when required. (93.57)	Inputs: Infrastructure, equipment client-centered	Infrastructure for client-centered practices	Supporting systems	Input InfrastMedSupEquip	Both		4	4	4	4	3	4	16		0				0		0	4	4					0	3	3	3	9	No	NOT SELECTED	NOT SELECTED	InR
	8.1	8	7	MS-7		7. The health facility has a power source (e.g. solar, generator, grid) that can meet all the demands of the facility and associated infrastructure for electricity at all times, with a back-up power source. (95.16)	Inputs: Infrastructure, equipment, supplies cross-cutting	Infrastructure cross-cutting (power source)	Supporting systems	Input InfrastMedSupEquip	both		4	3	4	5	3	4	16		0				0		0	5	5					0	3	3	3	9	Yes	SELECTED	NOT SELECTED	InR
	8.1	8	8	MS-7		8. The heath facility has an energy management plan supported by an adequate budget, maintained by appropriately trained staff and regulated by a competent authority. (86.97)	Inputs: Operational Guidelines	Operational guidelines, protocols related to cross-cutting supporting systems (management, human resources, health information system, infrastructure, supplies and equipment, health financing, organization of health services)	Supporting systems	Input OperGuide	both		4	4	4	4	3	4	16		0				0		0	4	4					0	3	3	3	9	No	NOT SELECTED	NOT SELECTED	InR
	8.1	8	9	MS-7		9. The heath facility has a fuel management plan and a local buffer stock, supported by an adequate budget for all the fuel needs for vehicles, cooking and heating, as relevant and as required, at all times. (88.95)	Inputs: Operational Guidelines	Operational guidelines, protocols related to cross-cutting supporting systems (management, human resources, health information system, infrastructure, supplies and equipment, health financing, organization of health services)	Supporting systems	Input OperGuide	both		4	4	4	4	3	4	16		0				0		0	4	4					0	3	3	3	9	No	NOT SELECTED	NOT SELECTED	InR
	8.1	8	10	MS-7		10. The health facility has sufficient funds and staff for rehabilitation, improvement and continuous operation and maintenance of the facility infrastructure. (88.76)	Inputs: financing	Financing of cross-cutting supporting systems (energy, fuel for vehicles)	Supporting systems	Input Financing	both		4	4	4	4	3	4	16		0				0		0	4	4					0	3	3	3	9	No	NOT SELECTED	NOT SELECTED	InR
	8.1	8	11	MS-7		11. The health facility has sufficient safety measures, including safe windows and doors, operational fire extinguishers for each area and floor, a clearly designed plan of evacuation in case of emergency and sufficient external barriers. (92.21)	Inputs: Infrastructure, equipment, supplies cross-cutting	Infrastructure cross-cutting (power source)	Supporting systems	Input InfrastMedSupEquip	both		4	4	4	4	3	4	16		0				0		0	4	4					0	3	3	3	9	No	NOT SELECTED	NOT SELECTED	InR
	8.1	8	12	MS-7		1. Number of power failures lasting > 2 h during the past month. (86.03)	Inputs: Infrastructure, equipment, supplies cross-cutting	Availability of essential medicines, equipment, power, water and WASH supplies	Supporting systems	Outcome	both		4	4	4	4	3	4	16		0				0		0	4	4					0	3	3	3	9	No	NOT SELECTED	NOT SELECTED	InR
	8.1	8	13	MS-7		1. Proportion of all children and their families who attended the health facility who were satisfied with its cleanliness. (85.85)			Supporting systems	Outcome	both		4	4	4	4	3	4	16		0				0		0	4	4					0	3	3	3	9	No	NOT SELECTED	NOT SELECTED	Client
	8.1	8	14	MS-7		2. Proportion of all children and their families who attended the health facility who were satisfied with the availability of child-friendly amenities for education and play. (84.64)	Outcomes: client/career satisfaction	Clients's satisfaction with WASH, cleanliness, child-friendliness, reccomends the facility to others	Supporting systems	Outcome	both		3	4	4	3	4	4	14		0				0		0	5	5					0	3	3	3	9	Yes	NOT SELECTED	NOT SELECTED	Client
	8.1	8	15	MS-7		3. Proportion of children and their families who attended the health facility who would recommend the health facility to friends and family. (82.79)	Outcomes: client/career satisfaction	Clients's satisfaction with WASH, cleanliness, child-friendliness, reccomends the facility to others	Supporting systems	Outcome	both		4	4	4	4	4	4	16		0				0		0	5	5					0	3	3	3	9	Yes	SELECTED	NOT SELECTED	Client
	8.2	8	1	MS-7		1. The health facility has written, up-to-date protocols and awareness-raising materials (e.g. posters) on cleaning, disinfection, hand hygiene, maintenance of water, sanitation and hygiene facilities and safe waste management. (93.65)	Inputs: Operational Guidelines	Operational guidelines, protocols related to cross-cutting supporting systems (management, human resources, health information system, infrastructure, supplies and equipment, health financing, organization of health services)	Supporting systems	Input OperGuide	both	14 IPC/WASH	4	4	4	3	3	4	15		0				0		0	4	4					0	3	3	3	9	No	NOT SELECTED	NOT SELECTED	Client
	8.2	8	2	MS-7		2. The health facility has a functioning source of safe water located on the premises that is adequate to meet all demands (according to WHO standards), for drinking, personal hygiene, medical interventions (formula, ORS, nutritional supplements and medicines), cleaning, laundry and cooking for use by staff, children and their families. (94.47)	Inputs: Infrastructure, equipment, supplies cross-cutting	Infrastructure/equipment cross-cutting (e.g. WASH)	Supporting systems	Input InfrastMedSupEquip	both	14 IPC/WASH	4	4	4	4	3	4	16		0				0		0	5	5					0	3	3	3	9	Yes	SELECTED	NOT SELECTED	InR		Note: Meg Suggested following revisions: The health facility has a functioning source of improvedsafe water located on the premises that is adequate to meet all demands needs (according to WHO standards), for drinking, personal hygiene, medical interventions (formula, ORS, nutritional supplements and medicines), cleaning, laundry and cooking for use by staff, children and their families. (94.47)
	8.2	8	3	MS-7		3. The health facility has drinking-water stations that are either low or have a stool for easy reach, and small cups are available for children. (87.25)	Inputs: Infrastructure, equipment client-centered	Infrastructure for client-centered practices	Supporting systems	Input InfrastMedSupEquip	both	14 IPC/WASH	4	4	4	3	3	4	15		0				0		0	4	4					0	3	3	3	9	No	NOT SELECTED	NOT SELECTED	InR
	8.2	8	4	MS-7		4. The health facility has leak-proof, covered, labelled waste bins and impermeable sharps containers in every treatment area to allow segregation of waste into three categories: sharps, non-sharps infectious waste and general non-infectious waste. (93.39)	Inputs: Infrastructure, equipment, supplies cross-cutting	Infrastructure/equipment cross-cutting (e.g. WASH)	Supporting systems	Input InfrastMedSupEquip	both	14 IPC/WASH	4	4	4	3	3	4	15		0				0		0	4	4					0	3	3	3	9	No	NOT SELECTED	NOT SELECTED	InR
	8.2	8	5	MS-7		5. The health facility has at least one functioning hand hygiene station per 10 beds, with soap and water or alcohol-based hand rubs, in all wards, at least one of which is accessible to children (i.e. lower or with a stool to reach taps). (92.70)	Inputs: Infrastructure, equipment, supplies cross-cutting	Infrastructure/equipment cross-cutting (e.g. WASH)	Supporting systems	Input InfrastMedSupEquip	Inpatient	14 IPC/WASH	4	4	4	3	4	4	23		0				0		0	5	5					0	3	3	3	9	Yes	SELECTED	NOT SELECTED	InR		reflected in standard 1.14
	8.2	8	6	MS-7		6. The health facility has baths and other hygiene facilities on the premises that are appropriately lit, accessible to people with limited mobility, adapted for use by young children and segregated by sex for older children and carers. (92.01)	Inputs: Infrastructure, equipment client-centered	Infrastructure for client-centered practices	Supporting systems	Input InfrastMedSupEquip	both	14 IPC/WASH	4	4	4	4	3	4	16		0				0		0	4	4					0	3	3	3	9	No	NOT SELECTED	NOT SELECTED	InR
	8.2	8	7	MS-7		7. The health facility has sanitation facilities (e.g. pans, toilets, latrines) on the premises for infants, children and young adolescents that are adapted for their use (with, e.g. smaller seats or latrines, child-sized bed pans), segregated by sex for older children, appropriately lit and accessible to people with limited mobility. (91.44)	Inputs: Infrastructure, equipment client-centered	Infrastructure for client-centered practices	Supporting systems	Input InfrastMedSupEquip	both	14 IPC/WASH	4	4	4	4	3	4	16		0				0		0	5	5					0	3	3	3	9	Yes	SELECTED	NOT SELECTED	InR		Note: Meg suggested following revision of the measure: The health facility has usable sanitation facilities (e.g. pans, toilets, latrines) on the premises for infants, children and young adolescents that are adapted for their use (with, e.g. smaller seats and step stools to reach seat or latrines with smaller drop hole, child-sized bed pans), segregated by sex for older children, appropriately li…
	8.2	8	8	MS-7		8. The health facility that offers surgery has a designated station for preoperative hand scrubbing and adequate supplies of appropriate surgical scrub materials. (95.35)	Inputs: Infrastructure, equipment, supplies cross-cutting	Infrastructure/equipment cross-cutting inpatient (e.g. WASH)	Supporting systems	Input InfrastMedSupEquip	Inpatient	14 IPC/WASH	4	4	4	3	3	4	15		0				0		0	4	4					0	3	3	3	9	No	NOT SELECTED	NOT SELECTED	InR
	8.2	8	9	MS-7		9. The health facility has a dedicated nappy-changing station, with appropriate waste disposal and hand-washing facilities nearby. (88.93)	Inputs: Infrastructure, equipment, supplies cross-cutting	Infrastructure/equipment cross-cutting (e.g. WASH)	Supporting systems	Input InfrastMedSupEquip	both	14 IPC/WASH	4	4	4	3	3	4	15		0				0		0	4	4					0	3	3	3	9	No	NOT SELECTED	NOT SELECTED	InR
	8.2	8	10	MS-7		10. The health facility has sufficient trained, competent staff for cleaning, operating and maintaining water, sanitation, hygiene and health care waste facilities, on site when needed, and clear descriptions of their responsibilities. (91.96)	Inputs: Human resources	Human resources: specific non-clinical training	Supporting systems	Input HumRes	both	14 IPC/WASH	4	4	4	3	3	4	15		0				0		0	4	4					0	3	3	3	9	No	NOT SELECTED	NOT SELECTED	InR
	8.2	8	11	MS-7		11. The health facility has sufficient funds for rehabilitation, improvement and continuous operation and maintenance of water, sanitation, hygiene and waste management infrastructure. (87.86)	Inputs: financing	Financing of cross-cutting supporting systems (energy, fuel for vehicles)	Supporting systems	Input Financing	Both	14 IPC/WASH	4	4	4	3	3	4	15		0				0		0	4	4					0	3	3	3	9	No	NOT SELECTED	NOT SELECTED	InR
	8.2	8	12	MS-7		12. The health facility has adequate laundry facilities, including water, detergent and space for drying. (91.70)	Inputs: Infrastructure, equipment, supplies cross-cutting	Infrastructure/equipment cross-cutting (e.g. WASH)	Supporting systems	Input InfrastMedSupEquip	Both	14 IPC/WASH	4	4	4	3	3	4	15		0				0		0	4	4					0	3	3	3	9	No	NOT SELECTED	NOT SELECTED	InR
	8.2	8	13	MS-7		13. Health facility professionals and support staff and carers are educated and trained in good hygiene, including regular hand-washing after changing nappies, before feeding and after using toilets. (90.87)	Inputs: Human resources	Human resources: specific non-clinical training	Supporting systems	Input HumRes	Both	14 IPC/WASH	4	4	4	3	3	4	15		0				0		0	4	4					0	3	3	3	9	No	NOT SELECTED	NOT SELECTED	Prov
	8.2	8	14	MS-7		14. The health facility has an environmental health management risk plan, with an adequate budget, for managing and improving water, sanitation, hygiene and waste management services, including infection prevention and control. (89.53)	Inputs: Operational Guidelines	Operational guidelines, protocols related to cross-cutting supporting systems (management, human resources, health information system, infrastructure, supplies and equipment, health financing, organization of health services)	Supporting systems	Input OperGuide	Both	14 IPC/WASH	4	4	4	3	3	4	15		0				0		0	4	4					0	3	3	3	9	No	NOT SELECTED	NOT SELECTED	InR
	8.2	8	15	MS-7		15. Health facility staff promote safe hygiene practices in caring for infants, children and young adolescents, including safe disposal and management of children’s faeces (88.40)	Inputs: Infrastructure, equipment, supplies cross-cutting	Availability of essential medicines, equipment, power, water and WASH supplies	Supporting systems	Input InfrastMedSupEquip	Both	14 IPC/WASH	4	4	4	3	3	4	15		0				0		0	4	4					0	3	3	3	9	No	NOT SELECTED	NOT SELECTED	Obs
	8.2	8	16	MS-7		1. Proportion of days in the past 3 months when water from an improved source was not available on the premises. (87.27)	Inputs: Infrastructure, equipment, supplies cross-cutting	Availability of essential medicines, equipment, power, water and WASH supplies	Supporting systems	Input InfrastMedSupEquip	Both	14 IPC/WASH	4	4	3	4	3	4	15		0				0		0	4	4					0	3	3	3	9	No	NOT SELECTED	NOT SELECTED	InR
	8.2	8	17	MS-7		2. Proportion of days in the past 3 months when soap or hand disinfectant were not available. (86.82)	Inputs: Infrastructure, equipment, supplies cross-cutting	Availability of essential medicines, equipment, power, water and WASH supplies	Supporting systems	Input InfrastMedSupEquip	Both	14 IPC/WASH	4	4	3	4	3	4	15		0				0		0	4	4					0	3	3	3	9	No	NOT SELECTED	NOT SELECTED	InR
	8.2	8	18	MS-7		3. Proportion of days per calendar year on which wastes were not safely segregated into at least three bins in the consultation area and sharps and infectious wastes were not treated and disposed of safely. (77.53)	Inputs: Infrastructure, equipment, supplies cross-cutting	Availability of essential medicines, equipment, power, water and WASH supplies	Supporting systems	Input InfrastMedSupEquip	Both	14 IPC/WASH	4	4	3	4	3	4	15		0				0		0	4	4					0	3	3	3	9	No	NOT SELECTED	NOT SELECTED	InR
	8.2	8	19	MS-7		4. Proportion of health facility health professionals and support staff who received training or mentoring in sanitation, hand hygiene and infection prevention and control in the past 6 months. (89.66)	Inputs: Human resources	Human resources: specific non-clinical training	Supporting systems	Input HumRes	Both	14 IPC/WASH	4	4	3	4	3	4	15		0				0		0	4	4					0	3	3	3	9	No	NOT SELECTED	NOT SELECTED	Prov
	8.2	8	21	MS-7		2. Proportion of all health care staff at the health facility who are satisfied with the water, sanitation and waste management services. (86.02)	Inputs: Human resources	Satisfaction (staff/providers)	Supporting systems	Input HumRes	Both	14 IPC/WASH	4	4	4	3	3	4	15		0				0		0	4	4					0	3	3	3	9	No	NOT SELECTED	NOT SELECTED	Prov
	8.2	8	22	MS-7		3. Proportion of children and their families who attended the health facility who observed that the health providers washed their hands or used an alcohol rub before examining them. (77.06)	Outcomes: client-centered practices	Care providers washed hands confirmed by observation from careers	Supporting systems	Process	Both	14 IPC/WASH	4	4	4	4	3	4	16		0				0		0	5	5					0	3	3	3	9	Yes	SELECTED	NOT SELECTED	Client
	8.2	8	20	MS-7		1. Proportion of children and their families at the health facility who are satisfied with the water, sanitation and waste management services. (83.67)	Outcomes: client/career satisfaction	Clients's satisfaction with WASH, cleanliness, child-friendliness, reccomends the facility to others	Supporting systems	Outcome	Both	14 IPC/WASH	4	4	4	3	3	4	15		0				0		0	4	4					0	3	3	3	9	No	NOT SELECTED	NOT SELECTED	Client
	8.3	8	1	MS-7		1. The health facility has functioning, clean, age-appropriate essential equipment and supplies for routine care and management of complications at all times in all areas for child care. (94.01)	Inputs: Infrastructure, equipment, supplies cross-cutting	Supplies and equipment cross-cutting (essential medicines)	Supporting systems	Input InfrastMedSupEquip	Both		4	4	3	5	3	3	16		0				0		0	5	5					0	4	3	3	10	Yes	SELECTED	NOT SELECTED	InR		shell we include laboratory here as well. This is similar to indicator #5 in the same standard
	8.3	8	2	MS-7		2. Equipment user manuals and instructions are available, with laminated job aids on how to operate and use the equipment. (89.57)	Inputs: Operational Guidelines	Operational guidelines, protocols related to care provision	Supporting systems	Input OperGuide	Both		4	4	3	5	3		16		0				0		0	4	4					0	4	3	3	10	No	NOT SELECTED	NOT SELECTED	InR
	8.3	8	3	MS-7		3. The health facility has a functioning, well-equipped resuscitation trolley for paediatric emergency resuscitation and care with readily accessible and identifiable age-appropriate medicines, resuscitation equipment and supplies (e.g. suction device, pulse oximeter, laryngoscope, endotracheal tubes, bag valve masks, infusion sets) available at all times in areas designated for emergency care in…	Inputs: Infrastructure, equipment, supplies cross-cutting	Supplies and equipment cross-cutting (essential medicines)	Supporting systems	Input InfrastMedSupEquip	Both		4	3	5	4	3		16		0				0		0	5	5					0	4	3	3	10	Yes	SELECTED	NOT SELECTED	InR		this is similar to Standard 1.1.
	8.3	8	4	MS-7		4. The health facility has a safe, uninterrupted source of oxygen and equipment for delivery (age-appropriate nasal prongs, catheters and face masks) available at all times in children’s wards and emergency areas. (95.72)	Inputs: Infrastructure, equipment, supplies cross-cutting	Supplies and equipment cross-cutting (essential medicines) inpatient	Supporting systems	Input InfrastMedSupEquip	Inpatient		4	4	3	5	3	4	16		0				0		0	4	4					0	4	3	3	10	No	NOT SELECTED	NOT SELECTED	InR
	8.3	8	5	MS-7		5. The health facility has basic equipment (X-ray, ultrasound and basic laboratory equipment) for diagnosis and management of common childhood illnesses and conditions. (94.30)	Inputs: Infrastructure, equipment, supplies cross-cutting	Supplies and equipment cross-cutting (essential medicines)	Supporting systems	Input InfrastMedSupEquip	Both		4	4	3	5	3	3	16		0				0		0	4	4					0	4	3	3	10	No	NOT SELECTED	NOT SELECTED	InR
	8.3	8	6	MS-7		6. The health facility has culturally and age-appropriate toys, games, books and facilities for play and entertainment of children on wards and in play and recreational areas. 85.25)	Inputs: Infrastructure, equipment client-centered	Supplies and equipment for client-centered practices inpatient	Supporting systems	Input InfrastMedSupEquip	Inpatient		4	4	4	5	3	3	17		0				0		0	4	4					0	4	3	3	10	No	NOT SELECTED	NOT SELECTED	InR
	8.3	8	7	MS-7		7. The health facility has a dedicated budget for essential equipment and its maintenance. (89.19)	Inputs: financing	Financing of cross-cutting supporting systems (energy, fuel for vehicles)	Supporting systems	Input Financing	Both		4	4	3	5	3	3	16		0				0		0	4	4					0	4	3	3	10	No	NOT SELECTED	NOT SELECTED	InR
	8.3	8	8	MS-7		8. The health facility has the minimum requirements for an adequate cold chain, with a functioning refrigerator and a temperature monitoring device, and the temperature has been maintained between 2 and 8 ªC for the past 30 days. (95.09)	Inputs: management and oversight	Oversight and management on cross-cutting supporting systems	Supporting systems	Input Over&Man	Both		4	4	2	4	3	3	14		0				0		0	4	4					0	4	3	3	10	No	NOT SELECTED	NOT SELECTED	InR
	8.3	8	9	MS-7		9. The health facility has an updated inventory of medical equipment, with documentation of breakage or malfunction and dates of repair or replacement. (91.18)	Inputs: management and oversight	Oversight and management on cross-cutting supporting systems	Supporting systems	Input Over&Man	Both		4	4	3	5	3	3	16		0				0		0	5	5					0	4	3	3	10	Yes	SELECTED	NOT SELECTED	InR
	8.3	8	10	MS-7		10. The health facility has functioning age- and size-appropriate beds and furnishings (chairs, tables) on paediatric wards or areas designated for child care. (90.81)	Inputs: Infrastructure, equipment client-centered	Supplies and equipment for client-centered practices	Supporting systems	Input InfrastMedSupEquip	Inpatient		4	4	3	4	3	3	15		0				0		0	4	4					0	4	3	3	10	No	NOT SELECTED	NOT SELECTED	InR
	8.3	8	11	MS-7		1. Proportion of all children admitted to the health facility who received age-appropriate play and entertainment materials during the last 3 days of their stay. (78.23)	Inputs: Infrastructure, equipment client-centered	Supplies and equipment for client-centered practices inpatient	Supporting systems	Process	Inpatient		4	4	3	4	3	3	15		0				0		0	4	4					0	4	3	3	10	No	NOT SELECTED	NOT SELECTED	Client		Similar indicator exist in Standard #6
	8.3	8	12	MS-7		2. Proportion of days per calendar year during which one or more essential item of equipment was not available. (81.28)	Inputs: Infrastructure, equipment, supplies cross-cutting	Availability of essential medicines, equipment, power, water and WASH supplies	Supporting systems	Input InfrastMedSupEquip	Inpatient	1 ASB/ETAT/Asses/class/full	4	4	3	5	3	3	16		0				0		0	4	4					0	4	3	3	10	No	NOT SELECTED	NOT SELECTED	InR
	8.3	8	13	MS-7		1. Proportion of days per calendar year during which an oxygen source and delivery were not available. (87.19)	Inputs: Organization and availability of health services	Availability of essential medicines, equipment, power, water and WASH supplies inpatient	Supporting systems	Input InfrastMedSupEquip	Inpatient		4	4	3	5	3	3	16		0				0		0	5	5					0	4	3	3	10	Yes	SELECTED	NOT SELECTED	InR		similar indicator exist in Standard 8.4
	8.3	8	14	MS-7		2. Proportion of patients who did not receive essential care to the normal standard because one or more items of essential equipment was unavailable. (81.82)	Outomes: Access to medicines, services and facilities, financial access to services	Access to medications and supplies in the health facility	Supporting systems	Input InfrastMedSupEquip	Both		4	4	2	5	3	3	15		0				0		0	4	4					0	4	3	3	10	No	NOT SELECTED	NOT SELECTED	InR
	8.3	8	15	MS-7		3. Proportion of reviewed child deaths in which the child did not receive appropriate care because of lack of essential age-appropriate equipment. (90.28)	Outomes: Access to medicines, services and facilities, financial access to services	Access to supplies, medicines, equipment inpatient	Supporting systems	Input InfrastMedSupEquip	Inpatient		4	4	3	5	3	3	16		0				0		0	4	4					0	4	3	3	10	No	NOT SELECTED	NOT SELECTED	RIS
	8.4	8	1	MS-7		1. The health facility has up-to-date, written protocols and guidance for safe storage of medicines in designated pharmacy cupboards or stores and for safe administration. (93.00)	Inputs: Operational Guidelines	Operational guidelines, protocols related to cross-cutting supporting systems (management, human resources, health information system, infrastructure, supplies and equipment, health financing, organization of health services)	Supporting systems	Input OperGuide	Both		4	4	4	4	3	3	16		0				0		0	4	4					0	3	3	3	9	No	NOT SELECTED	NOT SELECTED	InR
	8.4	8	2	MS-7		2. The health facility has an on-site pharmacy with trained pharmacists or dispensers available during all facility operating hours, who maintain an essential list of child-appropriate medicines and supplies, adequate stocks and an efficient stock management system. (95.08)	Inputs: Organization and availability of health services	Health Care Services (availability)	Supporting systems	Input Ser Avail	Both		4	4	4	4	3	3	16		0				0		0	5	5					0	4	3	3	10	Yes	SELECTED	NOT SELECTED	InR
	8.4	8	3	MS-7		3. The health facility has supplies of emergency and prereferral medicines that are readily accessible for severely ill children. (94.22)	Inputs: Infrastructure, equipment, supplies cross-cutting	Availability of essential medicines, equipment, power, water and WASH supplies	Supporting systems	Input InfrastMedSupEquip	Both		4	4	3	5	3	3	16		0				0		0	5	5					0	4	3	3	10	Yes	SELECTED	NOT SELECTED	InR
	8.4	8	4	MS-7		4. The health facility has supplies of first- and second-line injectable antibiotics, antimalarial agents and other essential medicines available at all times for the management of children. (94.70)	Inputs: Infrastructure, equipment, supplies cross-cutting	Availability of essential medicines, equipment, power, water and WASH supplies	Supporting systems	Input InfrastMedSupEquip	Both		4	4	3	5	3	3	16		0				0		0	4	4					0	3	3	3	9	No	NOT SELECTED	NOT SELECTED	InR
	8.4	8	5	MS-7		5. The health facility has supplies of essential vaccines available at all times for vaccination of children and young adolescents. (94.52)	Inputs: Infrastructure, equipment, supplies cross-cutting	Availability of essential medicines, equipment, power, water and WASH supplies	Supporting systems	Input InfrastMedSupEquip	Both		3	4	4	3	3	3	14		0				0		0	4	4					0	3	3	3	9	No	NOT SELECTED	NOT SELECTED	InR		This is reflected in standard 1.9
	8.4	8	6	MS-7		6. The health facility has supplies of thermometers, age-appropriate weighing scales and wooden boards or metal beams with a mounted rule that permit measurement of crown-to-heel length (infants < 2 years lying down) or height (older children standing up) in centimetres. (95.36)	Inputs: Infrastructure, equipment, supplies cross-cutting	Availability of essential medicines, equipment, power, water and WASH supplies	Supporting systems	Input InfrastMedSupEquip	Both		3	4	3	3	3	3	13		0				0		0	4	4					0	3	3	3	9	No	NOT SELECTED	NOT SELECTED	InR		This belongs to Standard 8.3.
	8.4	8	7	MS-7		7. The health facility has adequate essential child-friendly equipment and medical supplies, including an oxygen source, to support routine and emergency management of children. (94.04)	Inputs: Infrastructure, equipment, supplies cross-cutting	Availability of essential medicines, equipment, power, water and WASH supplies	Supporting systems	Input InfrastMedSupEquip	Both		3	4	3	3	3	3	13		0				0		0	4	4					0	3	3	3	9	No	NOT SELECTED	NOT SELECTED	InR
	8.4	8	8	MS-7		8. The health facility has essential laboratory supplies (e.g. needles, reagents, specimen bottles) to support routine and emergency management of children. (94.88)	Inputs: Infrastructure, equipment, supplies cross-cutting	Availability of essential medicines, equipment, power, water and WASH supplies	Supporting systems	Input InfrastMedSupEquip	Both		4	4	3	5	3	3	16		0				0		0	5	5					0	4	3	3	10	Yes	SELECTED	NOT SELECTED	InR		need consistency. Supplies is noted in standard 8.3. We need to agree whether we want laboratory in Standar 8.3 or 8.4.
	8.4	8	9	MS-7		9. The facility has a system for the storage and distribution of all vaccines and their diluents in a cold-chain system maintained in the WHO-recommended temperature ranges at all times. (95.87)	Inputs: management and oversight	Oversight and management on cross-cutting supporting systems	Supporting systems	Input Over&Man	Both		4	4	3	5	3	3	16		0				0		0	4	4					0	3	3	3	9	No	NOT SELECTED	NOT SELECTED	InR
	8.4	8	10	MS-7		1. Proportion of health professionals who provide child health services who have received training in appropriate child medication. (88.67)	Inputs: Human resources	Human resources (specific clinincal training)	Supporting systems	Input HumRes	Both		4	4	3	5	3	3	16		0				0		0	4	4					0	3	3	3	9	No	NOT SELECTED	NOT SELECTED	Prov
	8.4	8	11	MS-7		1. Proportion of days in the past 3 months when there were stock outs of one or more essential medicines. (90.74)	Inputs: Infrastructure, equipment, supplies cross-cutting	Availability of essential medicines, equipment, power, water and WASH supplies	Supporting systems	Input InfrastMedSupEquip	Both		4	4	3	5	3	3	16		0				0		0	5	5					0	4	3	3	10	Yes	SELECTED	NOT SELECTED	InR
	8.4	8	12	MS-7		2. Proportion of days in the past 3 months when there was a stock out of blood. (90.98)	Inputs: Organization and availability of health services	Availability of essential medicines, equipment, power, water and WASH supplies inpatient	Supporting systems	Input InfrastMedSupEquip	Inpatient		4	4	3	5	4	4	16		0				0		0	5	5					0	4	3	3	10	Yes	SELECTED	NOT SELECTED	InR
	8.4	8	13	MS-7		3. Proportion of days in the past 3 months when oxygen was not available in the health facility in areas in which children are cared for. (91.40)	Inputs: Organization and availability of health services	Availability of essential medicines, equipment, power, water and WASH supplies inpatient	Supporting systems	Input InfrastMedSupEquip	Inpatient		4	4	3	5	4	4	16		0				0		0	4	4					0	3	3	3	9	No	NOT SELECTED	NOT SELECTED	InR
	8.4	8	14	MS-7		4. Proportion of reviewed child deaths in which the child did not receive appropriate care due to lack of essential medicines or supplies. (91.23)	Outomes: Access to medicines, services and facilities, financial access to services	Access to supplies, medicines, equipment inpatient	Supporting systems	Input InfrastMedSupEquip	Inpatient		4	4	3	5	3	3	16		0				0		0	4	4					0	3	3	3	9	No	NOT SELECTED	NOT SELECTED	Doc
			15	MS-7		The health facility has all clinical guidelines nesessary for care of newborns, children and young adolescents relevant to the level of care (inpatient and/or outpaitnet)	Inputs: Clinical Guidelines, protocols, job aides	All clinical guidelines	Supporting systems	Input ClinGuidelin	Both		4	4	3	5	3	3	16		0				0		0	5	5					0	4	3	3	10	Yes	SELECTED	NOT SELECTED	InR		as discussed, we need to have one measure that collectively describes all relevant paediatric clinical guidelines to be available in health facilities. Therefore, adding this measure was proposed.
			16	MS-7		The health facility has all operational guidelines to provide care of newborns, children and young adolescents relevant to the level of care	Inputs: Operational Guidelines	All operational guidelines	Supporting systems	Input OperGuide	Both		4	4	3	5	3	3	16		0				0		0	5	5					0	4	3	3	10	Yes	SELECTED	NOT SELECTED	InR		as discussed, we need to have one measure that collectively describes all relevant paediatric non-clinical guidelines to be available in health facilities. Therefore, adding this measure was proposed.

## Sheet: Demonstration_Backup
															Mininumm Score for all criteria	16					scores 1-5 (1 lowest, 5 highest)
															Mininumm Score for D1 Inputs	4																												TRUE
															Mininumm Score for D1 Processes	13																												FALSE
															Mininumm Score for Dom 1 outcomes	4
															Mininumm Score for Dom 2	5
															Mininumm Score for Dom 3	2.5
															Minimum Score Common Core	13
												Criteria for all measures							Criteria for Domain 1								Criterion for Domain 2		Criteria for Domain 3					Additional Criteria Common Core				Prioretization results			Additional features		Comment
Stat	St	N	Subdomain		Measures	Measurement Domain	Measurement Scope	Measurement Domain	System categories	Service Settings	Clinical Areas	Relevant	Actionable	Feasible	Valid	Accurate/Reliable	Clear	TotalScore	Importance (inputs)	TotalScore Inputs	Importance	Coverage	EB/Impactful	TotalScore Processes	Importance (Outcomes)	TotalScore Outcomes	Importance	TotalScore Dom2	Participation	Patient Reported	No Harm	Patient's Right	TotalScore Dom3	Useful	Impactful	Comparable	TotalScore Common Core	Prioretized based on additional criteria	Selected for catalogue Measures	Selected for Common Core	Preferred Data Source	Measurement Frequency	Comment
1.1	1	1	MS-1		1. The health facility has written, up-to-date clinical protocols and procedures for emergency triage, assessment and management of common paediatric emergencies and trauma consistent with evidence-based and/or WHO guidelines. (92.71)		Clinical condition-specific guidelines, protocols, job aides	Provision Of Care	Input ClinGuidelin	Both	1 ASB/ETAT/Asses/class/full	4	4	3	4	2	2	15	4	1.2				0		0		0					0	3	2	2	7	No	NOT SELECTED	NOT SELECTED	InR
1.1	1	2	MS-1		2. The health facility has the essential equipment and supplies for assessing and monitoring paediatric emergencies (e.g. weighing scales, thermometer, blood pressure measuring device, blood glucose and oxygen saturation tests). (95.59)	Inputs: Clinical Guidelines, protocols, job aides	Clinical condition-specific medicines, supplies and equipment	Provision	Input InfrastMedSupEquip	Both	1 ASB/ETAT/Asses/class/full	4	4	5	5	2	3	18	5	5				0		0		0					0	3	3	4	10	Yes	SELECTED	NOT SELECTED	InR
1.1	1	3	MS-1		3. The health facility has a 24-h triage system for every sick child to ensure a rapid visual inspection within a few minutes of arrival that is not delayed by administrative or payment procedures. (88.72)	Inputs: Operational Guidelines	Operational guidelines, protocols related to care provision	Provision	Input Over&Man	Both	1 ASB/ETAT/Asses/class/full	4	5	5	4	3	4	18	5	2.5				0		0		0					0	3	3	2	8	No	NOT SELECTED	NOT SELECTED	InR	semiannual
1.1	1	4	MS-1		4. The health facility receiving a referred paediatric patient with danger or emergency signs or injuries has a system for immediate emergency care, and a full initial assessment is made by suitably trained staff within 15 min of arrival. (88.30)	Inputs: Operational Guidelines	Operational guidelines, protocols related to care provision inpatient	Provision	Input Over&Man	Inpatient	1 ASB/ETAT/Asses/class/full	5	5	3	4	3	3	17	5	2.5				0		0		0					0	3	3	4	10	No	NOT SELECTED	NOT SELECTED	InR
1.1	1	5	MS-1		5. The health facility has a designated emergency care area, room or trolley in the outpatient area and wards equipped with appropriate paediatric equipment, supplies and essential medicines for emergency resuscitation and initial treatment. (94.19)	Inputs: infrastructure, equipment, supplies clinical condition-specific	Clinical condition-specific medicines, supplies and equipment	Provision	Input InfrastMedSupEquip	Both	1 ASB/ETAT/Asses/class/full	4	4	4	4	3	4	16	5	5				0		0		0					0	3	3	4	10	Yes	SELECTED	NOT SELECTED	InR
1.1	1	6	MS-1		6. The designated emergency care area, room or trolley in the outpatient area and wards has visible emergency care aids (e.g. standardized algorithms or protocols, medicines, fluids and treatment dosage wall charts). (90.49)	Inputs: infrastructure, equipment, supplies clinical condition-specific	Clinical condition-specific medicines, supplies and equipment	Provision	Input ClinGuidelin	Both	1 ASB/ETAT/Asses/class/full	4	4	4	3	3	4	15	4	1.2				0		0		0					0	3	3	2	8	No	NOT SELECTED	NOT SELECTED	InR
1.1	1	7	MS-1		7. The health facility professional staff organize emergency care drills at least once every 12 months for all staff working in paediatric emergency areas and on wards to which severely ill children are admitted. (85.39)	Inputs: Human resources	Human resources (specific clinincal training)	Provision	Input HumRes	Both	1 ASB/ETAT/Asses/class/full	4	4	4	4	3	4	16	5	3.5				0		0		0					0	3	3	3	9	No	NOT SELECTED	NOT SELECTED	Prov		1.1. #7 is similar to #12
1.1	1	8	MS-1		8. The health facility maintains an update-to-date 24-h staff duty roster, with a functioning contact mechanism for finding additional support, which ensures that staff responsible for paediatric triage are available at all times. (88.95)	Inputs: management and oversight	Oversight and management on care provision	Provision	Input Over&Man	Inpatient	1 ASB/ETAT/Asses/class/full	4	5	3	4	3	3	16	4	2				0		0		0					0	3	3	3	9	No	NOT SELECTED	NOT SELECTED	InR
1.1	1	12	MS-1		4. Proportion of all professional health staff who care for children in a health facility who received training or refresher courses in emergency triage, assessment and treatment or paediatric emergency care during the past 12 months. (89.59)	Inputs: Human resources	Human resources (specific clinincal training)	Provision	Input HumRes	Both	1 ASB/ETAT/Asses/class/full	4	4	4	4	3	4	16	4	2.8				0		0		0					0	3	3	3	9	No	NOT SELECTED	NOT SELECTED	Prov		1.1. #7 is similar to #12
1.1	1	13	MS-1		5. Proportion of all professional health staff who care for children in a health facility who received training and/or refresher sessions in the management of common paediatric conditions during the past 12 months. (86.73)	Inputs: Human resources	Human resources (specific clinincal training)	Provision	Input HumRes	Both	1 ASB/ETAT/Asses/class/full	4	4	4	4	3	4	16	4	2.8				0		0		0					0	3	3	3	9	No	NOT SELECTED	NOT SELECTED	Prov
1.1	1	9	MS-2		1. Proportion of all children with general danger or emergency signs or injuries who were assessed within 15 min of arrival at the facility (86.78)	Processes: EB care, harmful practices, patient-centered practices	Compliance with EB care practices	Provision	Process	Both	1 ASB/ETAT/Asses/class/full	4	4	3	4	3	3	15		0	5	3	3	11		0		0					0	4	4	3	11	No	NOT SELECTED	NOT SELECTED	RIS		Difficult to cocalculate the denominator. I would suggest to measure index of integrated assessment by WHO indicator or assessment of vital and danger signs.
1.1	1	10	MS-2		2. Proportion of all children with general danger or emergency signs who required referral who received correct emergency and/or prereferral treatment. (88.42)	Processes: EB care, harmful practices, patient-centered practices	Compliance with EB care practices	Provision	Process	Both	1 ASB/ETAT/Asses/class/full	4	4	4	4	4	3	16		0	5	3	5	13		0		0					0	4	4	3	11	Yes	SELECTED	NOT SELECTED	RIS		Note: in the column X, cells highlighted in yellow are the ones with no evidence. The scoring for these measures are done by expert
1.1	1	11	MS-2		3. Proportion of all children under 5 years of age who did not require urgent referral or admission who were properly assessed according to WHO Integrated management of childhood and neonatal illnesses (IMNCI) guidelines. (84.66)	Processes: EB care, harmful practices, patient-centered practices	Compliance with EB care practices	Provision	Process	Both	1 ASB/ETAT/Asses/class/full	4	4	3	5	4	3	16		0	5	5	5	15		0		0					0	4	5	4	13	Yes	SELECTED	CORE	RIS	Monthly	This is similar to WHO's Index of Integrated Assessment indicator, which includes 10 assessment elements.
1.1	1	14	MS-2		6. Proportion of all sick children who attended the health facility who were immediately triaged on arrival, before receiving definitive care or a full assessment by a health professional. (82.97)	Inputs: Organization and availability of health services	Organization of care processes (including information exchange, care coordination and referral)	Provision	Process	Both	1 ASB/ETAT/Asses/class/full	4	4	3	4	4	3	15		0	5	5	3	13		0		0					0	4	4	3	11	Yes	NOT SELECTED	NOT SELECTED	RIS
1.1	1	15	MS-2		7. Proportion of all children in shock who were adequately assessed for signs of shock and were appropriately resuscitated according to WHO guidelines. (87.51)	Processes: EB care, harmful practices, patient-centered practices	Compliance with EB care practices	Provision	Process	Inpatient	1 ASB/ETAT/Asses/class/full	4	4	3	4	4	3	15		0	5	2	5	12		0		0					0	4	4	3	11	No	NOT SELECTED	NOT SELECTED	RIS
1.1	1	16	MS-3		1. Proportion of all cases of children who died within 24 h of admission whose cases were audited and reviewed as part of performance improvement. (91.49)		Death notification, review	Provision	Input QI	Both	18 Undefined	3	4	3	3	4	5	13		0				0		0		0					0				0	No	NOT SELECTED	NOT SELECTED	InR		1.1. #16 is similar to 2.2. #7 indicator, it is more natural to leave it in standard 2.2
1.1	1	17	MS-3		2. Proportion of sick children who attended the health facility who were triaged before seeing a doctor for treatment in either the outpatient department or the emergency unit. (77.57)		Organization of care processes (including information exchange, care coordination and referral)	Provision	Process	Both	1 ASB/ETAT/Asses/class/full							0		0				0		0		0					0				0	No	NOT SELECTED	NOT SELECTED	RIS
1.1	1	18	MS-3		3. The age-disaggregated child mortality rate in the health facility: number of child deaths in the total number of children who presented to the health facility). (93.10)	Impact/No disease-specific care outcomes	Impact inpatient (no clinical content-specific outcomes e.g institutional child mortality)	Provision	Impact	Both	18 Undefined	5	5	4	5	4	3	19		0				0	5	5		0					0	5	4	5	14	Yes	SELECTED	CORE	RIS	Monthly	disaggregate by age and cause
1.1	1	19	MS-3		4. Proportion of all children with emergency signs who were resuscitated and received emergency care consistent with WHO emergency care protocols and guidelines. (84.96)	Processes: EB care, harmful practices, patient-centered practices	Compliance with EB care practices	Provision	Process	Both	1 ASB/ETAT/Asses/class/full							0		0	5	3	5	13		0		0					0				0	Yes	NOT SELECTED	NOT SELECTED	RIS
1.2	1	1	MS-1		1. The health facility has written, up-to-date clinical protocols for assessing, identifying and appropriately managing newborns and young infants with PSBI, local infections or jaundice, consistent with WHO guidelines. (93.16)	Inputs: Clinical Guidelines, protocols, job aides	Clinical condition-specific guidelines, protocols, job aides	Provision	Input ClinGuidelin	Both	2 SickYI/Pret/Small	4	4	3	4			15	4	1.2				0		0		0					0	3	3	2	8	No	NOT SELECTED	NOT SELECTED	InR
1.2	1	2	MS-1		2. The health facility has supplies of antibiotics (first- and second-line) for prereferral treatment and/or full treatment of neonatal sepsis and meningitis that are adequate for the expected case load without stock outs. (95.48)	Inputs: infrastructure, equipment, supplies clinical condition-specific	Clinical condition-specific medicines, supplies and equipment	Provision	Input InfrastMedSupEquip	Both	2 SickYI/Pret/Small	4	4	4	4	3	4	16	5	5				0		0		0					0	3	3	4	10	Yes	SELECTED	NOT SELECTED	InR
1.2	1	3	MS-1		3. The health facility clinical staff who care for newborn and young infants receive training or regular refresher sessions in recognizing and managing sick young infants at least once every 12 months. (89.30)	Inputs: Human resources	Human resources (specific clinincal training)	Provision	Input HumRes	Both	2 SickYI/Pret/Small	4	4	4	4	3	4	16		0				0		0		0					0	3	3	3	9	No	NOT SELECTED	NOT SELECTED	Prov
1.2	1	4	MS-1		4. The referral receiving facility for high-risk and severely ill newborn and young infants has appropriate diagnostic tests and medical devices for appropriate investigation and management. (93.40)	Inputs: infrastructure, equipment, supplies clinical condition-specific	Clinical condition-specific medicines, supplies and equipment inpatient	Provision	Input InfrastMedSupEquip	Inpatient	2 SickYI/Pret/Small	4	4	4	4	3	4	16	3	3				0		0		0					0	3	3	4	10	No	NOT SELECTED	NOT SELECTED	InRInI
1.2	1	5	MS-1		5. The referral receiving facility has adequate material to provide optimal thermal care to preterm and small infants, including facilities for Kangaroo mother care. (93.37)	Inputs: infrastructure, equipment, supplies clinical condition-specific	Clinical condition-specific medicines, supplies and equipment outpatient	Provision	Input InfrastMedSupEquip	Inpatient	2 SickYI/Pret/Small	4	4	4	4	3	4	16	5	5				0		0		0					0	3	3	4	10	Yes	SELECTED	NOT SELECTED	InRInI
1.2	1	6	MS-1		6. The referral receiving facility for newborns with severe jaundice has procedures in place to assess severity, check bilirubin and provide effective phototherapy. (94.83)		Health Care Services (availability) inpatient	Provision	Input OperGuide	Inpatient	2 SickYI/Pret/Small	4	4	4	4	4	3	16	4	1.2				0		0		0					0	3	3	3	9	No	NOT SELECTED	NOT SELECTED	InR
1.2	1	7	MS-1		7. The referral facility has a separate area or room in which sick newborns and young infants are admitted and managed. (91.70)	Inputs: infrastructure, equipment, supplies clinical condition-specific	Clinical condition-specific infrastructure inpatient	Provision	Input InfrastMedSupEquip	Inpatient	2 SickYI/Pret/Small	4	4	4	4	3	4	16	3	3				0		0		0					0	3	3	4	10	No	NOT SELECTED	NOT SELECTED	InR
1.2	1	8	MS-1		8. The referral receiving health facility has facilities for Kangaroo mother care and practises rooming-in of parents with their sick infants. (88.83)	Inputs: infrastructure, equipment, supplies clinical condition-specific	Clinical condition-specific infrastructure inpatient	Provision	Input InfrastMedSupEquip	Inpatient	2 SickYI/Pret/Small	4	4	4	4	3	4	16	3	3				0		0		0					0	3	3	4	10	No	NOT SELECTED	NOT SELECTED	InR
1.2	1	9	MS-2		1. Proportion of all sick young infants admitted to the health facility with any signs of PSBI who were appropriately classified and managed for PSBI or sepsis. (87.94)	Processes: EB care, harmful practices, patient-centered practices	Compliance with EB care practices inpatient	Provision	Process	Inpatient	2 SickYI/Pret/Small	4	3	3	4	4	3	14		0	5	3	3	11		0		0					0	4	4	3	11	No	NOT SELECTED	NOT SELECTED	Obs		#9 and #10 are similar. Picking #10 measure since it assesses performance at both levels: do not we need to check this indicator at thre
1.2	1	10	MS-2		2. Proportion of all sick young infants classified as having PSBI or sepsis who were prescribed appropriate antibiotics (correct choice, dose, frequency, route of administration and duration) according to WHO guidelines. (90.86)	Processes: EB care, harmful practices, patient-centered practices	Compliance with EB care practices	Provision	Process	Both	2 SickYI/Pret/Small	4	4	3	5	4	3	16		0	5	4	4	13		0		0					0	4	5	4	13	Yes	SELECTED	CORE	RIS	Monthly
1.2	1	11	MS-2		3. Proportion of all sick young infants admitted to the facility with PSBI or fast breathing who were appropriately assessed for oxygen requirements with a pulse oximeter and received the documented appropriate amount of oxygen. (85.75)	Processes: EB care, harmful practices, patient-centered practices	Compliance with EB care practices inpatient	Provision	Process	Inpatient	2 SickYI/Pret/Small	4	4	3	5	4	3	16		0	5	4	3	12		0		0					0	4	5	3	12	No	NOT SELECTED	NOT SELECTED	RIS
1.2	1	13	MS-2		5. Proportion of all sick young infants with severe jaundice whose bilirubin level was checked and who were appropriately managed according to WHO guidelines. (90.70)	Processes: EB care, harmful practices, patient-centered practices	Compliance with EB care practices	Provision	Process	Inpatient	2 SickYI/Pret/Small	4	4	3	4	3	4	15		0	5	1	2	8		0		0					0	4	4	4	12	No	NOT SELECTED	NOT SELECTED	RIS
1.2	1	14	MS-2		6. Proportion of pre-term and/or small infants weighing < 2000 g who received Kangaroo mother care as part of clinical management in the health facility. (87.11)	Processes: EB care, harmful practices, patient-centered practices	Compliance with EB care practices	Provision	Process	Both	2 SickYI/Pret/Small	4	5	3	4	4	3	16		0	5	4	4	13		0		0					0	4	5	4	13	Yes	SELECTED	CORE	RIS	Monthly
1.2	1	15	MS-3		7. Proportion of all sick young infants admitted to the facility who were maintained on exclusive breastfeeding and/or received only expressed breast milk during hospitalization, up to discharge. (84.05)	Impact/No disease-specific care outcomes	Children under 6 months exclusively breastfed inpatient	Provision	Outcome	Inpatient	2 SickYI/Pret/Small	3	4	4	4	3	4	15		0	5	4	4	13	5	5		0					0	4	4	4	12	Yes	NOT SELECTED	NOT SELECTED	RIS		Indicator # 10 of 5.5.; #6 of of 6.1., #7 of 1.6. and #15 of 1.2. are the same; we have selected this in Standard 5.5.
1.2	1	16	MS-3		1. Proportion of all sick young infants treated for PSBI or sepsis who died in the health facility (case fatality rate). (94.20)	Outcomes: clinical condition-specific outcome	Clinical condition-specific outcome inpatient	Provision	Outcome	Inpatient	2 SickYI/Pret/Small	4	4	4	4	3	4	16		0				0	5	5		0					0	4	4	4	12	Yes	SELECTED	NOT SELECTED	RIS
1.2	1	17	MS-3		2. Proportion of all sick young infants who were readmitted within 48 h of discharge. (85.16)	Outcomes: clinical condition-specific outcome	Clinical condition-specific outcome inpatient	Provision	Outcome	Inpatient	2 SickYI/Pret/Small	4	4	4	4	3	4	16		0				0	3	3		0					0	4	4	4	12	No	NOT SELECTED	NOT SELECTED	RIS
1.2	1	18	MS-3		3. Proportion of all newborns (0–28 days) managed in the health facility who died in the health facility. (96.96)	Outcomes: clinical condition-specific outcome	Clinical condition-specific outcome inpatient	Provision	Impact	Inpatient	18 Undefined							0		0				0	5	5		0					0	4	4	4	12	Yes	NOT SELECTED	NOT SELECTED	RIS
1.2	1	19	MS-3		4. The death rate of low-birth-weight infants in the health facility disaggregated by birth weight: 2000–2499 g, 1500–1999 g, < 1500 g. (90.80)	Outcomes: clinical condition-specific outcome	Clinical condition-specific outcome	Provision	Outcome	Outpatient	2 SickYI/Pret/Small	4	4	4	4	4	4	16		0				0	5	5		0					0	4	4	4	12	Yes	SELECTED	NOT SELECTED	RIS
1.3	1	1	MS-1		1. The health facility has a written, up-to-date, evidence-based clinical protocol for identifying and managing children with cough or difficult breathing, consistent with IMCI and paediatric care guidelines. (93.52)	Inputs: Clinical Guidelines, protocols, job aides	Clinical condition-specific guidelines, protocols, job aides	Provision	Input ClinGuidelin	Both	3 ASB/Cough/Breath	4	4	3	4			15	4	1.2				0		0		0					0	3	3	2	8	No	NOT SELECTED	NOT SELECTED	InR
1.3	1	2	MS-1		2. The referral receiving health facility has basic laboratory and diagnostic tests (e.g. pulse oximetry, full blood count, culture, ultrasound and chest X-ray) available for appropriate investigation of children with severe pneumonia. (93.03)	Inputs: infrastructure, equipment, supplies clinical condition-specific	Clinical condition-specific medicines, supplies and equipment inpatient	Provision	Input InfrastMedSupEquip	Inpatient	3 ASB/Cough/Breath	4	4	4	4	3	4	16	3	3				0		0		0					0				0	No	NOT SELECTED	NOT SELECTED	InR
1.3	1	3	MS-1		3. The health facility has adequate supplies of antibiotics (first- and second-line) for treatment of severe pneumonia and pneumonia for the expected case load with no stock outs. (94.94)	Inputs: infrastructure, equipment, supplies clinical condition-specific	Clinical condition-specific medicines, supplies and equipment	Provision	Input InfrastMedSupEquip	Both	3 ASB/Cough/Breath	4	4	4	4	3	4	16	5	5				0		0		0					0				0	Yes	SELECTED	NOT SELECTED	InR
1.3	1	4	MS-1		4. The health facility has adequate supplies of inhalation bronchodilators and delivery devices for treatment of wheeze for the expected case load with no stock outs. (96.19)	Inputs: infrastructure, equipment, supplies clinical condition-specific	Clinical condition-specific medicines, supplies and equipment	Provision	Input InfrastMedSupEquip	Both	3 ASB/Cough/Breath	4	4	4	4	3	4	16	3	3				0		0		0					0				0	No	NOT SELECTED	NOT SELECTED	InR
1.3	1	5	MS-1		5. The health facility has an adequate supply of pulse oximeters and a reliable, functioning oxygen supply at all times for the expected case load with no stock outs. (92.27)	Inputs: infrastructure, equipment, supplies clinical condition-specific	Clinical condition-specific medicines, supplies and equipment inpatient	Provision	Input InfrastMedSupEquip	Both	3 ASB/Cough/Breath	4	4	4	4	3	4	16	5	5				0		0		0					0				0	Yes	SELECTED	NOT SELECTED	InR
1.3	1	6	MS-1		6. The health facility clinical staff who care for children receive training and regular refresher sessions in assessing and managing children with cough or wheeze at least once every 12 months. (89.49)	Inputs: Human resources	Human resources (specific clinincal training)	Provision	Input HumRes	Both	3 ASB/Cough/Breath	4	4	4	4	3	4	16		0				0		0		0					0	3	3	3	9	No	NOT SELECTED	NOT SELECTED	Prov
1.3	1	7	MS-2		1. Proportion of all children with cough or difficult breathing who are correctly assessed, investigated, classified and diagnosed according to the severity of pneumonia. 88.87)	Processes: EB care, harmful practices, patient-centered practices	Compliance with EB care practices	Provision	Process	Both	3 ASB/Cough/Breath	4	5	3	4	3	3	16		0	5	4	4	13		0		0					0	4	4	3	11	Yes	SELECTED	NOT SELECTED	RIS	Monthly	#7 and #8 are similar indicators. I suggest to chose one. Since #7 covers both levels, suggest to use #7 but avoid using term "according to severity of pneumonia" and instead use term "severity of disease"
1.3	1	8	MS-2		2. Proportion of children < 5 years with cough or difficult breathing treated as outpatients who were correctly classified according to IMCI guidelines. (87.08)	Processes: EB care, harmful practices, patient-centered practices	Compliance with EB care practices outpatient	Provision	Process	Outpatient	3 ASB/Cough/Breath	4	4	3	4	3	3	15		0	5	4	4	13		0		0					0	4	4	4	12	Yes	NOT SELECTED	NOT SELECTED	RIS	Monthly
1.3	1	9	MS-2		3. Proportion of all children with pneumonia or severe pneumonia who received correct antibiotic treatment (formulation, dose, frequency and duration) according to WHO guidelines. (92.74)	Processes: EB care, harmful practices, patient-centered practices	Compliance with EB care practices	Provision	Process	Both	3 ASB/Cough/Breath	4	5	5	4	3	3	18		0	5	4	4	13		0		0					0	5	5	5	15	Yes	SELECTED	CORE	RIS	Monthly
1.3	1	10	MS-2		4. Proportion of all children with asthma who were appropriately administered inhalation bronchodilator treatment. (89.87)	Processes: EB care, harmful practices, patient-centered practices	Compliance with EB care practices	Provision	Process	Both	3 ASB/Cough/Breath	4	5	4	4	3	3	17		0	5	4	4	13		0		0					0	4	4	3	11	Yes	SELECTED	NOT SELECTED	RIS	Monthly	3 or 4: suggest to move this indicator under 1.10 (chronic conditions)
1.3	1	11	MS-2		5. Proportion of all children with pneumonia to whom oxygen was appropriately administered for the clinical indication (signs of hypoxaemia or oxygen saturation < 90%). (86.98)	Processes: EB care, harmful practices, patient-centered practices	Compliance with EB care practices inpatient	Provision	Process	Inpatient	3 ASB/Cough/Breath	4	4	4	4	3	3	16		0	5	4	4	13		0		0					0	4	4	3	11	Yes	SELECTED	NOT SELECTED	RIS	Monthly
1.3	1	12	MS-2		6. Proportion of all children admitted with severe pneumonia whose respiratory rate and oxygen saturation were appropriately monitored. (87.00)	Processes: EB care, harmful practices, patient-centered practices	Compliance with EB care practices inpatient	Provision	Process	Inpatient	3 ASB/Cough/Breath	4	4	3	4	3	3	15		0	5	3	3	11		0		0					0	4	4	3	11	No	NOT SELECTED	NOT SELECTED	RIS	Monthly
1.3	1	13	MS-2		7. Proportion of all children with cough for ≥ 14 days who were referred or further assessed and investigated for TB or other causes of chronic infection. (87.28)	Processes: EB care, harmful practices, patient-centered practices	Compliance with EB care practices	Provision	Process	Both	3 ASB/Cough/Breath	4	5	3	4	3	3	16		0	5	3	5	13		0		0					0	4	3	3	10	Yes	SELECTED	NOT SELECTED	RIS	Monthly
1.3	1	14	MS-2		8. Proportion of all children with only cough and cold (with no signs of pneumonia or severe pneumonia) who received antibiotics. (79.37)	Processes: EB care, harmful practices, patient-centered practices	Non-evidence-based, harmful practices	Provision	Process	Both	3 ASB/Cough/Breath	4	5	4	4	3	3	17		0	5	5	4	14		0		0					0	5	4	4	13	Yes	SELECTED	CORE	RIS	Monthly
1.3	1	15	MS-3		1. Proportion of all children managed for pneumonia in the health facility who died of pneumonia (case fatality rate). (94.14)	Outcomes: clinical condition-specific outcome	Clinical condition-specific outcome inpatient	Provision	Outcome	Inpatient	3 ASB/Cough/Breath	4	4	4	5	3	3	17		0	5			5	5	5		0					0	4	4	4	12	Yes	SELECTED	NOT SELECTED	RIS
1.3	1	16	MS-3		2. Proportion all children who died of pneumonia among all children admitted to the health facility. (85.30)	Outcomes: clinical condition-specific outcome	Clinical condition-specific outcome inpatient	Provision	Outcome	Inpatient	3 ASB/Cough/Breath	4	4	4	3	3	3	15		0	4			4	5	5		0					0	4	4	4	12	Yes	NOT SELECTED	NOT SELECTED	RIS
1.3	1	17	MS-3		3. Proportion of all children managed for pneumonia in the health facility who died of pneumonia within the initial 24 h of admission. (86.59)	Outcomes: clinical condition-specific outcome	Clinical condition-specific outcome inpatient	Provision	Outcome	Inpatient	3 ASB/Cough/Breath	4	4	3	4	3	3	15		0	4			4	4	4		0					0	4	4	4	12	Yes	NOT SELECTED	NOT SELECTED	RIS
1.3	1	18	MS-3		4. Proportion of all children managed for wheeze or asthma in the health facility who died of wheeze. (82.68)	Outcomes: clinical condition-specific outcome	Clinical condition-specific outcome inpatient	Provision	Outcome	Inpatient	3 ASB/Cough/Breath	4	4	4	5	3	3	17		0	3			3	5	5		0					0	4	4	4	12	Yes	SELECTED	NOT SELECTED	RIS
1.4	1	1	MS-1		1. The health facility has a written, up-to-date clinical protocol for identifying and managing children with diarrhoea, consistent with WHO guidelines. (95.23)	Inputs: Clinical Guidelines, protocols, job aides	Clinical condition-specific guidelines, protocols, job aides	Provision	Input ClinGuidelin	Both	4 ASB/Diarrhoea	4	4	3	4			15	4	1.2				0		0		0					0	3	3	2	8	No	NOT SELECTED	NOT SELECTED	InR		Indicator #1 and #2 are very similar
1.4	1	2	MS-1		2. The health facility staff use standard guidelines to assess, document and appropriately manage children with diarrhoea and dehydration or dysentery, based on WHO guidelines. (91.08)	Inputs: Clinical Guidelines, protocols, job aides	Clinical condition-specific guidelines, protocols, job aides	Provision	Input ClinGuidelin	Both	4 ASB/Diarrhoea	4	4	3	4			15	4	1.2				0		0		0					0	3	3	2	8	No	NOT SELECTED	NOT SELECTED	InR		Indicator #1 and #2 are very similar
1.4	1	3	MS-1		3. The health facility paediatric outpatient areas and inpatient wards have rehydration algorithms and plan A, B and C charts available and visibly displayed on the walls for use by health care workers and carers. (92.47)	Inputs: Clinical Guidelines, protocols, job aides	Clinical condition-specific guidelines, protocols, job aides	Provision	Input ClinGuidelin	Both	4 ASB/Diarrhoea	4	4	3	4			15	4	1.2				0		0		0					0	3	3	2	8	No	NOT SELECTED	NOT SELECTED	InR
1.4	1	4	MS-1		4. The health facility has adequate supplies for diarrhoea management (IV fluids, oral rehydration salts [ORS], zinc, antibiotics) for the expected case load without stock outs in the past 3 months. (94.72)	Inputs: infrastructure, equipment, supplies clinical condition-specific	Clinical condition-specific medicines, supplies and equipment	Provision	Input InfrastMedSupEquip	both	4 ASB/Diarrhoea	4	3	4	4	4	3	15	5	5				0		0		0					0	3	3	4	10	Yes	NOT SELECTED	NOT SELECTED	InR
1.4	1	5	MS-1		5. The health facility has an appropriate designated space with safe, clean water and adequate supplies for preparing ORS for children with diarroea and dehydration. (92.43)	Inputs: infrastructure, equipment, supplies clinical condition-specific	Clinical condition-specific medicines, supplies and equipment	Provision	Input InfrastMedSupEquip	Both	4 ASB/Diarrhoea	4	4	4	4	3	4	16	5	5				0		0		0					0	3	3	4	10	Yes	SELECTED	NOT SELECTED	InR
1.4	1	16	MS-1		10. Number of days on which the health facilities did not have medicines or supplies to treat diarrhoea (ORS, zinc, IV fluids and supplies, antibiotics) in the past 3 months. (86.38)	Inputs: infrastructure, equipment, supplies clinical condition-specific	Clinical condition-specific medicines, supplies and equipment	Provision	Input InfrastMedSupEquip	Both	4 ASB/Diarrhoea	4	4	4	4	3	4	16	5	5				0		0		0					0	3	3	4	10	Yes	SELECTED	NOT SELECTED	InR
1.4	1	6	MS-1		6. The health facility clinical staff who care for children receive IMCI training and regular refresher sessions in assessing and managing children with diarrhoea who are dehydrated or have dysentery at least once every 12 months. (90.85)	Inputs: Human resources	Human resources (specific clinincal training)	Provision	Input HumRes	Both	17 IMNCI	4	4	4	4	3	4	16		0				0		0		0					0	3	3	3	9	No	NOT SELECTED	NOT SELECTED	Prov
1.4	1	7	MS-2		1. Proportion of all children with appropriately classified diarrhoea who were documented as having received an appropriate rehydration treatment plan (A, B or C) according to WHO guidelines. (89.46)	Processes: EB care, harmful practices, patient-centered practices	Compliance with EB care practices	Provision	Process	Both	4 ASB/Diarrhoea	4	5	3	4	3	3	16		0	4	4	5	13		0		0					0	4	4	3	11	Yes	SELECTED	NOT SELECTED	RIS	Monthly	Indicator #7 and #9 are similar. I suggest using #7 as it assesses treatment at both at inpatient and outpatient; Indicator #7 of 1.4. is inclusive to indicator # 9 and #10. We can have one indicator for inpatient level (Plan c) and #7 at outpatient level and remove ind #9 (Tit is part of ind#7)
1.4	1	8	MS-2		2. Proportion of all children with dysentry who were correctly prescribed an appropriate course of antibiotics. (91.03)	Processes: EB care, harmful practices, patient-centered practices	Compliance with EB care practices	Provision	Process	Both	4 ASB/Diarrhoea	4	5	3	4	3	3	16		0	4	3	3	10		0		0					0	4	4	3	11	No	NOT SELECTED	NOT SELECTED	RIS	Monthly
1.4	1	9	MS-2		3. Proportion of all children with diarrhoea and severe dehydration who were correctly administered IV fluids according to rehydration plan C. (90.60)	Processes: EB care, harmful practices, patient-centered practices	Compliance with EB care practices inpatient	Provision	Process	Inpatient	4 ASB/Diarrhoea	4	5	3	4	3	3	16		0	4	3	5	12		0		0					0	4	4	3	11	No	NOT SELECTED	NOT SELECTED	RIS	Monthly	Similar to indicator #7
1.4	1	10	MS-2		4. Proportion of all children managed for diarrhoea and some or no dehydration who were correctly prescribed ORS and zinc supplementation. (88.16)	Processes: EB care, harmful practices, patient-centered practices	Compliance with EB care practices inpatient	Provision	Process	Both	4 ASB/Diarrhoea	4	4	4	4	4	4	16		0	4	4	5	13		0		0					0	4	4	5	13	Yes	SELECTED	CORE	RIS	Monthly
1.4	1	11	MS-2		5. Proportion all children treated for diarrhoea and dehydration who were not prescribed medicines to reduce stool frequency (anti-motility agents) (80.54)	Processes: EB care, harmful practices, patient-centered practices	Non-evidence-based, harmful practices	Provision	Process	Both	4 ASB/Diarrhoea	4	4	3	4	3	3	15		0	5	5	3	13		0		0					0	4	4	3	11	Yes	NOT SELECTED	NOT SELECTED	RIS	Monthly
1.4	1	12	MS-2		6. Proportion of all children admitted with diarrhoea who were correctly monitored for their intake of fluids and foods (85.78)	Processes: EB care, harmful practices, patient-centered practices	Compliance with EB care practices inpatient	Provision	Process	Inpatient	4 ASB/Diarrhoea	4	4	3	4	3	3	15		0	4	3	4	11		0		0					0	4	4	3	11	No	NOT SELECTED	NOT SELECTED	RIS	Monthly	Indicator #12 and #13 are similar. Suggest to use #8 as it has more complete definition
1.4	1	13	MS-2		7. Proportion of all children admitted with diarrhoea and dehydration whose fluid intake and feeding were appropriately monitored and documented. (86.05)	Processes: EB care, harmful practices, patient-centered practices	Compliance with EB care practices inpatient	Provision	Process	Inpatient	4 ASB/Diarrhoea	4	4	3	4	3	3	15		0	4	3	4	11		0		0					0	4	4	3	11	No	NOT SELECTED	NOT SELECTED	RIS	Monthly	This indicator is similar to indicator # 9. prefer definition of indicator #7 as it includes proper classification. I would siggest indicator #7 as it will come from routine documentation while this measure would require observation
1.4	1	14	MS-2		8. Proportion of all children with diarrhoea and severe dehydration who could not be managed in the facility who were correctly referred after receiving appropriate prereferral treatment. (83.79)	Processes: EB care, harmful practices, patient-centered practices	Compliance with EB care practices outpatient	Provision	Process	Outpatient	4 ASB/Diarrhoea	4	4	3	4	3	3	15		0	5	3	4	12		0		0					0	4	4	3	11	No	NOT SELECTED	NOT SELECTED	RIS	Monthly	There are few indicators on proper treatment. Perhaps, it might be good to have one indicator on proper classification of diarrhoea based on dehydration and nutrition status assessment and eliminate one or two treatment indicators.
1.4	1	15	MS-2		9. Proportion of all children with persistent diarrhoea who were correctly assessed for dehydration and nutritional status and correctly treated. (86.09)	Processes: EB care, harmful practices, patient-centered practices	Compliance with EB care practices outpatient	Provision	Process	Both	4 ASB/Diarrhoea	4	4	4	4	3	3	16		0	4	4	5	13		0		0					0	4	4	3	11	Yes	SELECTED	NOT SELECTED	RIS	Monthly	This indicator is similar to indicator # 7. prefer definition of indicator #7 as it includes proper classification. I would siggest indicator #7 as it will come from routine documentation while this measure would require observation
1.4	1	17	MS-3		1. Proportion of all children with some dehydration who were successfully rehydrated in the outpatient department and discharged for home treatment. (83.33)	Processes: EB care, harmful practices, patient-centered practices	Compliance with EB care practices outpatient	Provision	Outcome	Both	4 ASB/Diarrhoea	4	4	4	4	3	4	16		0	4	4		8	5	5		0					0	4	4	4	12	Yes	SELECTED	NOT SELECTED	Obs		Outcome; does not need evidence grade
1.4	1	18	MS-3		2. Proportion of all children managed for diarrhoea with severe dehydration in the health facility who died of diarrhoea. (93.48)	Outcomes: clinical condition-specific outcome	Clinical condition-specific outcome inpatient	Provision	Outcome	Inpatient	4 ASB/Diarrhoea	4	4	4	4	3	4	16		0	5			5	5	5		0					0	4	4	4	12	Yes	SELECTED	NOT SELECTED	RIS
1.5	1	1	MS-1		1. The health facility has a written, up-to-date, evidence-based clinical protocol for identifying and managing children with fever that is consistent with WHO guidelines. (93.32)	Inputs: Clinical Guidelines, protocols, job aides	Clinical condition-specific guidelines, protocols, job aides	Provision	Input ClinGuidelin	Both	5 ASB/Asses/Clas/Man/Fever	4	4	3	4			15	4	1.2				0		0		0					0	3	3	2	8	No	NOT SELECTED	NOT SELECTED	InR
1.5	1	2	MS-1		2. The health facility has basic laboratory and diagnostic tests and supplies (e.g. otoscopes, blood glucose tests, malaria smear and/or rapid diagnostic tests, urine tests) available for appropriate assessment of children with fever. (92.68)	Inputs: infrastructure, equipment, supplies clinical condition-specific	Clinical condition-specific medicines, supplies and equipment	Provision	Input InfrastMedSupEquip	Outpatient	5 ASB/Asses/Clas/Man/Fever	4	4	4	4			16	5	5				0		0		0					0	3	3	4	10	Yes	SELECTED	NOT SELECTED	InR
1.5	1	3	MS-1		3. The referral receiving health facility for children with severe febrile illness has appropriate laboratory and diagnostic tests available for further investigation and management. (92.35)	Inputs: infrastructure, equipment, supplies clinical condition-specific	Clinical condition-specific medicines, supplies and equipment	Provision	Input InfrastMedSupEquip	Inpatient	5 ASB/Asses/Clas/Man/Fever	4	3	4	4			15	5	5				0		0		0					0	3	3	4	10	Yes	NOT SELECTED	NOT SELECTED	InR
1.5	1	4	MS-1		4. The health facility has adequate supplies of first- and second-line antibiotics for treatment of bacterial infections and antimalarial agents for treatment of malaria in sufficient quantities for the expected case load with no stock outs. (93.18)	Inputs: infrastructure, equipment, supplies clinical condition-specific	Clinical condition-specific medicines, supplies and equipment	Provision	Input InfrastMedSupEquip	Both	5 ASB/Asses/Clas/Man/Fever	4	4	4	4			16	5	5				0		0		0					0	3	3	4	10	Yes	SELECTED	NOT SELECTED	InR
1.5	1	5	MS-1		5. The health facility clinical staff that care for children receive training and regular refresher sessions in the assessment and management of children with fever at least once every 12 months. (89.71)	Inputs: Human resources	Human resources (specific clinincal training)	Provision	Input HumRes	Both	5 ASB/Asses/Clas/Man/Fever	4	4	4	4	3	4	16		0				0		0		0					0	3	3	3	9	No	NOT SELECTED	NOT SELECTED	Prov
1.5	1	6	MS-2		1. Proportion of all children seen in the health facility for whom a raised temperature was documented in their medical record. (88.57)	Outcomes: clinical condition-specific outcome	Compliance with EB care practices	Provision	Process	Both	5 ASB/Asses/Clas/Man/Fever	4	5	4	4	4	4	17		0	5	5	3	13		0		0					0	4	4	3	11	Yes	SELECTED	NOT SELECTED	RIS	Monthly	instead of raised temperature, I suggest to specify temperature was documented
1.5	1	7	MS-2		2. Proportion of all children admitted to the health facility with fever for whom a documented differential diagnosis was appropriately investigated. (81.63)	Processes: EB care, harmful practices, patient-centered practices	Compliance with EB care practices	Provision	Process	Both	5 ASB/Asses/Clas/Man/Fever	4	4	3	4	4	3	15		0	4	4	4	12		0		0					0	4	4	3	11	No	NOT SELECTED	NOT SELECTED	RIS	Monthly
1.5	1	8	MS-2		3. Proportion of all children treated for malaria for whom there is documented evidence of a positive malaria rapid diagnostic test or positive microscopy. (91.86)	Processes: EB care, harmful practices, patient-centered practices	Compliance with EB care practices	Provision	Process	Both	5 ASB/Asses/Clas/Man/Fever	4	4	3	4	4	4	15		0	4	4	1	9		0		0					0	4	4	3	11	No	NOT SELECTED	NOT SELECTED	RIS	Monthly
1.5	1	9	MS-2		4. Proportion of all children treated for severe malaria who had documented confirmed malaria and evidence of severe disease. (88.52)	Processes: EB care, harmful practices, patient-centered practices	Non-evidence-based, harmful practices	Provision	Process	Both	5 ASB/Asses/Clas/Man/Fever	4	4	4	4	4	4	16		0	5	4	3	12		0		0					0	4	4	3	11	No	NOT SELECTED	NOT SELECTED	RIS	Monthly
1.5	1	10	MS-2		5. Proportion of all children with severe malaria who received the correct treatment (drug, dose, frequency, route of administration and duration) and supportive care according to WHO guidelines. (90.77)	Processes: EB care, harmful practices, patient-centered practices	Compliance with EB care practices	Provision	Process	Both	5 ASB/Asses/Clas/Man/Fever	4	5	3	4	4	4	16		0	5	4	4	13		0		0					0	4	4	5	13	Yes	SELECTED	CORE	RIS	Monthly	suggest to use the definition of 100 core indicator for Malaria treatment
1.5	1	11	MS-2		6. Proportion of all children with severe febrile illness and suspected meningitis for whom there was documented evidence of lumbar puncture in the medical records. (90.34)	Processes: EB care, harmful practices, patient-centered practices	Compliance with EB care practices	Provision	Process	Inpatient	5 ASB/Asses/Clas/Man/Fever	4	3	4	4	4	4	15		0	5	4	4	13		0		0					0	4	4	3	11	Yes	NOT SELECTED	NOT SELECTED	RIS	Monthly
1.5	1	12	MS-2		7. Proportion of all children with meningitis who received correct antibiotic treatment (choice of drug, dose frequency, route of administration and duration) and supportive care according to WHO guidelines. (91.37)	Processes: EB care, harmful practices, patient-centered practices	Compliance with EB care practices	Provision	Process	Inpatient	5 ASB/Asses/Clas/Man/Fever	4	5	3	4	3	3	16		0	5	3	4	12		0		0					0	4	4	3	11	No	NOT SELECTED	NOT SELECTED	RIS	Monthly
1.5	1	13	MS-2		8. Proportion of all children with severe febrile illness (e.g. malaria, meningitis, septicaemia, dengue) who were monitored regularly for vital signs and level of consciousness until resolution of severe signs of illness. (88.36)	Processes: EB care, harmful practices, patient-centered practices	Compliance with EB care practices	Provision	Process	Inpatient	5 ASB/Asses/Clas/Man/Fever	4	5	3	4	3	3	16		0	5	4	4	13		0		0					0	4	4	3	11	Yes	SELECTED	NOT SELECTED	RIS	Monthly
1.5	1	14	MS-2		9. Proportion of all children with severe febrile illness with suspected septicaemia who were appropriately investigated (e.g. full blood count, urine analysis, blood and urine bacteriology culture). (87.27)	Processes: EB care, harmful practices, patient-centered practices	Compliance with EB care practices	Provision	Process	Inpatient	5 ASB/Asses/Clas/Man/Fever	4	5	3	4	3	3	16		0	5	3	4	12		0		0					0	4	4	3	11	No	NOT SELECTED	NOT SELECTED	RIS	Monthly
1.5	1	15	MS-2		10. Proportion of all children treated for septic shock who received the correct antibiotic treatment (choice of drug, dose, frequency, route of administration and duration) and supportive care according to WHO guidelines. (89.74)	Processes: EB care, harmful practices, patient-centered practices	Compliance with EB care practices	Provision	Process	Inpatient	5 ASB/Asses/Clas/Man/Fever	4	5	3	4	3	3	16		0	5	2	5	12		0		0					0	4	4	3	11	No	NOT SELECTED	NOT SELECTED	RIS	Monthly
1.5	1	16	MS-3		1. Proportion of all children treated for severe malaria and/or meningitis who had physical or neurological sequelae. (78.84)	Outcomes: clinical condition-specific outcome	Clinical condition-specific outcome	Provision	Outcome	Inpatient	5 ASB/Asses/Clas/Man/Fever	4	4	4	4	3	4	16		0				0	3	3		0					0	4	4	4	12	No	NOT SELECTED	NOT SELECTED	RIS
1.5	1	17	MS-3		2. Severe malaria case fatality rate disaggregated by age (91.22)	Outcomes: clinical condition-specific outcome	Clinical condition-specific outcome	Provision	Outcome	Inpatient	5 ASB/Asses/Clas/Man/Fever	4	4	4	4	3	4	16		0				0	5	5		0					0	4	3	2	9	Yes	SELECTED	NOT SELECTED	RIS
1.5	1	18	MS-3		3. Meningitis case fatality rate disaggregated by age. (89.56)	Outcomes: clinical condition-specific outcome	Clinical condition-specific outcome	Provision	Outcome	Inpatient	5 ASB/Asses/Clas/Man/Fever	4	4	4	4	3	4	16		0				0	3	3		0					0	4	4	2	10	No	NOT SELECTED	NOT SELECTED	RIS
1.5	1	19	MS-3		4. Proportion of all children treated for septicaemia who died (septicaemia case fatality rate). (90.08)	Outcomes: clinical condition-specific outcome	Clinical condition-specific outcome	Provision	Outcome	Inpatient	5 ASB/Asses/Clas/Man/Fever	4	4	4	4	3	4	16		0				0	5	5		0					0	4	4	4	12	Yes	SELECTED	NOT SELECTED	RIS
1.6	1	1	MS-1		1. The health facility has a written, up-to-date policy for exclusive breastfeeding and appropriate feeding, according to WHO guidelines. (93.37)	Inputs: Operational Guidelines	Operational guidelines, protocols related to client-centered practices	Provision	Input OperGuide	Both	6 RCEB/Nutr/Growth	4	4	4	4	4	3	16	4	1.2				0		0		0					0	3	3	3	9	No	NOT SELECTED	NOT SELECTED	InR
1.6	1	2	MS-1		2. The health facility maintains a baby-friendly status that supports breastfeeding according to WHO guidelines. (89.03)	Inputs: management and oversight	Oversight and management on patient-centered practices	Provision	Input OperGuide	Both	6 RCEB/Nutr/Growth	4	4	4	4	4	3	16	4	1.2				0		0		0					0	3	3	3	9	No	NOT SELECTED	NOT SELECTED	InR
1.6	1	3	MS-1		3. The health facility fully complies with the International Code of marketing of breast-milk substitutes and has systems in place to monitor compliance with the Code. (85.43)	Inputs: management and oversight	Oversight and management on patient-centered practices	Provision	Input OperGuide	Both	6 RCEB/Nutr/Growth	4	4	4	4	4	3	16	4	1.2				0		0		0					0	3	3	3	9	No	NOT SELECTED	NOT SELECTED	InR
1.6	1	4	MS-1		4. The health facility has the necessary supplies and materials to support breastfeeding and, when appropriate, alternative feeding (feeding cups and spoons, infant formula, nasogastric tubes, syringe drivers, IV fluids and tubing). (89.92)	Inputs: infrastructure, equipment, supplies clinical condition-specific	Clinical condition-specific medicines, supplies and equipment	Provision	Input InfrastMedSupEquip	Both	6 RCEB/Nutr/Growth	4	4	4	4	3	4	16	5	5				0		0		0					0	3	3	4	10	Yes	SELECTED	NOT SELECTED	InR
1.6	1	5	MS-1		5. The professional staff of the health facility who care for children receive training and regular refresher sessions in counselling on breastfeeding and optimal feeding and nutrition of infants and young children at least once every 12 months. (88.49)	Inputs: Human resources	Human resources (specific clinincal training)	Provision	Input HumRes	Both	6 RCEB/Nutr/Growth	4	4	4	4	3	4	16		0				0		0		0					0	3	3	3	9	No	NOT SELECTED	NOT SELECTED	Prov
1.6	1	6	MS-1		6. The health facility can regularly assess the competence of staff for supporting carers in sustaining optimal infant and young child feeding and nutrition at least once every 12 months. (79.69)	Inputs: management and oversight	Oversight and management on patient-centered practices	Provision	Input Over&Man	Both	6 RCEB/Nutr/Growth	4	5	3	4	4	4	16	4	2				0		0		0					0	3	3	3	9	No	NOT SELECTED	NOT SELECTED	InR
1.6	1	8	MS-2		2. Proportion of all children < 5 years in the health facility who have been assessed for routine growth and delayed development, as documented on their child health card or booklet. (90.55)	Processes: EB care, harmful practices, patient-centered practices	Compliance with EB care practices outpatient	Provision	Process	Outpatient	6 RCEB/Nutr/Growth	4	4	3	5	3	3	16		0	5	5	3	13		0		0					0	5	4	3	12	Yes	SELECTED	NOT SELECTED	Client	Monthly
1.6	1	9	MS-2		3. Proportion of children aged 6–23 months in the health facility who receive appropriate complementary foods according to WHO guidelines. (81.16)	Processes: EB care, harmful practices, patient-centered practices	Compliance with EB care practices	Provision	Process	Outpatient	6 RCEB/Nutr/Growth	4	4	3	5	3	3	16		0	4	5	3	12		0		0					0	4	4	3	11	No	NOT SELECTED	NOT SELECTED	RIS	Monthly
1.6	1	10	MS-2		4. Proportion of preterm or small sick infants who receive assisted feeding for whom a correctly prescribed feed volume appropriate for their weight and gestation age is documented. (86.84)	Processes: EB care, harmful practices, patient-centered practices	Compliance with EB care practices inpatient	Provision	Process	Inpatient	2 SickYI/Pret/Small	4	4	3	5	3	3	16		0	5	3	4	12		0		0					0	4	3	3	10	No	NOT SELECTED	NOT SELECTED	RIS	Monthly	This indicator is more relevant to Standard #1.2. related to preterm/small young infants. It is also relevant to assess feeding support under standard 1.13 feeding support
1.6	1	12	MS-2		1. Proportion of carers in the health facility who have received counselling on breastfeeding and nutrition to ensure continued, appropriate feeding of the children in their care. (82.94)	Processes: EB care, harmful practices, patient-centered practices	Compliance with EB care practices	Provision	Process	Both	6 RCEB/Nutr/Growth	4	5	3	5	3	3	17		0	4	5	4	13		0		0					0	4	4	3	11	Yes	SELECTED	NOT SELECTED	Pat	Monthly
1.6	1	7	MS-3		1. Proportion of all children aged < 6 months in the health facility who are exclusively breastfed or given only expressed breast milk. (87.18)	Impact/No disease-specific care outcomes	Children under 6 months exclusively breastfed	Provision	Outcome	Outpatient	6 RCEB/Nutr/Growth	4	4	4	4	3	4	16		0	4	5	5	14	5	5		0					0	5	5	5	15	Yes	SELECTED	CORE	RIS	Monthly	Indicator # 10 of 5.5.; #6 of of 6.1., #7 of 1.6. and #15 of 1.2. are the same. The only difference is that here, it also includes outpatient; maybe helpful to highlihjt to measure this indicator among babies who were excluseively breastfed before admission (continue exlusive breastfeeding or expressed milk)
1.6	1	11	MS-3		5. Proportion of all newborn infants in the health facility who receive fully established breastfeeding at the time of discharge. (85.22)	Impact/No disease-specific care outcomes	Children under 6 months exclusively breastfed inpatient	Provision	Outcome	Inpatient	6 RCEB/Nutr/Growth	4	4	4	4	3	4	16		0	4	5	5	14	5	5		0					0	5	4	3	12	Yes	SELECTED	NOT SELECTED	pat	Monthly	The way indicator is described now seems relevant to childbirth services. We may want to further specify or assess it among small/preterm young infans that stay in facility beyond immediate post-partum
1.7	1	1	MS-1		The health facility has written, up-to-date clinical protocols for assessment, identification and management of children with acute malnutrition and anaemia consistent with WHO guidelines. (94.07)	Inputs: Clinical Guidelines, protocols, job aides	Clinical condition-specific guidelines, protocols, job aides	Provision	Input ClinGuidelin	Both	7 ASB/Malnut/Anem	4	4	3	4			15	4	1.2				0		0		0					0	3	3	2	8	No	NOT SELECTED	NOT SELECTED	InR
1.7	1	2	MS-1		The health facility has adequate, functioning equipment (e.g. weighing scales, length and height boards, mid-upper arm circumference tapes) and other supplies for assessing and managing acute malnutrition for the expected case load without stock outs. (94.31)	Inputs: infrastructure, equipment, supplies clinical condition-specific	Clinical condition-specific medicines, supplies and equipment	Provision	Input InfrastMedSupEquip	Outpatient	7 ASB/Malnut/Anem	4	4	4	4	3	4	16	5	5				0		0		0					0	3	3	4	10	Yes	SELECTED	NOT SELECTED	InR
1.7	1	3	MS-1		The health facility has or is linked to an outpatient or community therapeutic feeding centre that provides nutritional support and counselling. (84.82)	Inputs: Organization and availability of health services	Health Care Services (availability)	Provision	Input OrgCare	Both	7 ASB/Malnut/Anem	4	4	4	4	4	4	16	5	3.5				0		0		0					0				0	No	NOT SELECTED	NOT SELECTED	InR
1.7	1	4	MS-1		The health facility that is managing children with complicated severe acute malnutrition has adequate medical and nutrition supplies (e.g. antibiotics, F75, F100, Resomal and ready-to-use therapeutic food) available for the expected case load without stocks-outs. (91.96)	Inputs: infrastructure, equipment, supplies clinical condition-specific	Clinical condition-specific medicines, supplies and equipment inpatient	Provision	Input InfrastMedSupEquip	Inpatient	7 ASB/Malnut/Anem	4	4	4	4	3	4	16	5	5				0		0		0					0	3	3	4	10	Yes	SELECTED	NOT SELECTED	InR
1.7	1	5	MS-1		The health facility has a separate room for all children with complicated severe acute malnutrition, with facilities for keeping them warm (e.g. overhead heaters) and provisions for developmental stimulation. (86.64)	Inputs: infrastructure, equipment, supplies clinical condition-specific	Clinical condition-specific medicines, supplies and equipment inpatient	Provision	Input InfrastMedSupEquip	Inpatient	7 ASB/Malnut/Anem	4	3	4	4	3	4	15	4	4				0		0		0					0	3	3	4	10	Yes	NOT SELECTED	NOT SELECTED	InR
1.7	1	6	MS-1		The professional staff at the health facility who care for children receive training and regular refresher sessions in assessment, identification, appropriate management and follow-up of children with acute malnutrition at least once every 12 months. (89.42)	Inputs: Human resources	Human resources (specific clinincal training)	Provision	Input HumRes	Both	7 ASB/Malnut/Anem	4	4	4	4	3	4	16		0				0		0		0					0	3	3	3	9	No	NOT SELECTED	NOT SELECTED	Prov
1.7	1	7	MS-1		The health facility has basic laboratory and diagnostic tests (e.g. blood glucose, full blood count, blood culture, urinalysis, serum electrolytes, chest X-ray) for appropriate investigation and management of children with complicated severe acute malnutrition. (90.48)	Inputs: infrastructure, equipment, supplies clinical condition-specific	Clinical condition-specific medicines, supplies and equipment inpatient	Provision	Input InfrastMedSupEquip	Inpatient	7 ASB/Malnut/Anem	4	3	4	4	3	4	15	4	4				0		0		0					0	3	3	4	10	Yes	NOT SELECTED	NOT SELECTED	InR
1.7	1	8	MS-2		Proportion of all sick children aged < 5 years seen in the health facility whose nutritional and anaemia status was assessed and classified according to the IMCI guidelines. (89.50)	Processes: EB care, harmful practices, patient-centered practices	Compliance with EB care practices outpatient	Provision	Process	Outpatient	7 ASB/Malnut/Anem	4	4	3	5	3	3	16		0	4	5	4	13		0		0					0	4	4	3	11	Yes	SELECTED	NOT SELECTED	RIS	Monthly
1.7	1	9	MS-2		Proportion of all sick children seen in the health facility whose weight and height were assessed and checked against the recommended WHO growth standards. (90.86)	Processes: EB care, harmful practices, patient-centered practices	Compliance with EB care practices outpatient	Provision	Process	Outpatient	7 ASB/Malnut/Anem	4	4	3	5	3	3	16		0	4	5	3	12		0		0					0	4	4	3	11	No	NOT SELECTED	NOT SELECTED	RIS	Monthly	This indicator is similar to ind #8 under standard 1.6
1.7	1	10	MS-2		Proportion of all children seen in the health facility with uncomplicated severe acute malnutrition who received correct, appropriate outpatient care according to WHO guidelines. (87.21)	Processes: EB care, harmful practices, patient-centered practices	Clinical condition-specific outcome outpatient	Provision	Process	Both	7 ASB/Malnut/Anem	4	4	3	5	3	3	16		0	5	4	4	13		0		0					0	4	4	3	11	Yes	SELECTED	NOT SELECTED	RIS	Monthly
1.7	1	11	MS-2		Proportion of all children admitted to the health facility with complicated severe acute malnutrition whose temperature was measured and recorded on admission. (86.70)	Processes: EB care, harmful practices, patient-centered practices	Compliance with EB care practices inpatient	Provision	Process	Inpatient	7 ASB/Malnut/Anem	4	4	3	5	3	3	16		0	5	3	3	11		0		0					0	4	4	3	11	No	NOT SELECTED	NOT SELECTED	RIS	Monthly
1.7	1	12	MS-2		Proportion of all children admitted to the health facility with complicated severe acute malnutrition whose vital signs, feed intake and weight were regularly and adequately monitored during hospitalization. (88.83)	Processes: EB care, harmful practices, patient-centered practices	Compliance with EB care practices inpatient	Provision	Process	Inpatient	7 ASB/Malnut/Anem	4	4	3	5	3	3	16		0	5	3	4	12		0		0					0	4	4	3	11	No	NOT SELECTED	NOT SELECTED	RIS	Monthly
1.7	1	13	MS-2		Proportion of all children admitted with complicated severe acute malnutrition who received appropriate feeding at a correct frequency both day and night according to WHO guidelines. (86.80)	Processes: EB care, harmful practices, patient-centered practices	Compliance with EB care practices inpatient	Provision	Process	Inpatient	7 ASB/Malnut/Anem	4	4	3	5	3	3	16		0	5	3	3	11		0		0					0	4	4	3	11	No	NOT SELECTED	NOT SELECTED	RIS	Monthly
1.7	1	14	MS-2		Proportion of all children with acute malnutrition whose carers have been counselled and informed about age-appropriate feeding. (83.46)	Processes: EB care, harmful practices, patient-centered practices	Compliance with EB care practices	Provision	Process	Inpatient	7 ASB/Malnut/Anem	4	4	3	5	3	3	16		0	4	4	2	10		0		0					0	4	4	3	11	No	NOT SELECTED	NOT SELECTED	Client	Monthly
1.7	1	15	MS-2		Proportion of all children classified or diagnosed with anaemia who are appropriately investigated and prescribed treatment correctly according to WHO guidelines. (89.09	Processes: EB care, harmful practices, patient-centered practices	Compliance with EB care practices	Provision	Process	Both	7 ASB/Malnut/Anem	4	4	3	5	3	3	16		0	4	5	4	13		0		0					0	4	4	3	11	Yes	SELECTED	NOT SELECTED	RIS	Monthly
1.7	1	16	MS-3		Case fatality rate from complicated severe acute malnutrition (monthly or every 3 months depending on the number of cases managed). (92.54)	Outcomes: clinical condition-specific outcome	Clinical condition-specific outcome inpatient	Provision	Outcome	Inpatient	7 ASB/Malnut/Anem	4	4	4	4	3	4	16		0				0	4	4		0					0	3	3	3	9	Yes	SELECTED	NOT SELECTED	RIS		This indicator is inpatient. Do we want something on caregiver reported ouitcome?
1.8	1	1	MS-1		1. The health facility has written, up-to-date guidance on assessing and managing children with suspected TB infection. (94.19)	Inputs: Clinical Guidelines, protocols, job aides	Clinical condition-specific guidelines, protocols, job aides	Provision	Input ClinGuidelin	Both	8 ASB/TB/HIV	4	4	3	4			15	4	1.2				0		0		0					0	3	3	2	8	No	NOT SELECTED	NOT SELECTED	InR
1.8	1	2	MS-1		2. The health facility offers routine screening for TB symptoms among children at risk (e.g. history of contact with a case of active TB, malnourished or with HIV/AIDS). (89.59)	Inputs: Organization and availability of health services	Health Care Services (availability)	Provision	Input Ser Avail	Outpatient	8 ASB/TB/HIV	3	4	4	3	4	4	14	5	5				0		0		0					0				0	Yes	NOT SELECTED	NOT SELECTED	InR
1.8	1	3	MS-1		3. Health facilities in areas with a high prevalence of HIV infection routinely offer HIV counselling and testing to all children. (91.51)	Inputs: Organization and availability of health services	Health Care Services (availability)	Provision	Input Ser Avail	Both	8 ASB/TB/HIV	3	4	4	3	4	4	14	5	5				0		0		0					0				0	Yes	NOT SELECTED	NOT SELECTED	InR		maybe better to reframe the indicator to collect it form medical documentation
1.8	1	4	MS-1		4. The health facility has child-friendly single or fixed-dose formulations of anti-TB medicines available at all times in adequate quantities without stock outs. (92.33)	Inputs: infrastructure, equipment, supplies clinical condition-specific	Clinical condition-specific medicines, supplies and equipment	Provision	Input InfrastMedSupEquip	Both	8 ASB/TB/HIV	4	4	4	4	3	4	16	5	5				0		0		0					0	3	3	4	10	Yes	SELECTED	NOT SELECTED	InR
1.8	1	5	MS-1		5. The health facility has adequate supplies of antiretroviral therapy and preventive therapy (co-trimoxazole) available at all times for infants and children exposed to and/or infected with HIV. (92.47)	Inputs: infrastructure, equipment, supplies clinical condition-specific	Clinical condition-specific medicines, supplies and equipment	Provision	Input InfrastMedSupEquip	Both	8 ASB/TB/HIV	4	4	4	4	3	4	16	5	5				0		0		0					0	3	3	4	10	Yes	SELECTED	NOT SELECTED	InR
1.8	1	6	MS-1		6. The professional staff at the health facility receive training and regular refresher sessions on TB prevention, case-finding and management at least once every 12 months. (88.00)	Inputs: Human resources	Human resources (specific clinincal training)	Provision	Input HumRes	Both	8 ASB/TB/HIV	4	4	4	4	3	4	16		0				0		0		0					0	3	3	3	9	No	NOT SELECTED	NOT SELECTED	Prov
1.8	1	7	MS-2		1. Proportion of all children with a household contact with active TB who received TB preventive treatment. (83.99)	Processes: EB care, harmful practices, patient-centered practices	Compliance with EB care practices	Provision	Process	Both	8 ASB/TB/HIV	4	4	3	4	3	4	15		0	5	4	5	14		0		0					0	4	4	3	11	Yes	NOT SELECTED	NOT SELECTED	RIS	Monthly
1.8	1	8	MS-2		2. Proportion of all children with suspected TB who were investigated with an Xpert MTB/RIF for diagnosis of TB. (87.88)	Processes: EB care, harmful practices, patient-centered practices	Compliance with EB care practices	Provision	Process	Outpatient	8 ASB/TB/HIV	4	4	3	4	3	4	15		0	5	4	1	10		0		0					0	4	4	3	11	No	NOT SELECTED	NOT SELECTED	RIS	Monthly
1.8	1	9	MS-2		3. Proportion of all children with diagnosed TB who received correct, appropriate treatment (i.e formulation, combination, dose and duration of treatment). (90.49)	Processes: EB care, harmful practices, patient-centered practices	Compliance with EB care practices	Provision	Process	Both	8 ASB/TB/HIV	4	4	4	4	3	4	16		0	5	4	4	13		0		0					0	4	4	3	11	Yes	SELECTED	NOT SELECTED	RIS	Monthly
1.8	1	10	MS-2		4. Proportion of all children with diagnosed multi-drug-resistant TB who were appropriately referred. (89.00)	Inputs: Organization and availability of health services	Organization of care processes (including information exchange, care coordination and referral)	Provision	Process	Outpatient	8 ASB/TB/HIV	4	4	3	4	3	4	15		0	4	4	3	11		0		0					0	4	4	3	11	No	NOT SELECTED	NOT SELECTED	RIS	Monthly	the same as #10 of Standard 1.7.
1.8	1	11	MS-2		5. Proportion of all children started on TB treatment in the health facility who successfully completed the full course. 89.96)	Outcomes: clinical condition-specific outcome	Clinical condition-specific outcome	Provision	Process	Both	8 ASB/TB/HIV	4	5	3	4	3	4	16		0	4	4	5	13		0		0					0	4	4	4	12	Yes	SELECTED	NOT SELECTED	RIS	Monthly	Suggest to use standard WHO Indicator: TB treatment success rate
1.8	1	12	MS-2		6. Proportion of all children who attend health facilities in settings with a high HIV prevalence whose HIV status is known and documented in their medical records. (90.75)	Processes: EB care, harmful practices, patient-centered practices	Compliance with EB care practices	Provision	Process	Both	8 ASB/TB/HIV	4	5	4	4	4	4	17		0	5	4	4	13		0		0					0	4	4	3	11	Yes	SELECTED	NOT SELECTED	RIS	Monthly	Note: this measure will be important in high prevalence settings; The same as Standard #7
1.8	1	13	MS-2		7. Proportion of all HIV-positive women who delivered in the health facility who receive appropriate prophylaxis to prevent mother-to-child transmission and antiretroviral therapy according to WHO guidelines. (94.86)	Processes: EB care, harmful practices, patient-centered practices	Compliance with EB care practices	Provision	Process	Both	8 ASB/TB/HIV	3	5	3	3	4	4	14		0	5	4	4	13		0		0					0	4	4	5	13	Yes	NOT SELECTED	NOT SELECTED	RIS	Monthly	I think this goes bayond child health indicators. Maybe we focus on testing and treatment of exposed/infected infants? Should we measure Maternal prophylaxis or Infant prophylaxis
1.8	1	14	MS-2		8. Proportion of all children born to HIV-infected mothers who were tested for HIV infection within 8 weeks of birth and received appropriate antiretroviral therapy according to WHO guidelines. (92.50)	Processes: EB care, harmful practices, patient-centered practices	Compliance with EB care practices	Provision	Process	Outpatient	8 ASB/TB/HIV	4	5	3	4	4	4	16		0	5	4	4	13		0		0					0	5	5	3	13	Yes	SELECTED	CORE	RIS	Monthly	we just may split this on two (tested) and second below will be treated
1.8	1	15	MS-2		9. Proportion of all children with confirmed HIV infection who have started antiretroviral therapy. (96.05)	Processes: EB care, harmful practices, patient-centered practices	Compliance with EB care practices	Provision	Process	Outpatient	8 ASB/TB/HIV	4	5	4	4	4	4	17		0	5	4	4	13		0		0					0	4	4	3	11	Yes	SELECTED	NOT SELECTED	RIS	Monthly	Note: indicator #14 includes #15. therefore, it is not selected separately. Alternatively, we can focus #14 on testing and #15 on treatment. Note: 100 core monitors AIDS related mortality and Viral load supression (3rd 95 target). This one focuses on 1st two targets, but may be difficult to measure
1.8	1	16	MS-3		1. Cure rate for childhood TB infection in the health facility. (83.58)	Outcomes: clinical condition-specific outcome	Clinical condition-specific outcome	Provision	Outcome	Outpatient	8 ASB/TB/HIV	4	4	4	4	4	4	16		0				0	4	4		0					0	4	4	5	13	Yes	SELECTED	CORE	RIS	Monthly	Can be standardized as TB treatment success rate as standard 100 core measure
1.8	1	17	MS-3		2. Case fatality rate among children with HIV infection in the facility. (88.71)	Outcomes: clinical condition-specific outcome	Clinical condition-specific outcome inpatient	Provision	Outcome	Inpatient	8 ASB/TB/HIV	4	4	4	4	4	4	16		0				0	4	4		0					0	4	4	4	12	Yes	SELECTED	NOT SELECTED	RIS		do we need ART retention rate? It would be more impactful. As it is 100 core indicator; Or viral load suppression as it is part of 90-90-90 target
1.9	1	1	MS-1		1. The health facility has written, up-to-date protocols and guidelines for providing routine child immunization services that are consistent with WHO guidelines. (95.16)	Inputs: Clinical Guidelines, protocols, job aides	Clinical condition-specific guidelines, protocols, job aides	Provision	Input ClinGuidelin	Outpatient	9 RCEB/Vaccin/VitA	4	4	3	4			15	4	1.2				0		0		0					0	3	3	2	8	No	NOT SELECTED	NOT SELECTED	InR
1.9	1	2	MS-1		2. The health facility has a functioning refrigerator with a temperature monitoring device and sufficient storage capacity to accommodate all the vaccines required for the expected case load. (95.69)	Inputs: infrastructure, equipment, supplies clinical condition-specific	Clinical condition-specific medicines, supplies and equipment	Provision	Input InfrastMedSupEquip	Outpatient	9 RCEB/Vaccin/VitA	4	4	4	4	4	4	16	5	5				0		0		0					0	3	3	4	10	Yes	SELECTED	NOT SELECTED	InR
1.9	1	3	MS-1		3. The health facility has adequate supplies of immunization cards, tally sheets, ice packs and other supplies to provide daily immunization services at all times with no stock outs. (93.66)	Inputs: infrastructure, equipment, supplies clinical condition-specific	Clinical condition-specific medicines, supplies and equipment	Provision	Input InfrastMedSupEquip	Both	9 RCEB/Vaccin/VitA	4	4	4	4	3	4	16	3	3				0		0		0					0	3	3	4	10	No	NOT SELECTED	NOT SELECTED	InR
1.9	1	4	MS-1		4. The health facility has adequate supplies of all age-appropriate primary vaccines and human papillomavirus available to provide daily immunization services with no stock outs. (92.81)	Inputs: infrastructure, equipment, supplies clinical condition-specific	Clinical condition-specific medicines, supplies and equipment	Provision	Input InfrastMedSupEquip	Both	9 RCEB/Vaccin/VitA	4	4	4	4	4	4	16	5	5				0		0		0					0	3	3	4	10	Yes	SELECTED	NOT SELECTED	InR
1.9	1	5	MS-1		5. The health facility has adequate supplies of puncture-resistant, rigid, leak-resistant containers designed to hold used sharps safely during collection, disposal and destruction. (91.51)	Inputs: infrastructure, equipment, supplies clinical condition-specific	Clinical condition-specific medicines, supplies and equipment	Provision	Input InfrastMedSupEquip	Both	9 RCEB/Vaccin/VitA	4	4	4	4	3	4	16	3	3				0		0		0					0	3	3	4	10	No	NOT SELECTED	NOT SELECTED	InR
1.9	1	6	MS-1		6. The health facility has at least one health professional trained in immunization service delivery, who receives regular refresher sessions at least once every 24 months. (89.51)	Inputs: Human resources	Human resources (specific clinincal training)	Provision	Input HumRes	Both	9 RCEB/Vaccin/VitA	4	4	4	4	3	4	16		0				0		0		0					0	3	3	3	9	No	NOT SELECTED	NOT SELECTED	InR
1.9	1	7	MS-1		1. Proportion of days on which the refrigerator temperature, monitored twice daily, was not out of the range 2–8 ªC in the past month. (88.19)	Inputs: management and oversight	Oversight and management on cross-cutting supporting systems	Provision	Input Over&Man	Both	9 RCEB/Vaccin/VitA	4	5	3	4	4	4	16	4	2				0		0		0					0	3	3	3	9	No	NOT SELECTED	NOT SELECTED	InR
1.9	1	8	MS-2		2. Proportion of all children seen in the health facility whose vaccination and vitamin A status was checked. (88.46)	Processes: EB care, harmful practices, patient-centered practices	Compliance with EB care practices	Provision	Process	Outpatient	9 RCEB/Vaccin/VitA	4	4	4	4	4	4	16		0	4	5	4	13		0		0					0	4	4	4	12	Yes	SELECTED	NOT SELECTED	RIS	Monthly
1.9	1	9	MS-2		3. Proportion of all children under 5 years of age who attended the health facility and received vitamin A supplementation in the past 6 months. (86.33)	Processes: EB care, harmful practices, patient-centered practices	Compliance with EB care practices outpatient	Provision	Process	Outpatient	9 RCEB/Vaccin/VitA	4	5	3	4	4	4	16		0	4	5	4	13		0		0					0	4	4	3	11	Yes	SELECTED	NOT SELECTED	RIS	Monthly
1.9	1	10	MS-2		4. Proportion of all carers whose children are eligible for the next dose of vaccine who were counselled and know when to return. (80.76)	Processes: EB care, harmful practices, patient-centered practices	Compliance with EB care practices outpatient	Provision	Process	Outpatient	9 RCEB/Vaccin/VitA	4	4	2	4	3	3	14		0	4	5	4	13		0		0					0	4	4	3	11	Yes	NOT SELECTED	NOT SELECTED	Obs	Monthly
1.9	1	11	MS-3		1. Proportion of all children under 5 years of age who attended the health facility and left without receiving age-appropriate, up-to-date vaccination according to the guidelines of the WHO expanded programme on immunization. (81.62)	Impact/No disease-specific care outcomes	Impact outpatient ( e.g full vaccination)	Provision	Outcome	Both	9 RCEB/Vaccin/VitA	5	5	3	5	4	3	18		0				0	5	5		0					0	4	4	5	13	Yes	SELECTED	CORE	Obs	Monthly	This indicator is similar to indicator #12 (that measures ony in inpatient).I would suggest to use positive measure: proportion of children visited health care facilities who were fully vaccinated at their age and use it both inpatient and outpatient
1.9	1	12	MS-3		2. Proportion of all children admitted to the health facility for more than 24 h who were not fully vaccinated for their age. (84.73)	Impact/No disease-specific care outcomes	Impact inpatient (no clinical content-specific outcomes e.g institutional child mortality)	Provision	Outcome	Both	9 RCEB/Vaccin/VitA	5	5	3	5	4	3	18		0				0	5	5		0					0	4	4	4	12	Yes	SELECTED	NOT SELECTED	Client		Similar to indicator #11. Suggest to use the measure #11 above with proposed modificaton
1.10	1	1	MS-1		1. The health facility has written, up-to-date policies, protocols and guidelines for screening, managing and ensuring the continuity of care in the community for children with common chronic conditions. (89.32)	Inputs: Clinical Guidelines, protocols, job aides	Clinical condition-specific guidelines, protocols, job aides	Provision	Input ClinGuidelin	Both	10 ASB/Chronic/Con	4	4	3	4			15	4	1.2				0		0		0					0	3	3	2	8	No	NOT SELECTED	NOT SELECTED	InR
1.10	1	2	MS-1		2. The health facility has a model for chronic care that includes a coordinated, multidisciplinary team approach and the participation of children and their families. (81.32)	Inputs: Operational Guidelines	Operational guidelines, protocols related to care provision	Provision	Input OperGuide	Outpatient	10 ASB/Chronic/Con	4	4	4	4	4	3	16	4	1.2				0		0		0					0	3	3	3	9	No	NOT SELECTED	NOT SELECTED	InR
1.10	1	3	MS-1		3. The health facility has the facilities, supplies and materials necessary to provide optimal care during both acute episodes and routine follow-up of children with chronic conditions. (88.08)	Inputs: infrastructure, equipment, supplies clinical condition-specific	Clinical condition-specific medicines, supplies and equipment	Provision	Input InfrastMedSupEquip	Outpatient	10 ASB/Chronic/Con	4	4	4	4	3	3	16	5	5				0		0		0					0	3	3	4	10	Yes	SELECTED	NOT SELECTED	InR
1.10	1	4	MS-1		4. Health professionals receive in-service training or refresher sessions in the appropriate care of common chronic childhood conditions (e.g. asthma, sickle-cell disease, diabetes, epilepsy and cardiac disease) at least once every 12 months. (87.81)	Inputs: Human resources	Human resources (specific clinincal training)	Provision	Input HumRes	Outpatient	10 ASB/Chronic/Con	4	4	4	4	3	4	16		0				0		0		0					0	3	3	3	9	No	NOT SELECTED	NOT SELECTED	Prov
1.10	1	5	MS-1		5. The health facility has an established system for age-appropriate education and counselling for children about their condition, self-management and prevention of complications. (81.45)	Inputs: Operational Guidelines	Operational guidelines, protocols related to client-centered practices	Provision	Input OperGuide	Both	10 ASB/Chronic/Con	4	4	4	4	4	3	16	4	1.2				0		0		0					0	3	3	3	9	No	NOT SELECTED	NOT SELECTED	InR
1.10	1	9	MS-1		4. Proportion of health professionals who care for children in the health facility who have received in-service training or refresher sessions in appropriate care of common chronic childhood conditions at least once every 12 months. (87.77)	Inputs: Human resources	Human resources (specific clinincal training)	Provision	Input HumRes	Both	10 ASB/Chronic/Con	4	4	4	4	3	4	16		0				0		0		0					0	3	3	3	9	No	NOT SELECTED	NOT SELECTED	Prov		The same as indicator #4 standard 1.10
1.10	1	8	MS-2		3. Proportion of children who require palliative care, whose physical and emotional care, including pain, side-effects and other symptoms, is assessed and documented. (83.92)	Processes: EB care, harmful practices, patient-centered practices	Compliance with EB care practices	Provision	Process	Both	10 ASB/Chronic/Con	4	4	3	4	3	3	21		0	5	5	3	13		0		0					0	4	3	3	10	Yes	SELECTED	NOT SELECTED	RIS	Monthly	NCD preventive measures: physical activity, sugar intake are not included in the standards
1.10	1	10	MS-3		1. Proportion of all children with asthma who are followed at the health facility who were admitted with a severe acute asthmatic attack in the past 3 months. (85.64)	Outcomes: clinical condition-specific outcome	Compliance with EB care practices outpatient	Provision	Outcome	Both	10 ASB/Chronic/Con	4	4	3	5	3	3	16		0	5	3		8	4	4		0					0				0	Yes	SELECTED	NOT SELECTED	Client		This is outcome measure. NCD preventive measures: physical activity, sugar intake are not included in the standards; There are no process measures for chronic conditions: suggest to include 1-2 process measures for Asthma detection and management.
1.10	1	11	MS-3		2. Proportion of all children with chronic, repeated seizures (epilepsy) who are followed up at the health facility who were admitted with status epilepticus in the past 12 months. (85.55)	Outcomes: clinical condition-specific outcome	Compliance with EB care practices outpatient	Provision	Outcome	Both	10 ASB/Chronic/Con	4	4	3	4	3	3	15		0	5	3		8	4	4		0					0				0	Yes	NOT SELECTED	NOT SELECTED	Client		This is outcome measure NCD preventive measures: physical activity, sugar intake are not included in the standards;
1.10	1	12	MS-3		3. Proportion of children with a chronic condtion who know and can correctly describe the signs and symptoms that alert them to seek care for their condition. (80.52)	Outcomes: clinical condition-specific outcome	Clinical condition-specific outcome	Provision	Outcome	Both	10 ASB/Chronic/Con	4	5	3	5	3	3	17		0				0	4	4		0					0				0	Yes	SELECTED	NOT SELECTED	Client
1.10	1	7	MS-3		2. Proportion of children with a chronic condition and/or their carers who understand and are able to describe their condition and the treatment being received correctly. (78.31)	Outcomes: clinical condition-specific outcome	Clinical condition-specific outcome	Provision	Outcome	Both	10 ASB/Chronic/Con	4	5	3	5	3	3	17		0	3	3	4	10	4	4		0					0				0	Yes	SELECTED	NOT SELECTED	Client
1.11	1	1	MS-1		1. The health facility has a comprehensive written protocol for identifying, assessing and managing children with suspected maltreatment. (90.57)	Inputs: Operational Guidelines	Operational guidelines, protocols related to client-centered practices	Provision	Input OperGuide	Both		4	4	4	4	4	3	16	4	1.2				0		0		0					0	3	3	3	9	No	NOT SELECTED	NOT SELECTED	InR		standard 1.11 can be inclrporated in non-clinical specific standards, such as standard 5
1.11	1	2	MS-1		2. The health facility staff receive training and refresher sessions on screening, preventing, protecting and managing children with evidence of maltreatment, including neglect and violence. (88.56)	Inputs: Human resources	Human resources: specific non-clinical training	Provision	Input HumRes	Both		4	4	4	4	3	4	16		0				0		0		0					0	3	3	3	9	No	NOT SELECTED	NOT SELECTED	Prov		standard 1.11 can be inclrporated in non-clinical specific standards, such as standard 6
1.11	1	3	MS-1		3.The health facility has the facilities, supplies and materials to provide optimal, coordinated care to children with suspected maltreatment. (86.67	Inputs: Infrastructure, equipment client-centered	Infrastructure for client-centered practices	Provision	Input InfrastMedSupEquip	Both		4	4	4	4	3	3	16	5	5				0		0		0					0	3	3	4	10	Yes	SELECTED	NOT SELECTED	InR		standard 1.11 can be inclrporated in non-clinical specific standards, such as standard 7
1.11	1	4	MS-2		1. Proportion of all children with suspected maltreatment who were managed according to established health facility procedures and protocols. (82.17)	Inputs: management and oversight	Oversight and management on patient-centered practices	Provision	Process	Both		4	4	3	4	3	3	15		0	5	5	2	12		0		0					0	4	3	3	10	No	NOT SELECTED	NOT SELECTED	InR	Monthly	standard 1.11 can be incorporated in non-clinical specific standards, such as standard 8
1.11	1	5	MS-2		2. Proportion of all children attending the health facility with suspected maltreatment who received psychological services (82.52)	Inputs: Organization and availability of health services	Health Care Services (availability)	Provision	Process	Both		4	5	3	4	3	3	16		0	5	5	3	13		0		0					0	4	4	3	11	Yes	SELECTED	NOT SELECTED	InR	Monthly	standard 1.11 can be incorporated in non-clinical specific standards, such as standard 9
1.11	1	6	MS-2		1. Proportion of children with maltreatment for whom a legal opinion was requested. (78.62)	Inputs: management and oversight	Oversight and management on patient-centered practices	Provision	Process	Both		4	4	3	4	3	3	15		0	5	5	2	12		0		0					0	4	3	3	10	No	NOT SELECTED	NOT SELECTED	InR	Monthly	standard 1.11 can be incorporated in non-clinical specific standards, such as standard 10
1.11	1	7	MS-2		2. Proportion of maltreatment events in which coordination was sought with other agencies or organizations (e.g. social services, police, judiciary) according to national laws and policies. (82.21)	Inputs: Organization and availability of health services	Organization of care processes (including information exchange, care coordination and referral)	Provision	Process	Both		4	5	3	4	3	3	16		0	5	5	3	13		0		0					0	4	4	3	11	Yes	SELECTED	NOT SELECTED	InR	Monthly	standard 1.11 can be incorporated in non-clinical specific standards, such as standard 11
1.12	1	1	MS-1		1. The health facility has written, up-to-date clinical protocols for emergency triage and assessment and appropriate case management of paediatric trauma and surgical conditions, consistent with WHO guidelines. (94.31)	Inputs: Clinical Guidelines, protocols, job aides	Clinical condition-specific guidelines, protocols, job aides	Provision	Input ClinGuidelin	Both	12 Surg/injur	4	4	3	4			15	4	1.2				0		0		0					0	3	3	2	8	No	NOT SELECTED	NOT SELECTED	InR
1.12	1	2	MS-1		2. The health facility that provides surgical care for children has a system to ensure a coordinated multidisciplinary team that includes a health professional with competence and skills in child surgery. (84.65)	Inputs: Operational Guidelines	Operational guidelines, protocols related to client-centered practices	Provision	Input OperGuide	Both	12 Surg/injur	4	4	4	4	4	3	16	4	1.2				0		0		0					0	3	3	3	9	No	NOT SELECTED	NOT SELECTED	InR
1.12	1	3	MS-1		3. Health professionals receive in-service training and refresher sessions in appropriate care of child injuries, trauma and other common paediatric surgical conditions at least once every 12 months. (87.73)	Inputs: Human resources	Human resources (specific clinincal training)	Provision	Input HumRes	Both	12 Surg/injur	4	4	4	4	3	4	16		0				0		0		0					0	3	3	3	9	No	NOT SELECTED	NOT SELECTED	InR
1.12	1	4	MS-1		4. The health facility has a designated area for the management of children with surgical problems by health professionals who are trained or who have knowledge and skills in child care. (89.07)	Inputs: infrastructure, equipment, supplies clinical condition-specific	Clinical condition-specific infrastructure inpatient	Provision	Input InfrastMedSupEquip	Inpatient	12 Surg/injur	4	4	4	4	3	3	16	5	5				0		0		0					0	3	3	4	10	Yes	SELECTED	NOT SELECTED	InR
1.12	1	5	MS-1		5. All children who have undergone surgery are closely monitored, with careful documentation of intake (fluids and feeds) and output (e.g. urine, nasogastric drainage). (89.30)	Processes: EB care, harmful practices, patient-centered practices	Compliance with EB care practices inpatient	Provision	Process	Inpatient	12 Surg/injur							0		#N/A	5	3	4	12		0		0					0				0	#N/A	#N/A	#N/A	RIS
1.12	1	6	MS-2		1. Proportion of children undergoing major surgery who received appropriate perioperative antibiotic prophylaxis within 30 min of incision, when indicated. (86.23)	Processes: EB care, harmful practices, patient-centered practices	Compliance with EB care practices inpatient	Provision	Process	Inpatient	12 Surg/injur	4	5	3	4	3	3	16		0	5	4	4	13		0		0					0	4	4	3	11	Yes	SELECTED	NOT SELECTED	RIS	Monthly
1.12	1	7	MS-1		2. Proportion of all children undergoing surgery who were admitted to a designated paediatric area staffed by health professionals trained in child care. (84.45)	Inputs: Human resources	Human resources (staff clinincal training) inpatient	Provision	Input HumRes	Inpatient	12 Surg/injur	4	4	3	4	3	4	15		0				0		0		0					0	3	3	3	9	No	NOT SELECTED	NOT SELECTED	InR
1.12	1	8	MS-2		3. Proportion of all children with trauma or injuries who were assessed within 15 min of arrival at the health facility. (87.70)	Processes: EB care, harmful practices, patient-centered practices	Compliance with EB care practices	Provision	Process	Both	12 Surg/injur	4	5	3	4	3	3	16		0	5	4	5	14		0		0					0	4	4	3	11	Yes	SELECTED	NOT SELECTED	RIS	Monthly	This indicator is also relevant to Standard 1.1.
1.12	1	9	MS-2		4. Proportion all children with moderate or severe pain whose pain was relieved (where indicated) within 30 min of arrival at the health facility. (83.89)	Processes: EB care, harmful practices, patient-centered practices	Compliance with EB care practices inpatient	Provision	Process	Inpatient	12 Surg/injur	4	5	2	4	3	3	15		0	5	4	4	13		0		0					0	4	4	3	11	Yes	NOT SELECTED	NOT SELECTED	RIS	Monthly
1.12	1	10	MS-3		1. Health facility complication rates for patients who underwent surgery. (89.88)	Outcomes: clinical condition-specific outcome	Clinical condition-specific outcome inpatient	Provision	Outcome	Inpatient	12 Surg/injur	4	5	3	5	3	3	17		0				0	4	4		0					0	3	3	4	10	Yes	SELECTED	NOT SELECTED	RIS
1.12	1	11	MS-3		2. Health facility mortality rate for all children who underwent surgery. (95.70)	Outcomes: clinical condition-specific outcome	Clinical condition-specific outcome inpatient	Provision	Outcome	Inpatient	12 Surg/injur	4	5	3	4	3	3	16		0				0	4	4		0					0	4	4	5	13	Yes	SELECTED	CORE	RIS	Monthly	In 100 core, there is a standardized indicator, which is named as Perioperative mortality. I suggest to use this term
1.12	1	12	MS-3		3. Case fatality rate of children with trauma and/or injuries. (94.64)	Outcomes: clinical condition-specific outcome	Clinical condition-specific outcome inpatient	Provision	Outcome	Inpatient	12 Surg/injur	4	5	3	3	3	3	15		0				0	4	4		0					0	3	3	4	10	Yes	NOT SELECTED	NOT SELECTED	RIS		Trauma and injuries have not prioretized as some of these will be included in surgeries anyway
1.13	1	1	MS-1		1. The health facility has written, up-to-date protocols for monitoring and providing supportive care for various conditions for all children admitted to the wards. (91.11)	Inputs: Operational Guidelines	Operational guidelines, protocols related to care provision inpatient	Provision	Input OperGuide	Inpatient	13 Support/Sick	4	4	4	4	4	3	16	4	1.2				0		0		0					0	3	3	3	9	No	NOT SELECTED	NOT SELECTED	InR
1.13	1	2	MS-1		2. The health facility has age-appropriate patient monitoring charts that include a provision for recording details of clinical progress and vital signs and of the treatment and supportive care provided. (92.60)	Input Heal&Sys	Standardized medical documentation and forms Inpatient	Provision	Input Heal&Sys	Inpatient	13 Support/Sick	3	4	4	3	3	3	14		0				0		0		0					0				0	No	NOT SELECTED	NOT SELECTED	InR		also relevant for Standard #2
1.13	1	3	MS-1		3. The health facility has a designated area for managing seriously sick children that is close and easily visible to the nursing staff on the ward. (93.03)	Inputs: infrastructure, equipment, supplies clinical condition-specific	Clinical condition-specific infrastructure inpatient	Provision	Input InfrastMedSupEquip	Inpatient	13 Support/Sick	4	4	4	4	3	4	16	5	5				0		0		0					0	3	3	4	10	Yes	SELECTED	NOT SELECTED	InR
1.13	1	4	MS-1		4. Health professionals receive in-service training and regular refresher sessions on patient monitoring and supportive care at least once every 12 months. (89.55)	Inputs: Human resources	Human resources (staff clinincal training) inpatient	Provision	Input HumRes	Inpatient	13 Support/Sick	4	4	4	4	3	4	16		0				0		0		0					0	3	3	3	9	No	NOT SELECTED	NOT SELECTED	Prov
1.13	1	5	MS-2		5. Proportion of all unconscious children admitted to the wards who received a nasogastric tube for feeding. (82.66)	Processes: EB care, harmful practices, patient-centered practices	Compliance with EB care practices inpatient	Provision	Process	Inpatient	13 Support/Sick	4	5	3	4	3	3	16		0	5	3	4	12		0		0					0	4	4	3	11	No	NOT SELECTED	NOT SELECTED	RIS	Monthly
1.13	1	6	MS-2		6. Proportion of all severely ill children who cannot feed orally for whom blood glucose monitoring is documented on their observation chart. (88.78)	Processes: EB care, harmful practices, patient-centered practices	Compliance with EB care practices inpatient	Provision	Process	Inpatient	13 Support/Sick	4	5	3	4	3	3	16		0	5	3	4	12		0		0					0	4	4	3	11	No	NOT SELECTED	NOT SELECTED	RIS	Monthly
1.13	1	7	MS-2		7. Proportion of all children who received oxygen for which the prescribed method and rate of delivery are documented. (87.47)	Processes: EB care, harmful practices, patient-centered practices	Compliance with EB care practices inpatient	Provision	Process	Inpatient	13 Support/Sick	4	5	3	4	3	3	16		0	5	3	4	12		0		0					0	4	4	3	11	No	NOT SELECTED	NOT SELECTED	RIS	Monthly
1.13	1	8	MS-2		8. Proportion of all children admitted to the health facility who were appropriately monitored and for whom observations were recorded by a nurse according to the guidelines. (88.56)	Processes: EB care, harmful practices, patient-centered practices	Compliance with EB care practices inpatient	Provision	Process	Inpatient	13 Support/Sick	4	4	3	4	3	3	15		0	5	4	4	13		0		0					0	4	4	3	11	Yes	NOT SELECTED	NOT SELECTED	RIS	Monthly
1.13	1	9	MS-2		9. Proportion of all children admitted to the health facility who are reassessed every working day by a clinician trained in child health care. (87.16)	Processes: EB care, harmful practices, patient-centered practices	Compliance with EB care practices inpatient	Provision	Process	Inpatient	13 Support/Sick	4	5	2	4	3	3	15		0	5	5	3	13		0		0					0	4	4	3	11	Yes	NOT SELECTED	NOT SELECTED	RIS	Monthly
1.13	1	10	MS-2		10. Proportion of all children with convulsions who were appropriately investigated and correctly prescribed anticonvulsant treatment (appropriate choice, dose and frequency). (89.29)	Processes: EB care, harmful practices, patient-centered practices	Compliance with EB care practices inpatient	Provision	Process	Inpatient	13 Support/Sick	4	5	3	4	3	3	16		0	5	3	5	13		0		0					0	4	4	3	11	Yes	SELECTED	NOT SELECTED	RIS	Monthly
1.13	1	11	MS-2		11. Proportion of all children who required antipyretics who were prescribed the correct treatment (appropriate choice, dose and frequency) to reduce their temperature. (86.15)	Processes: EB care, harmful practices, patient-centered practices	Compliance with EB care practices inpatient	Provision	Process	Inpatient	13 Support/Sick	4	4	3	4	3	3	15		0	5	4	4	13		0		0					0	4	4	3	11	Yes	NOT SELECTED	NOT SELECTED	RIS	Monthly
1.13	1	12	MS-2		12. Proportion of all children in pain for whom analgesic treatment was correctly prescribed (appropriate choice, dose and frequency). (85.23)	Processes: EB care, harmful practices, patient-centered practices	Compliance with EB care practices inpatient	Provision	Process	Inpatient	13 Support/Sick	4	5	3	4	3	3	16		0	5	4	4	13		0		0					0	4	4	3	11	Yes	SELECTED	NOT SELECTED	RIS	Monthly
1.13	1	13	MS-2		13. Proportion of all children who required a blood transfusion for severe anaemia who received the transfusion. (90.91)	Processes: EB care, harmful practices, patient-centered practices	Compliance with EB care practices inpatient	Provision	Process	Inpatient	13 Support/Sick	4	4	4	4	3	3	16		0	5	2	3	10		0		0					0	4	4	3	11	No	NOT SELECTED	NOT SELECTED	RIS	Monthly	Important features, such as counselling and discharge from hospital would be good to address by this standard as part of supportive care provided to sick child
1.13	1	14	MS-3		5. Proportion of all severely ill children who died in the health facility whose death was attributed to aspiration. (78.23)	Outcomes: clinical condition-specific outcome	Clinical condition-specific outcome inpatient	Provision	Outcome	Inpatient	13 Support/Sick	4	4	3	5	3	3	16		0				0	4	4		0					0				0	Yes	SELECTED	NOT SELECTED	RIS
1.14	1	1	MS-1		1. The health facility has written, up-to-date guidelines, protocols and standard operating procedures for the prevention and control of infection in the facility. (95.66)	Inputs: Operational Guidelines	Operational guidelines, protocols related to cross-cutting supporting systems (management, human resources, health information system, infrastructure, supplies and equipment, health financing, organization of health services)	Provision	Input OperGuide	Both	14 IPC/WASH	4	4	4	4	4	3	16	4	1.2				0		0		0					0	3	3	3	9	No	NOT SELECTED	NOT SELECTED	InR		1.14 statement can be incorporated in quality statement 8.2.
1.14	1	2	MS-1		2. The health facility has specific guidelines and protocols on hand hygiene and aseptic technique and device management for clinical procedures (e.g. injection safety, use of indwelling catheters and other invasive procedures). (95.15)	Inputs: Operational Guidelines	Operational guidelines, protocols in place (WASH-related)	Provision	Input OperGuide	Both	14 IPC/WASH	4	4	4	4	4	3	16	4	1.2				0		0		0					0	3	3	3	9	No	NOT SELECTED	NOT SELECTED	InR		1.14 statement can be incorporated in quality statement 8.2.
1.14	1	3	MS-1		3. The health facility has plans for infection prevention and control preparedness and response for public health emergencies due to communicable diseases (e.g. pandemics). (91.43)	Inputs: Operational Guidelines	Operational guidelines, protocols related to cross-cutting supporting systems (management, human resources, health information system, infrastructure, supplies and equipment, health financing, organization of health services)	Provision	Input OperGuide	Both	14 IPC/WASH	4	4	4	4	4	3	16	4	1.2				0		0		0					0	3	3	3	9	No	NOT SELECTED	NOT SELECTED	InR		1.14 statement can be incorporated in quality statement 8.2.
1.14	1	4	MS-1		4. The health facility has a functioning improved water source and hand-washing stations with soap and single-use hand towels and/or alcohol-based hand rub in all wards and consulting rooms. (95.82)	Inputs: Infrastructure, equipment, supplies cross-cutting	Infrastructure/equipment cross-cutting (e.g. WASH)	Provision	Input InfrastMedSupEquip	Both	14 IPC/WASH	4	4	4	4	4	4	16	5	5				0		0		0					0	3	3	4	10	Yes	SELECTED	NOT SELECTED	InR		Suggested revision from meg: The health facility has a functioning improved water source and has functional hand-washing stations with soap and water or and single-use hand towels and/or alcohol-based hand rub in all wards, and consulting rooms and near toilets. (95.82) 1.14 statement can be incorporated in quality statement 8.2. Inputs are not paediatric QoC relevant: they are cross-cutting
1.14	1	5	MS-1		5. The health facility has appropriate sterilizing facilities and disinfectants for medical materials. (95.94)	Inputs: Infrastructure, equipment, supplies cross-cutting	Supplies and equipment cross-cutting (essential medicines)	Provision	Input InfrastMedSupEquip	Both	14 IPC/WASH	4	4	4	4	3	4	16	5	5				0		0		0					0	3	3	4	10	Yes	SELECTED	NOT SELECTED	InR		1.14 statement can be in Inputs are not paediatric QoC relevant: they are cross-cuttingcorporated in quality statement 8.2.
1.14	1	6	MS-1		6. The health facility has a functioning incinerator or other appropriate method for treatment of infectious waste and used instruments. (95.73)	Inputs: Infrastructure, equipment, supplies cross-cutting	Supplies and equipment cross-cutting (essential medicines)	Provision	Input InfrastMedSupEquip	Both	14 IPC/WASH	4	4	4	4	3	4	16	5	5				0		0		0					0	3	3	4	10	Yes	SELECTED	NOT SELECTED	InR		Suggested revision from Meg: The health facility has a functioning incinerator or other appropriate method for treatment of health care waste 1.14 statement can be incorporated in quality statement 8.2. Inputs are not paediatric QoC relevant: they are cross-cutting
1.14	1	7	MS-1		7. The health facility has a system to ensure safe handling, collection, storage (puncture resistant) and final disposal of infectious waste. (95.00)	Inputs: management and oversight	Oversight and management on cross-cutting supporting systems	Provision	Input OperGuide	Both	14 IPC/WASH	4	4	4	4	4	3	16	5	1.5				0		0		0					0	3	3	3	9	No	NOT SELECTED	NOT SELECTED	InR		Suggested revisin from Meg: The health facility has a system to ensure safe handling, collection, storage (puncture resistant) and final treatment and disposal of infectious waste. 1.14 statement can be incorporated in quality statement 8.2.
1.14	1	8	MS-1		8. The health facility has at least one designated trained staff member and/or infection control team, with a sufficient budget to perform the tasks of the facility infection prevention and control programme. (89.97)	Inputs: financing	Financing of cross-cutting supporting systems (energy, fuel for vehicles)	Provision	Input Financing	Both	14 IPC/WASH	4	3	4	4	4	4	15	5	1.5				0		0		0					0	2	2	3	7	No	NOT SELECTED	NOT SELECTED	InR		1.14 statement can be incorporated in quality statement 8.2.
1.14	1	9	MS-1		9. Health professionals who care for children receive training in standard infection prevention and control at least once every 12 months. (89.99)	Inputs: Human resources	Human resources (specific clinincal training)	Provision	Input HumRes	Both	14 IPC/WASH	4	4	4	4	3	4	16		0				0		0		0					0	3	3	3	9	No	NOT SELECTED	NOT SELECTED	Prov		1.14 statement can be incorporated in quality statement 8.2.
1.14	1	10	MS-1		1. Proportion of health professionals in the health facility who have been trained in use of the WHO “5 moments for hand hygiene” audit tool. (89.57)	Inputs: Human resources	Human resources (specific clinincal training)	Provision	Input HumRes	Both	14 IPC/WASH	4	4	4	4	3	4	16		0				0		0		0					0	3	3	3	9	No	NOT SELECTED	NOT SELECTED	Prov		1.14 statement can be incorporated in quality statement 8.2.
1.14	1	11	MS-1		2. Evidence that the facility staff member or team responsible for infection prevention and control regularly collects data on episodes of hospital-acquired infection and has conducted at least one assessment of infection prevention and control practices in the past 6 months. (90.35)	Inputs: QI structures and supporting processes	Routine monitoring of the quality of care inpatient	Provision	Process	Inpatient	14 IPC/WASH	4	5	4	4	4	4	17						0		0		0					0	3	3	3	9	No	NOT SELECTED	NOT SELECTED	InR		1.14 statement can be incorporated in quality statement 8.2.
1.14	1	13	MS-2		4. Proportion of staff members in the health facility who meet biosafety standards when administering parenteral drugs. (82.16)	Processes: EB care, harmful practices, patient-centered practices	Compliance with EB care practices inpatient	Provision	Process	Inpatient	14 IPC/WASH	4	4	3	4	3	3	21		0	5	4	4	13		0		0					0	3	3	3	9	Yes	SELECTED	NOT SELECTED	Obs	Monthly	1.14 statement can be incorporated in quality statement 8.2.
1.14	1	12	MS-3		3. Proportion of all children who received IV infusions who had an episode of phlebitis. (81.00)		Routine monitoring of the quality of care inpatient	Provision	Outcome	Inpatient	14 IPC/WASH	4	4	3	5	4	3	16		0				0	4	4		0					0	3	3	3	9	Yes	SELECTED	NOT SELECTED	RIS		1.14 statement can be incorporated in quality statement 8.2.
1.14	1	14	MS-3		1. Proportion of children admitted to the health facility who had proven hospital-acquired infections. (87.57)	Outcomes: clinical condition-specific outcome	Clinical condition-specific outcome inpatient	Provision	Outcome	Inpatient	14 IPC/WASH	4	4	3	5	4	4	16		0				0	4	4		0					0	3	3	3	9	Yes	SELECTED	NOT SELECTED	RIS		1.14 statement can be incorporated in quality statement 8.2.
1.15	1	1	MS-1		1. The health facility has written, up-to-date guidance on unnecessary procedures, harmful practices and unnecessary interventions for children. (84.11)	Inputs: Operational Guidelines	Operational guidelines, protocols related to client-centered practices	Provision	Input ClinGuidelin	Both	15 Prev/unnes/harm	4	4	3	4			15	4	1.2				0		0		0					0	3	3	2	8	No	NOT SELECTED	NOT SELECTED	InR
1.15	1	2	MS-1		2. The health facility does not promote infant formula on the wards, and samples are not distributed to mothers or staff. (86.46)	Inputs: management and oversight	Oversight and management on patient-centered practices	Provision	Input Over&Man	Both	15 Prev/unnes/harm	4	5	4	4	4	4	17	5	2.5				0		0		0					0	3	3	3	9	No	NOT SELECTED	NOT SELECTED	InR
1.15	1	3	MS-1		3. The health facility does not display infant formula or bottles and teats, including on posters or placards. (86.82)	Inputs: management and oversight	Oversight and management on patient-centered practices	Provision	Input Over&Man	Both	15 Prev/unnes/harm	4	5	4	4	4	4	17	5	2.5				0		0		0					0	3	3	3	9	No	NOT SELECTED	NOT SELECTED	InR
1.15	1	4	MS-1		4. Health care staff in the facility receive in-service training and regular refresher sessions on harmful practices and unnecessary interventions at least once every 12 months. (83.56)	Inputs: Human resources	Human resources (specific clinincal training)	Provision	Input HumRes	Both	15 Prev/unnes/harm	4	4	4	4	3	4	16		0				0		0		0					0	3	3	3	9	No	NOT SELECTED	NOT SELECTED	Prov
1.15	1	5	MS-2		1. Proportion of young infants on formula when this is not indicated for the health of the mother or the infant. (78.96)	Processes: EB care, harmful practices, patient-centered practices	Compliance with EB care practices	Provision	Process	Both	15 Prev/unnes/harm	4	4	3	3	3	3	14		0	5	4	4	13		0		0					0	4	4	3	11	Yes	NOT SELECTED	NOT SELECTED	Obs	Monthly
1.15	1	6	MS-2		2. Proportion of children admitted to wards with no indication for hospital admission. (75.36)	Processes: EB care, harmful practices, patient-centered practices	Non-evidence-based, harmful practices inpatient	Provision	Process	Inpatient	15 Prev/unnes/harm	4	4	3	4	3	3	15		0	4	4	3	11		0		0					0	4	3	3	10	No	NOT SELECTED	NOT SELECTED	RIS	Monthly
1.15	1	7	MS-2		3. Proportion of children admitted to the health facility who receive IV fluids with no clear indication. (76.96)	Processes: EB care, harmful practices, patient-centered practices	Non-evidence-based, harmful practices inpatient	Provision	Process	Inpatient	15 Prev/unnes/harm	4	4	3	4	3	3	15		0	4	4	3	11		0		0					0	4	4	3	11	No	NOT SELECTED	NOT SELECTED	RIS	Monthly
1.15	1	8	MS-2		4. Proportion of children admitted to the health facility who receive blood when not indicated. (80.45)	Processes: EB care, harmful practices, patient-centered practices	Non-evidence-based, harmful practices inpatient	Provision	Process	Inpatient	15 Prev/unnes/harm	4	4	3	3	3	3	14		0	4	4	3	11		0		0					0	4	3	3	10	No	NOT SELECTED	NOT SELECTED	RIS	Monthly
1.15	1	9	MS-2		5. Proportion of children up to 5 years seen at the health facility with cough who receive harmful cough remedies for respiratory tract infections. (78.56)	Processes: EB care, harmful practices, patient-centered practices	Non-evidence-based, harmful practices inpatient	Provision	Process	Both	15 Prev/unnes/harm	4	4	4	4	4	4	16		0	4	5	4	13		0		0					0	4	4	3	11	Yes	SELECTED	NOT SELECTED	RIS	Monthly
1.15	1	10	MS-2		6. Proportion of children admitted to the health facility for whom there were proven medication errors or hospital-acquired infections. (81.92)	Processes: EB care, harmful practices, patient-centered practices	Non-evidence-based, harmful practices inpatient	Provision	Process	Inpatient	15 Prev/unnes/harm	4	4	3	3	4	4	22		0	4	3	5	12		0		0					0	4	4	3	11	No	NOT SELECTED	NOT SELECTED	RIS	Monthly	suggest to take out hospital ackquired infection and only measure errors. HAI is covered under standard 1.14
1.15	1	11	MS-2		7. Proportion of children seen at the health facility who received unnecessary oral or parenteral medicines. (81.27)	Processes: EB care, harmful practices, patient-centered practices	Non-evidence-based, harmful practices inpatient	Provision	Process	Both	15 Prev/unnes/harm	4	2	1	4	2	2	15		0	4	5	4	13		0		0					0	4	4	3	11	Yes	NOT SELECTED	NOT SELECTED	RIS	Monthly	this indicator is very broad. Need very clear definition to be measurable. Otherwise it is good.
1.15	1	12	MS-2		8. Proportion of children admitted to the health facility who received antibiotics when not indicated. (83.54)	Processes: EB care, harmful practices, patient-centered practices	Non-evidence-based, harmful practices inpatient	Provision	Process	Both	15 Prev/unnes/harm	4	5	3	4	3	3	16		0	4	4	5	13		0		0					0	4	4	3	11	Yes	SELECTED	NOT SELECTED	RIS	Monthly	I would suggest to revise this indicator both for inpatient and outpatient not only for inpatient; I suggest to define 2-3 major key conditions at outpatient and inpatient settings and assess antibiotic administration for these conditions only.
2.1	2	1	MS-4		1. The health facility has standardized, age-appropriate child care registers, clinical records, observation charts and patient cards in place at all times for recording and monitoring all care processes and outcomes. (93.71)	Input Heal&Sys	Standardized medical documentation and forms	Supporting systems	Input Heal&Sys	Both		4	5	3	4	3	4	16		0				0		0	5	5					0	3	3	4	10	Yes	SELECTED	NOT SELECTED	InR
2.1	2	2	MS-4		2. The health facility has an established storage system for medical records that ensures confidentiality and safety and allows rapid retrieval, access and distribution of patients’ medical records. (93.31)	Input Heal&Sys	Health Information system (medical documentation)	Supporting systems	Input Heal&Sys	Both		4	5	3	4	3	4	16		0				0		0	3	3					0	3	3	4	10	No	NOT SELECTED	NOT SELECTED	InR
2.1	2	3	MS-4		3. The health facility has a registration system for admissions, discharges, births and deaths that is linked to the national vital registration system at all times. (93.13)	Input Heal&Sys	Health Information system (medical documentation)	Supporting systems	Input Heal&Sys	Both		4	5	3	4	3	4	16		0				0		0	4	4					0	3	3	4	10	No	NOT SELECTED	NOT SELECTED	InR
2.1	2	4	MS-4		4. The health facility has a standardized system for classifying clinical conditions, diseases and health outcomes, including births and deaths, which is aligned with the ICD. (92.48)	Input Heal&Sys	Health Information system (medical documentation)	Supporting systems	Input Heal&Sys	Both		4	5	3	4	3	4	16		0				0		0	4	4					0	3	3	4	10	No	NOT SELECTED	NOT SELECTED	InR
2.1	2	5	MS-4		5. The health facility has a system for creating unique identifiers for new patients and locating pre-existing unique identifiers for returning patients. (90.59)	Input Heal&Sys	Health Information system (medical documentation)	Supporting systems	Input Heal&Sys	Both		4	5	4	4	3	4	17		0				0		0	4	4					0	3	3	4	10	No	NOT SELECTED	NOT SELECTED	InR
2.1	2	6	MS-4		6. The health facility staff receive training and refresher sessions at least once every 12 months on the use of standardized medical records, including birth and death registration, and classification of conditions and diseases in accordance with the ICD. (86.28)	Inputs: Human resources	Human resources: specific non-clinical training	Supporting systems	Input HumRes	Both		4	5	3	4	3	4	16		0				0		0	3	3					0	3	3	4	10	No	NOT SELECTED	NOT SELECTED	Prov
2.1	2	7	MS-4		7. The health facility has sufficient supplies of the necessary registers, patient medical forms, charts and patient cards (e.g. immunization cards) in stock at all times. (93.49)	Input Heal&Sys	Standardized medical documentation and forms	Supporting systems	Input Heal&Sys	Both		4	5	3	4	3	4	16		0				0		0	4	4					0	3	3	4	10	No	NOT SELECTED	NOT SELECTED	InR
2.1	2	8	MS-4		1. Proportion of all children currently in the health facility who have a patient identifier and individual clinical medical record. (89.32)	Input Heal&Sys	Quality documentation	Supporting systems	Input Heal&Sys	Both		4	5	3	4	3	4	16		0				0		0	4	4					0	3	3	4	10	No	NOT SELECTED	NOT SELECTED	RIS
2.1	2	9	MS-4		2. Proportion of medical records in which every entry is dated, timed (24-h clock), legible and signed by the person making the entry. (88.86)	Input Heal&Sys	Quality documentation	Supporting systems	Input Heal&Sys	Both		4	5	3	4	3	4	16		0				0		0	4	4					0	3	3	4	10	No	NOT SELECTED	NOT SELECTED	RIS
2.1	2	10	MS-4		3. Proportion of all children discharged from the health facility within the past 24 h who had an accurately completed discharge summary of the care provided, outcomes and diagnoses (with ICD codes). (90.23)	Input Heal&Sys	Quality documentation inpatient	Supporting systems	Input Heal&Sys	Inpatient		4	5	3	4	3	4	16		0				0		0	5	5					0	3	3	4	10	Yes	SELECTED	NOT SELECTED	RIS
2.1	2	11	MS-4		4. Proportion of all births and deaths occurring in the health facility that were appropriately registered in the national vital registration system. (91.36)	Input Heal&Sys	Death notification, review	Supporting systems	Input Heal&Sys	Both		4	5	3	4	3	4	16		0				0		0	5	5					0	5	4	4	13	Yes	SELECTED	CORE	RIS	Quarterly	This is very good indicator, however, very hard to measure.
2.1	2	12	MS-4		1. Proportion of all medical records that include legible documentation of relevant demographic and clinical information on the child and the process and outcomes of the care provided. (87.80)	Input Heal&Sys	Quality documentation	Supporting systems	Input Heal&Sys	Both		4	5	4	4	3	3	17		0				0		0	5	5					0	3	3	4	10	Yes	SELECTED	NOT SELECTED	RIS
2.1	2	13	MS-4		2. Proportion of all deaths that occurred in the health facility in the past 3 months that were appropriately recorded, with a correct, complete death notification and the cause of death consistent with the ICD classification. (92.13)	Input Heal&Sys	Quality documentation inpatient	Supporting systems	Input Heal&Sys	Inpatient		4	5	3	4	3	4	16		0				0		0	4	4					0	3	3	4	10	No	NOT SELECTED	NOT SELECTED	RIS
2.2	2	1	MS-4		1. The health facility has a system with standard operating procedures and protocols for data collection and for checking, validating and analysing relevant indicators to make timely reports and visual charts. (92.61)	Inputs: Operational Guidelines	Operational guidelines, protocols related to cross-cutting supporting systems (management, human resources, health information system, infrastructure, supplies and equipment, health financing, organization of health services)	Supporting systems	Input OperGuide	Both		4	3	4	4	4	4	15		0				0		0	3	3					0	3	3	3	9	No	NOT SELECTED	NOT SELECTED	InR
2.2	2	2	MS-4		2. Managers, health professionals and support staff in the health facility meet regularly (at least once a month) to review patient care and outcomes for decision-making and monitoring performance. (90.92)	Inputs: QI structures and supporting processes	Routine monitoring of the quality of care	Supporting systems	Input QI	Both		4	4	4	4	4	4	16		0				0		0	5	5					0	3	3	4	10	Yes	SELECTED	NOT SELECTED	InR		Statement 2.2. and Statement 7.3. have similar measures and can be optimyzed
2.2	2	3	MS-4		3. The health facility managers and community representatives meet regularly (at least every 3 months) to review the health facility statistics and performance and use the recommendations for decision-making. (87.42)	Inputs: QI structures and supporting processes	Routine monitoring of the quality of care	Supporting systems	Input QI	Both		4	4	3	4	4	4	15		0				0		0	5	5					0	3	3	4	10	Yes	NOT SELECTED	NOT SELECTED	InR
2.2	2	4	MS-4		4. The health facility regularly (at least once a month) reviews paediatric deaths and has mechanisms in place to implement the recommendations of the reviews. (93.46)	Input Heal&Sys	Death notification, review	Supporting systems	Input QI	Both		4	3	4	4	4	4	15		0				0		0	4	4					0	3	3	4	10	No	NOT SELECTED	NOT SELECTED	InR
2.2	2	5	MS-4		5. Evidence that the health facility analyses and produces monthly visual charts and reports for monitoring performance. (86.67)	Inputs: QI structures and supporting processes	Routine monitoring of the quality of care	Supporting systems	Input Heal&Sys	Both		4	4	4	4	4	4	16		0				0		0	5	5					0	3	3	4	10	Yes	SELECTED	NOT SELECTED	InR
2.2	2	6	MS-4		1. Number of meetings between health facility management and community representatives in the past 6 months. (82.72)	Inputs: QI structures and supporting processes	Structures, regular meetings and implementation plan for QI	Supporting systems	Input Over&Man	Both		4	4	4	4	3	4	16		0				0		0	4	4					0	3	3	4	10	No	NOT SELECTED	NOT SELECTED	InR
2.2	2	7	MS-4		2. Proportion of all paediatric deaths that occurred in the health facility in the past 3 months that were reviewed with standard death audit tools. (91.42)	Input Heal&Sys	Death notification, review	Supporting systems	Input QI	Both		4	4	4	4	4	3	16		0				0		0	5	5					0	4	4	5	13	Yes	SELECTED	CORE	InR	Quarterly	1.1. #16 is similar to 2.2. #7 indicator, it is more natural to leave it in standard 2.2; suggest to add pieace on action: death reviewed and action steps with responcible parties defined
2.2	2	8	MS-4		1. Proportion of all recommendations from paediatric death reviews conducted at the health facility in the past 6 months that were fully implemented. (86.95)	Inputs: QI structures and supporting processes	Adressing gaps in QoC	Supporting systems	Input QI	Both		5	5	3	4	4	3	17		0				0		0	5	5					0	3	3	4	10	Yes	SELECTED	NOT SELECTED	InR
	2	9	MS-4		2. Proportion of monthly reports from the health facility received by the next highest level of administration in the past 6 months. (84.01)	Input Heal&Sys	Reporting	Supporting systems	Input Heal&Sys	Both		3	4	3	4	3	3	14		0				0		0	5	5					0	3	3	4	10	Yes	NOT SELECTED	NOT SELECTED	InR
2.3	2	1	MS-4		1. The health facility has a functioning, age-appropriate system and procedures in place for collecting information and responding to the perceptions of children and their carers of the services provided. (87.97)	Inputs: Operational Guidelines	Operational guidelines, protocols related to client-centered practices	Supporting systems	Input OperGuide	Both		4	4	3	5	4	4	16		0				0		0	4	4					0	3	3	4	10	No	NOT SELECTED	NOT SELECTED	InR
2.3	2	2	MS-4		2. The health facility has visual materials to inform children and their carers on how to make a complaint (e.g. a suggestion box) and provide feedback to the health facility. (89.40)	Inputs: Infrastructure, equipment client-centered	Infrastructure for client-centered practices	Supporting systems	Input InfrastMedSupEquip	Both		4	4	3	5	4	4	16		0				0		0	4	4					0	3	3	4	10	No	NOT SELECTED	NOT SELECTED	InR
2.3	2	3	MS-4		3. Health facility staff (clinical and nonclinical) receive training or orientation in customer service and provision of child- and family-centred care at least once every 12 months. (86.29)	Inputs: Human resources	Human resources: specific non-clinical training	Supporting systems	Input HumRes	Both		4	4	3	5	4	4	16		0				0		0	4	4					0	3	3	4	10	No	NOT SELECTED	NOT SELECTED	Prov
2.3	2	4	MS-4		1. Proportion of carers of children who are aware of the mechanism for patient complaints and feedback (e.g. suggestion box) in the health facility. (81.05)	Inputs: financing	Providers' awareness on the existing mechanisms for patient feedback	Supporting systems	Input Financing	Both		4	4	3	5	4	4	16		0				0		0	5	5					0	3	3	4	10	Yes	SELECTED	NOT SELECTED	Client
2.3	2	5	MS-4		2. Proportion of children and/or their carers who participated in patient satisfaction surveys or provided feedback on the services received in the past 3 months. (82.28)	Inputs: management and oversight	Oversight and management on patient-centered practices	Supporting systems	Input Over&Man	Both		4	4	3	5	4	4	16		0				0		0	5	5					0	3	3	4	10	Yes	SELECTED	NOT SELECTED	Client
2.3	2	6	MS-4		1. Proportion of children and/or their carers who are satisfied with the time they spent waiting for care, the procedures and other processes in the health facility. (84.23)	Outcomes: client/career satisfaction	Satisfaction (client/career)	Supporting systems	Outcome	Both		4	4	3	2	4	4	13		0				0		0	4	4					0	3	3	4	10	No	NOT SELECTED	NOT SELECTED	Client
2.3	2	7	MS-4		2. Proportion of all complaints from children and/or their carers received by the health facility in the past 6 months that were reviewed and acted upon. (85.38)	Inputs: management and oversight	Oversight and management on patient-centered practices	Supporting systems	Input Over&Man	Both		4	4	3	5	4	4	16		0				0		0	5	5					0	3	3	4	10	Yes	SELECTED	NOT SELECTED	InR
3.1	3	1			1. The health facility has written, up-to-date clinical protocols and guidelines for prereferral management of all infants, children who require referral. (94.13)	Inputs: Operational Guidelines	Operational guidelines, protocols related to care provision	Supporting systems	Input ClinGuidelin	Both								0		0				0		0		0					0				0	No	NOT SELECTED	NOT SELECTED	InR
3.1	3	2	MS-5		2. The health facility is equipped with age-appropriate medicines and other supplies for stabilization and prereferral treatment of critically ill children who require referral. (94.09)	Inputs: infrastructure, equipment, supplies clinical condition-specific	Clinical condition-specific medicines, supplies and equipment	Supporting systems	Input InfrastMedSupEquip	Both		4	3	3	4	3	3	14		0				0		0	4	4					0	3	3	4	10	No	NOT SELECTED	NOT SELECTED	InR
3.1	3	3	MS-5		3. The health facility has at least one health professional on duty at all times who is trained and competent in first aid, emergency triage, assessment and treatment or basic paediatric life support. (92.90)	Inputs: Human resources	Human resources (specific clinincal training)	Supporting systems	Inputs: Human resources	Both	1 ASB/ETAT/Asses/class/full	4	5	3	5	3	3	17		0				0		0	5	5					0	3	3	4	10	Yes	SELECTED	NOT SELECTED	InR		relevant to Standard 1.1. duplicate to Indicator #12
3.1	3	4	MS-5		4. The professional staff communicate clearly with family members about the condition of their child and about why and where the child will be referred for further care. (82.19)		Organization of care processes (including information exchange, care coordination and referral)	Supporting systems	Process	Both		4	5	2	4	4	4	15		0				0		0	5	5					0	3	3	4	10	Yes	NOT SELECTED	NOT SELECTED	Client
3.1	3	5	MS-5		1. Proportion of all children who require referral who are given prereferral treatment and transferred within 2 h of arrival at the referring health facility. (88.13)		Organization of care processes (including information exchange, care coordination and referral)	Supporting systems	Process	Both	1 ASB/ETAT/Asses/class/full	4	3	3	4	3	3	14		0				0		0	4	4					0	3	3	4	10	No	NOT SELECTED	NOT SELECTED	RIS		Some measures of 3.1. statement are similar to measures of Quality statement 1.1.
3.1	3	6	MS-5		2. Proportion of all children with surgical emergencies that require referral to a facility with surgical capacity who were transferred within 2 h of arrival at the referring health facility. (86.12)		Organization of care processes (including information exchange, care coordination and referral)	Supporting systems	Process	Both	12 Surg/injur	4	3	3	4	3	3	14		0				0		0	4	4					0	3	3	4	10	No	NOT SELECTED	NOT SELECTED	RIS
3.1	3	7	MS-5		3. Proportion of all children who require referral who received appropriate prereferral treatment when indicated. (89.40)	Processes: EB care, harmful practices, patient-centered practices	Compliance with EB care practices outpatient	Supporting systems	Process	Outpatient	1 ASB/ETAT/Asses/class/full	4	5	3	5	3	3	17		0	5	3	5	13		0	5	5					0	3	3	4	10	Yes	SELECTED	NOT SELECTED	RIS
3.1	3	8	MS-5		1. Proportion of children seen in the health facility within the past 3 months who fulfilled the facility’s criteria for referral and who were actually transferred to a referral facility. (83.43)	Outcomes: referral	Outcome of the referral (Died before/during referral, reached referral facility, refused referral)	Supporting systems	Process	Both		4	3	3	4	3	3	14		0				0	4	4	4	4					0	3	3	4	10	Yes	NOT SELECTED	NOT SELECTED	RIS
3.1	3	9	MS-5		2. Proportion of all children with an indication that requires referral who died at the health facility. (88.30)	Outcomes: referral	Outcome of the referral (Died before/during referral, reached referral facility, refused referral)	Supporting systems	Outcome	Both		4	5	3	5	3	3	17		0				0		0	5	5					0	3	3	4	10	Yes	SELECTED	NOT SELECTED	RIS		Indicator #9 and #10 are similar. Suggesting #9 as it is difficult to determine the cause of death without further investigation
3.1	3	10	MS-5		3. Number of children who died as a result of delayed referral. (83.81)	Outcomes: referral	Outcome of the referral (Died before/during referral, reached referral facility, refused referral)	Supporting systems	Outcome	Both		4	5	3	4	3	3	16		0				0		0	4	4					0	3	3	4	10	No	NOT SELECTED	NOT SELECTED	RIS
3.2	3	1	MS-5		1. The health facility is part of a referral network of facilities in the same geographical area with agreed arrangements. (92.92)	Inputs: management and oversight	Oversight and management on cross-cutting supporting systems	Supporting systems	Input Over&Man	Both		4	4	4	4	3	4	16		0				0		0	3	3					0	3	3	3	9	No	NOT SELECTED	NOT SELECTED	InR
3.2	3	2	MS-5		2. The health facility has local financial arrangements to ensure that children who cannot be managed at the health facility are referred and transferred with their parent or caregiver without delay, 24 h a day, 7 days a week. (86.82)	Inputs: financing	Financing of cross-cutting supporting systems (energy, fuel for vehicles)	Supporting systems	Input Financing	Both		4	4	4	4	3	4	16		0				0		0	4	4					0	3	3	3	9	No	NOT SELECTED	NOT SELECTED	InR
3.2	3	3	MS-5		3. The health facility has a functioning vehicle with fuel or proximate access to a vehicle that is routinely available for emergency transport to referral facilities. (92.78)	Inputs: Infrastructure, equipment, supplies cross-cutting	Transport	Supporting systems	Input InfrastMedSupEquip	Both		4	4	3	4	3	4	15		0				0		0	4	4					0	3	3	3	9	No	NOT SELECTED	NOT SELECTED	InR
3.2	3	4	MS-5		4. The health facility vehicle is regularly maintained, clean and carries basic consumables, medications and equipment suitable for resuscitation and supportive care of children of all ages. (88.68)	Inputs: Infrastructure, equipment, supplies cross-cutting	Transport	Supporting systems	Input InfrastMedSupEquip	Both		4	4	3	4	3	4	15		0				0		0	4	4					0	3	3	3	9	No	NOT SELECTED	NOT SELECTED	InR
3.2	3	5	MS-5		1. Proportion of children who were referred without appropriate emergency transport. (81.24)	Inputs: Infrastructure, equipment, supplies cross-cutting	Transport	Supporting systems	Input InfrastMedSupEquip	Both		4	4	3	5	4	4	16		0				0		0	5	5					0	3	3	3	9	Yes	SELECTED	NOT SELECTED	Client
3.2	3	6	MS-5		2. Proportion of children referred from the health facility whose families or carers contributed financially to their referral transport. (74.52)	Inputs: financing	Financing of cross-cutting supporting systems (energy, fuel for vehicles)	Supporting systems	Input Financing	Both		4	4	3	4	4	4	15		0				0		0	4	4					0	3	3	3	9	No	NOT SELECTED	NOT SELECTED	Client
3.2	3	7	MS-5		3. Proportion of all severely ill children who required referral who were transferred to a receiving facility accompanied by a health care professional. (74.12)	Inputs: Organization and availability of health services	Organization of care processes (including information exchange, care coordination and referral)	Supporting systems	Process	Outpatient		4	4	3	4	3	4	15		0				0		0	4	4					0	3	3	3	9	No	NOT SELECTED	NOT SELECTED	InR
3.2	3	8	MS-5		4. Proportion of children referred to a referral health facility or their carers who reported receiving immediate attention (within 15 min) on arrival at the referral health facility. (80.07)	Inputs: Organization and availability of health services	Organization of care processes inpatient (including information exchange, care coordination and referral)	Supporting systems	Process	Inpatient		4	4	3	5	3	4	16		0				0		0	5	5					0	3	3	3	9	Yes	SELECTED	NOT SELECTED	Client
3.2	3	9	MS-5		1. Proportion of children who died before or during transfer to a higher-level facility for further management. (89.68)	Outcomes: referral	Outcome of the referral (Died before/during referral, reached referral facility, refused referral)	Supporting systems	Outcome	Both		4	4	3	5	3	4	16		0				0		0	4	4					0	3	3	3	9	No	NOT SELECTED	NOT SELECTED	RIS		This indicator is similar to quality statement 3.1. indicator #9 and #10. suggest to optimyze accordingly
3.2	3	10	MS-5		2. Proportion of newborns referred from the facility who reached the referral facility. (87.06)	Outcomes: referral	Outcome of the referral (Died before/during referral, reached referral facility, refused referral)	Supporting systems	Outcome	Both		4	4	3	5	3	4	16		0				0		0	5	5					0	3	3	3	9	Yes	SELECTED	NOT SELECTED	InR		maybe we could add timinng: within 2 hours (if feasible)
3.2	3	11	MS-5		3. Proportion of all children referred from the health facility who completed their referral. (86.23)	Outcomes: referral	Outcome of the referral (Died before/during referral, reached referral facility, refused referral)	Supporting systems	Outcome	Both		4	4	3	5	3	4	16		0				0		0	4	4					0	3	3	3	9	No	NOT SELECTED	NOT SELECTED	InR
3.2	3	12	MS-5		4. Proportion of all children referred from the health facility whose families refused referral (80.77)	Outcomes: referral	Outcome of the referral (Died before/during referral, reached referral facility, refused referral)	Supporting systems	Outcome	Both		4	4	3	5	3	4	16		0				0		0	4	4					0	3	3	3	9	No	NOT SELECTED	NOT SELECTED	Client
3.3	3	1	MS-5		1. The health facility has a standardized referral form to document relevant demographic and clinical information (summary of history, clinical findings, investigations, diagnosis and treatment given) and the reason for referral. (94.99)	Input Heal&Sys	Health Information system (referral note, communication)	Supporting systems	Input Heal&Sys	Both		4	3	4	3	4	4	14		0				0		0	4	4					0	3	3	3	9	No	NOT SELECTED	NOT SELECTED	InR
3.3	3	2	MS-5		2. The health facility has reliable methods of communication (mobile phone, landline or radio) that are functioning at all times for facilitating referrals. (93.13)	Inputs: Infrastructure, equipment, supplies cross-cutting	Supplies and equipment cross-cutting (essential medicines)	Supporting systems	Inputs: Infrastructure, equipment, supplies cross-cutting	Both		4	3	4	3	4	4	14		0				0		0	4	4					0	3	3	3	9	No	NOT SELECTED	NOT SELECTED	InR
3.3	3	3	MS-5		3. The health facility has formal agreements, communication arrangements and a feedback system with the network referral facilities. (88.25)	Inputs: Organization and availability of health services	Organization of care processes (including information exchange, care coordination and referral)	Supporting systems		Both		4	3	4	3	4	4	14		0				0		0	4	4					0	3	3	3	9	No	NOT SELECTED	NOT SELECTED	InR
3.3	3	4	MS-5		1. Proportion of all children referred by a health facility for whom written counter-referral feedback information was provided by the receiving facility. (84.60)	Input Heal&Sys	Health Information system (referral note, communication)	Supporting systems	Input Heal&Sys	Both		4	4	3	5	4	4	16		0				0		0	5	5					0	3	3	3	9	Yes	SELECTED	NOT SELECTED	RIS
3.3	3	5	MS-5		2. Proportion of all children referred for whom there were documented prereferral communications (verbal, written) with the receiving facility. (85.63)	Input Heal&Sys	Health Information system (referral note, communication)	Supporting systems	Input Heal&Sys	Both		4	5	3	4	3	4	16		0				0		0	5	5					0	3	3	3	9	Yes	SELECTED	NOT SELECTED	RIS
3.3	3	6	MS-5		1. Proportion of all children referred who had an appropriate referral note. (89.04)	Input Heal&Sys	Health Information system (referral note, communication)	Supporting systems	Input Heal&Sys	Both		4	5	3	4	4	3	16		0				0		0	5	5					0	3	3	3	9	Yes	SELECTED	NOT SELECTED	RIS		define appropriateness based on presence/absence of following: demographic and clinical information (summary of history, clinical findings, investigations, diagnosis and treatment given) and the reason for referral.
4.1	4	1	MS-8		1. The health facility has an up-to-date, written policy and provisions to ensure that all staff are identifiable, with name badges, and that they always introduce themselves to children and their carers, state their name and role and use the name of the child or carer when communicating with them. (90.31)	Inputs: Operational Guidelines	Operational guidelines, protocols related to client-centered practices	Experience	Input OperGuide	Both		3	4	4	3	4	4	22		0				0		0		0	0	0	0	5	1	3	3	3	9	No	NOT SELECTED	NOT SELECTED	InR
4.1	4	2	MS-8		2. Health facility policy provides that children and their families are entitled to receive appropriate information about the child’s care and other relevant aspects during their stay in the facility. (92.67)	Inputs: Operational Guidelines	Operational guidelines, protocols related to client-centered practices	Experience	Input OperGuide	Both		4	4	4	3	4	4	15		0				0		0		0	5	0	0	5	2.5	3	3	3	9	Yes	NOT SELECTED	NOT SELECTED	InR
4.1	4	3	MS-8		3. The health facility provides information materials to children and their families to help them understand the opportunities for engagement, how to participate in their care and the roles of the different members of the health care team. (87.00)	Input Heal&Sys	Health Information system (informed consent, information materials)	Experience	Input Heal&Sys	Both		4	4	4	3	4	3	15		0				0		0		0	5	0	0	5	2.5	3	3	3	9	Yes	NOT SELECTED	NOT SELECTED	InR
4.1	4	4	MS-8		4. The health facility makes available child-friendly, age-appropriate health information materials that are accessible, in the language(s) relevant to the population and in appropriate formats (e.g audiovisuall or visual material, diagrams, illustrations) to facilitate understanding by children and carers. (88.65)	Input Heal&Sys	Health Information system (informed consent, information materials)	Experience	Input Heal&Sys	Both		4	4	4	3	4	3	15		0				0		0		0	5	0	0	5	2.5	3	3	3	9	Yes	NOT SELECTED	NOT SELECTED	InR
4.1	4	5	MS-8		5. The health facility has a system for providing information to patients about their medical conditions and their treatment care plan in a way that is understandable to them and allays their doubts and fears. (85.28)	Inputs: Organization and availability of health services	Organization of processes (including communication with patient/careers, ensuring privacy, education, counselling sessions)	Experience	Input OperGuide	Both		4	4	4	3	4	4	15		0				0		0		0	5	0	0	5	2.5	3	3	3	9	Yes	NOT SELECTED	NOT SELECTED	InR
4.1	4	6	MS-8		6. Health care staff receive training and regular mentoring or refresher training at least every 12 months in fully explaining a condition to children and their carers, giving “bad news” and supporting children and parents in coping with the information given. (91.75)	Inputs: Human resources	Human resources: specific non-clinical training	Experience	Input HumRes	Both		4	4	4	3	4	4	15		0				0		0		0	5	0	0	5	2.5	3	3	3	9	Yes	NOT SELECTED	NOT SELECTED	Prov
4.1	4	7	MS-8		1. Proportion of health care staff in the health facility wearing identification badges. (84.94)	Inputs: Organization and availability of health services	Organization of processes (including communication with patient/careers, ensuring privacy, education, counselling sessions)	Experience	Input Over&Man	Both		3	4	4	3	4	4	14		0				0		0		0	5	0	0	5	2.5	3	3	3	9	Yes	NOT SELECTED	NOT SELECTED	Obs
4.1	4	8	MS-8		2. Proportion of health care staff, by cadre and social professionals who received proper continuous training in communication and counselling. (86.84)	Inputs: Human resources	Human resources: specific non-clinical training	Experience	Input HumRes	Both		4	4	4	3	4	4	15		0				0		0		0	5	0	0	5	2.5	3	3	3	9	Yes	NOT SELECTED	NOT SELECTED	Prov
4.1	4	9	MS-8		3. Proportion of health care staff in the health facility who demonstrate good communication skills: asking and listening to children and carers, enabling them to ask questions, explaining with examples to ensure understanding and verifying their understanding. (85.16)	Inputs: Organization and availability of health services	Organization of processes (including communication with patient/careers, ensuring privacy, education, counselling sessions)	Experience	Process	Both		4	4	4	4	4	4	16		0				0		0		0	5	0	0	0	1.5	3	3	3	9	No	NOT SELECTED	NOT SELECTED	Obs
4.1	4	10	MS-8		4. Proportion of children and their carers who consider that they were given the information they required in a timely, respectful manner. (85.55)	Outcomes: client/career satisfaction	Satisfaction (client/career)	Experience	Outcome	Both		4	4	3	4	4	4	15		0				0		0		0	5	5	0	0	2.5	3	3	3	9	Yes	NOT SELECTED	NOT SELECTED	Client
4.1	4	11	MS-8		1. Proportion of children and/or carers seen in the outpatient department of the health facility who can correctly state the reason that a particular treatment was given, when to return and how to take the treatment at home. (92.04)	Outcomes: client-centered practices	Knowledge of care provider's name, condition or treatment given outpatient	Experience	Outcome	Outpatient		4	4	3	5	4	4	16		0				0		0		0	5	5	0	5	3.5	5	5	3	13	Yes	SELECTED	CORE	Client	Quarterly
4.1	4	12	MS-8		2. Proportion of children discharged from the health facility or their carers who were given written instructions about treatment and care at home and can describe correctly how to take or give the discharge treatment at home. (94.02)	Outcomes: client-centered practices	Written/verbal instructions to discharged patients, transfer forms given, consent forms signed inpatient	Experience	Process	Inpatient		4	4	3	5	4	4	16		0				0		0		0	5	5	0	5	3.5	5	5	3	13	Yes	SELECTED	CORE	Client	Quarterly
4.1	4	13	MS-8		3. Proportion of children and/or their carers who reported that they were satisfied with the quality of the health information and support they received from health care staff during their care. (87.79)	Outcomes: client/career satisfaction	Satisfaction (client/career)	Experience	Outcome	Both		4	4	3	5	4	4	16		0				0		0		0	5	5	0	5	3.5	3	3	3	9	Yes	SELECTED	NOT SELECTED	Client
4.2	4	1	MS-8		1. The health facility has a written, up-to-date, structured, standard form to facilitate written hand-over of patients among caring teams at shift changes or during transfer among facilities. (94.89)		Operational guidelines, protocols related to care provision inpatient	Experience	Input Heal&Sys	Inpatient		4	4	3	4	4	3	15		0				0		0		0	5	0	0	0	1.5	3	3	3	9	No	NOT SELECTED	NOT SELECTED	InR
4.2	4	2	MS-8		2. The health facility has a functioning communication system for exchanging information among relevant service providers that reaches all critical staff 24 h a day, 7 days a week. (93.20)	Input Heal&Sys	Health Information system (referral note, communication) inpatient	Experience	Input Heal&Sys	Inpatient		4	4	3	4	4	3	15		0				0		0		0	5	0	0	0	1.5	3	3	3	9	No	NOT SELECTED	NOT SELECTED	Prov
4.2	4	3	MS-8		3. Staff who care for children receive orientation or refresher sessions in clinical hand-over policy and communication at least once every 12 months. (93.73)	Inputs: Human resources	Human resources: specific non-clinical training	Experience	Input HumRes	Both		4	4	3	4	4	3	15		0				0		0		0	5	0	0	0	1.5	3	3	3	9	No	NOT SELECTED	NOT SELECTED	InR
4.2	4	4	MS-8		1. Proportion of clinical records that demonstrate that all correspondence about investigations and clinical interventions received were reviewed by health care staff, signed and acted upon in a timely manner. (89.00)	Input Heal&Sys	Health Information system (referral note, communication) inpatient	Experience	Input Heal&Sys	Inpatient		4	4	3	4	4	3	15		0				0		0		0	5	0	0	0	1.5	3	3	3	9	No	NOT SELECTED	NOT SELECTED	RIS
4.2	4	5	MS-8		2. Proportion of children admitted to the health facility for whom there is an up-to-date, appropriately completed monitoring chart that indicates that vital signs were monitored regularly. (97.97)	Input Heal&Sys	Quality documentation inpatient	Experience	Input Heal&Sys	Inpatient	13 Support/Sick	4	4	3	5	4	3	16		0				0		0		0	0	0	5	5	2.5	3	3	3	9	Yes	SELECTED	NOT SELECTED	RIS		This indicator is also relevant to standard 1.13 routine monitoring of the sick children in hospital
4.2	4	6	MS-8		3. Proportion of all children admitted to the health facility or their carers who know their primary health care provider by name. (80.33)	Outcomes: client/career knowledge	Knowledge of care provider's name, condition or treatment given inpatient	Experience	Outcome	Both		4	4	3	4	4	3	15		0				0		0		0	0	5	0	5	2	3	3	3	9	No	NOT SELECTED	NOT SELECTED	Client
4.2	4	7	MS-8		1. Proportion of children or their carers who express satisfaction with the information shared and the continuity of care received from different health care providers. (92.19)	Outcomes: client/career satisfaction	Satisfaction (client/career) inpatient	Experience	Outcome	Both		4	4	3	4	4	4	23		0				0		0		0	5	5	0	0	2.5	3	3	3	9	Yes	SELECTED	NOT SELECTED	Client
4.2	4	8	MS-8		2. Proportion of health care staff, by cadre, who are satisfied that the information in daily patient notes ensures understanding of current diagnoses, the treatment plan and planned or pending investigations. (86.84)	Inputs: Human resources	Satisfaction (staff/providers) inpatient	Experience	Input HumRes	Inpatient		4	4	3	5	3	4	23		0				0		0		0	0	0	5	5	2.5	3	3	3	9	Yes	SELECTED	NOT SELECTED	Prov
4.2	4	9	MS-8		3. Proportion of paediatric transfers within the facility for which there is a complete transfer form with clinical notes, including timely reception of diagnostic test results for transferred patients. (91.40)	Input Heal&Sys	Health Information system (informed consent, information materials) inpatient	Experience	Input Heal&Sys	Inpatient		4	4	3	5	3	4	23		0				0		0		0	0	0	5	5	2.5	3	3	3	9	Yes	SELECTED	NOT SELECTED	RIS
4.3	4	1	MS-8		1. The health facility has up-to-date protocols, guidelines and job aides for providing information to children and their carers about the purpose, importance, benefits, risks and possible costs of proposed investigations, referrals or treatments. (88.32)	Inputs: Operational Guidelines	Operational guidelines, protocols related to client-centered practices	Experience	Input OperGuide	Both		4	4	4	3	4	4	15		0				0		0		0	5	0	0	0	1.5	3	3	3	9	No	NOT SELECTED	NOT SELECTED	InR
4.3	4	2	MS-8		2. The health facility has an up-to-date “clients’ charter” that states the policies for child- and family-centred care, guidance on confidentiality and the practice and culture of family presence during clinical examinations, procedures and treatment of children. (91.37)	Inputs: Operational Guidelines	Operational guidelines, protocols related to client-centered practices	Experience	Input OperGuide	Both		4	4	4	3	4	4	15		0				0		0		0	0	0	0	5	1	3	3	3	9	No	NOT SELECTED	NOT SELECTED	InR
4.3	4	3	MS-8		3. The health facility has appropriate forms for patients, parents or carers to sign in order to give their consent to procedures, investigations and treatment. When consent is given orally, this is registered on the patient’s chart. (92.16)	Input Heal&Sys	Health Information system (informed consent, information materials)	Experience	Input Heal&Sys	Both		4	4	4	3	4	4	15		0				0		0		0	5	0	0	5	2.5	3	3	3	9	Yes	NOT SELECTED	NOT SELECTED	InR
4.3	4	4	MS-8		4. The health facility has various visual resources (e.g. models, charts, posters, videos, electronic material) in the consulting room for use by clinical staff and other health professionals to provide explanations to children and their carers. (88.22)	Input Heal&Sys	Health Information system (informed consent, information materials)	Experience	Input Heal&Sys	Both		4	4	4	3	4	4	15		0				0		0		0	5	0	0	5	2.5	3	3	3	9	Yes	NOT SELECTED	NOT SELECTED	InR
4.3	4	5	MS-8		5. Staff who care for children receive orientation or training in patient-centred care and legal and medical ethical principles of autonomy, informed consent, confidentiality and privacy at least once every 12 months. (88.70)	Inputs: Human resources	Human resources: specific non-clinical training	Experience	Input HumRes	Both		4	4	4	3	4	4	15		0				0		0		0	0	0	5	5	2.5	3	3	3	9	Yes	NOT SELECTED	NOT SELECTED	Prov
4.3	4	6	MS-8		1. Proportion of children or their carers who were informed about their right to express their views and participate in making decisions about their care. (87.20)	Inputs: Organization and availability of health services	Organization of processes (including communication with patient/careers, ensuring privacy, education, counselling sessions)	Experience	Process	Both		4	4	4	3	4	4	15		0				0		0		0	0	5	0	5	2	3	3	3	9	No	NOT SELECTED	NOT SELECTED	Client
4.3	4	7	MS-8		2. Proportion of parents or carers in the health facility who were offered the option and were present with their child during medical procedures. (88.63)	Inputs: Organization and availability of health services	Written/verbal instructions to discharged patients, transfer forms given, consent forms signed	Experience	Process	Inpatient		4	4	4	3	4	4	15		0				0		0		0	0	5	0	5	2	3	3	3	9	No	NOT SELECTED	NOT SELECTED	RIS		This indicator can be combined together with Ind #10
4.3	4	8	MS-8		1. Proportion of children and/or their carers who considered that their views had been taken into consideration or sought in making decisions about their care. (83.21)		Written/verbal instructions to discharged patients, transfer forms given, consent forms signed	Experience	Outcome	Both		4	4	4	4	4	4	16		0				0		0		0	5	5	0	5	3.5	4	3	3	10	Yes	SELECTED	NOT SELECTED	Client
4.3	4	9	MS-8		2. Proportion of children of legal age in the health facility who gave documented informed consent for procedures or treatment provided. (88.30)	Outcomes: client/career satisfaction	Satisfaction (client/career)	Experience	Outcome	Inpatient		4	3	4	5	3	3	16		0				0		0		0	5	5	0	5	3.5	4	3	3	10	Yes	SELECTED	NOT SELECTED	Client
4.3	4	10	MS-8		3. Proportion of parents or caregivers who gave their informed, documented consent for procedures and treatment of their children. (91.15)	Inputs: Organization and availability of health services	Written/verbal instructions to discharged patients, transfer forms given, consent forms signed	Experience	Outcome	Both		4	4	4	4	4	4	16		0				0		0		0	5	5	0	5	3.5	4	3	3	10	Yes	SELECTED	NOT SELECTED	RIS		This indicator can be combined together with Ind #7
4.4	4	1	MS-8		1. The health facility has information materials for distribution to children and carers about common conditions, promoting and supporting appropriate feeding and nutrition and promoting disease prevention, including hygiene and sanitation practices. (90.54)	Input Heal&Sys	Health Information system (informed consent, information materials)	Experience	Input Heal&Sys	Both		4	3	4	4	3	3	15		0				0		0		0	5	0	0	0	1.5	4	3	3	10	No	NOT SELECTED	NOT SELECTED
4.4	4	2	MS-8		2. The health facility provides a booklet for the health record of each child at birth or at the first visit to the health facility, which is kept by a parent or carer and used by health providers to document relevant information. (95.29)	Input Heal&Sys	Health Information system (informed consent, information materials)	Experience	Input Heal&Sys	Both		4	3	4	4	3	4	15		0				0		0		0	5	0	0	0	1.5	4	3	3	10	No	NOT SELECTED	NOT SELECTED	Client
4.4	4	3	MS-8		3. The health facility holds regular “well-being clinics” (e.g. well-child and immunization clinics, counselling services, growth and development monitoring clinics, adolescent clinics), which are used as opportunities for health promotion and preventive care. (94.18)	Inputs: Organization and availability of health services	Organization of processes (including communication with patient/careers, ensuring privacy, education, counselling sessions)	Experience	Input OrgCare	Both		4	3	4	4	3	4	15		0				0		0		0					0	4	3	3	10	No	NOT SELECTED	NOT SELECTED	InR
4.4	4	4	MS-8		4. The health facility has a system for detecting whether a child has missed a vaccination and offers “catch-up” vaccination within the national immunization programme, according to WHO guidelines. (91.26)	Inputs: Organization and availability of health services	Organization of care processes outpatient (including information exchange, care coordination and referral)	Experience	Input OrgCare	Outpatient		4	3	4	4	3	4	15		0				0		0		0					0	4	3	3	10	No	NOT SELECTED	NOT SELECTED	RIS
4.4	4	5	MS-8		5. The health facility has an effective system for implementing community-based activities to promote children’s health and well-being. (85.86)	Inputs: management and oversight	Oversight and management on cross-cutting supporting systems outpatient	Experience	Input Over&Man	Outpatient		4	3	4	4	3	3	15		0				0		0		0					0	4	3	3	10	No	NOT SELECTED	NOT SELECTED	InR
4.4	4	6	MS-8		1. Proportion of children or their parents or carers who attended at least one health education or promotion session at the health facility. (82.46)	Inputs: Organization and availability of health services	Organization of processes outpatient (including communication with patient/careers, ensuring privacy, education, counselling sessions)	Experience	Process	Outpatient		4	3	4	4	4	4	15		0				0		0		0					0	4	3	3	10	No	NOT SELECTED	NOT SELECTED	InR
4.4	4	7	MS-8		2. Proportion of children under 2 years of age whose parents or carers were counselled and received information about breastfeeding, complementary foods and feeding practices during the current illness. (91.48)	Inputs: Organization and availability of health services	Organization of processes (including communication with patient/careers, ensuring privacy, education, counselling sessions)	Experience	Process	Both		4	4	3	4	3	4	15		0				0		0		0	5	5	0	0	2.5	4	3	3	10	Yes	NOT SELECTED	NOT SELECTED	Client
4.4	4	8	MS-8		3. Proportion of children with chronic diseases for whom regular follow-up is routinely scheduled and documented in the health facility records. (90.29)	Inputs: Organization and availability of health services	Organization of processes outpatient (including communication with patient/careers, ensuring privacy, education, counselling sessions)	Experience	Process	Both	6 RCEB/Nutr/Growth	3	5	4	4	3	4	16		0				0		0		0	5	0	0	5	2.5	4	3	3	10	Yes	SELECTED	NOT SELECTED	Client
4.4	4	9	MS-8		4. Proportion of adolescents seen individually by a health professional without the presence of a parent. (80.13)	Inputs: Organization and availability of health services	Organization of processes (including communication with patient/careers, ensuring privacy, education, counselling sessions)	Experience	Process	Outpatient	10 ASB/Chronic/Con	4	4	3	4	4	4	15		0				0		0		0	0	0	0	5	1	4	3	3	10	No	NOT SELECTED	NOT SELECTED	Client
4.4	4	10	MS-8		1. Proportion of all children whose vaccination card or history indicates that their vaccination is not complete who leave the health facility with all the necessary vaccinations. (92.64)	Impact/No disease-specific care outcomes	Impact outpatient ( e.g full vaccination)	Experience	Outcome	Both		4	4	3	4	4	3	15		0				0		0		0	5	5	0	0	2.5	5	5	3	13	Yes	NOT SELECTED	NOT SELECTED	Client	Monthly	let's see if there is any other way to monitor up-to-date on vaccination
4.4	4	11	MS-8		2. Proportion of children under 5 years whose carers are advised to give them extra fluid and to continue feeding. (80.15)	Processes: EB care, harmful practices, patient-centered practices	Compliance with EB care practices	Experience	Process	Both	6 RCEB/Nutr/Growth	4	4	3	4	3	3	15		0	5	5	3	13		0		0	5	5	0	0	2.5	4	4	3	11	Yes	NOT SELECTED	NOT SELECTED	Obs
4.4	4	12	MS-8		3. Proportion of children or carers who received targeted health information or counselling for the condition of their child, including malnutrition, obesity, mental health or substance abuse. (85.68)	Inputs: Organization and availability of health services	Written/verbal instructions to discharged patients, transfer forms given, consent forms signed	Experience	Process	Both		4	4	3	5	3	3	16		0				0		0		0	5	5	0	0	2.5	4	4	3	11	Yes	SELECTED	NOT SELECTED	Client
4.4	4	13	MS-8		4. Proportion of all children with diarrhoea whose carers know how to prepare and administer ORS, give extra fluids, continue feeding and recognize danger signs.	Outcomes: client/career knowledge	Knowledge to prepare ORS, danger signs etc	Experience	Outcome	Both		4	4	3	5	3	3	16		0				0		0		0	5	5	0	0	2.5	4	4	3	11	Yes	SELECTED	NOT SELECTED	Client		Content-specific patient-centered outcome
5.1	5	1	MS-9		1. The health facility has adopted and implements a policy that guarantees free or affordable health care for all children, in accordance with and as defined by national legal or regulatory frameworks. (94.87)	Inputs: management and oversight	Oversight and management on patient-centered practices	Experience	Input Over&Man	Both		3	4	4	3	4	4	14		0				0		0		0	0	0	0	5	1	3	3	3	9	No	NOT SELECTED	NOT SELECTED	InR
5.1	5	2	MS-9		2. The health facility has adopted and implements a policy that guarantees nondiscrimination of any kind against children or their carers in the provision of care, including poor, vulnerable and disabled children. (90.44)	Inputs: management and oversight	Oversight and management on patient-centered practices	Experience	Input Over&Man	Both		3	4	4	3	4	4	14		0				0		0		0	0	0	5	5	2.5	3	3	3	9	Yes	NOT SELECTED	NOT SELECTED	InR
5.1	5	3	MS-9		3. The health facility has measures and facilities in place to ensure that children with disabilities or developmental delay have full physical access to all the facilities and services they require, including sanitation and recreation facilities. (93.40)	Inputs: Infrastructure, equipment client-centered	Infrastructure for client-centered practices	Experience	Input InfrastMedSupEquip	Both		4	4	3	5	4	4	16		0				0		0		0	0	0	5	5	2.5	3	3	3	9	Yes	SELECTED	NOT SELECTED	InR		similar to indicator # 6
5.1	5	4	MS-9		4. The health facility staff receive training and periodic refresher courses on nondiscrimination practices, promoting equity and cultural competence. (87.38)	Inputs: Human resources	Human resources: specific non-clinical training	Experience	Input HumRes	Both		4	4	4	3	4	4	15		0				0		0		0	0	0	5	5	2.5	3	3	3	9	Yes	NOT SELECTED	NOT SELECTED	Prov
5.1	5	5	MS-9		1. Proportion of children and their parents or carers who were exempted from out-of-pocket payment for treatment, medicines, interventions and other health care-related costs. (91.41)	Outomes: Access to medicines, services and facilities, financial access to services	Financial access to services	Experience	Outcome	Both		4	4	4	3	4	4	15		0				0		0		0	0	0	0	5	1	3	3	3	9	No	NOT SELECTED	NOT SELECTED	Client		Outomes: Access to medicines, services and facilities, financial access to services
5.1	5	6	MS-9		2. Proportion of children with a disability or their carers who report no physical barriers to accessing services and facilities in the health facility. (90.88)	Inputs: Infrastructure, equipment client-centered	Phisical access to facilities by patients with disabilities	Experience	Input InfrastMedSupEquip	Both		4	4	4	4	4	4	16		0				0		0		0	0	5	0	5	2	3	3	3	9	No	NOT SELECTED	NOT SELECTED	Client		similar to indicator # 3
5.1	5	7	MS-9		1. Proportion of children and their carers who report any form of discrimination or refusal of care because of their economic, social, religious, linguistic or other status. (88.85)	Outcomes: client-centered practices	Experienced maltreatment, receiving appropriate support and referral for maltreatment	Experience	Outcome	Both		4	4	4	4	4	4	16		0				0		0		0	0	5	5	5	3.5	5	5	3	13	Yes	SELECTED	CORE	Client	Quarterly
5.1	5	8	MS-9		2. Proportion of children in a minority, migrant or other vulnerable group who were satisfied with the services provided. (83.63)	Outcomes: client/career satisfaction	Satisfaction (client/career)	Experience	Outcome	Both		4	4	4	4	4	4	16		0				0		0		0	0	5	0	5	2	3	3	3	9	No	NOT SELECTED	NOT SELECTED	Client
5.1	5	9	MS-9		3. Proportion of children who receive care in the health facility whose financial access is mitigated or covered by health insurance. (88.86)	Outomes: Access to medicines, services and facilities, financial access to services	Financial access to services	Experience	Outcome	Both		4	3	4	4	4	4	15		0				0		0		0	0	0	0	5	1	3	3	3	9	No	NOT SELECTED	NOT SELECTED	Client		does not measure the quality of care
5.2	5	1	MS-9		1. The health facility has an up-to-date charter of children’s rights, in line with the United Nations Convention on the Rights of the Child. (93.49)	Inputs: Operational Guidelines	Operational guidelines, protocols related to client-centered practices	Experience	Input OperGuide	Both		4	3	4	4	4	4	15		0				0		0		0	0	0	0	5	1	3	3	3	9	No	NOT SELECTED	NOT SELECTED	InR
5.2	5	2	MS-9		2. The health facility visibly displays and makes available information about the charter in leaflets and posters, including child-friendly formats, in all areas in which children are cared for (wards, waiting rooms and play areas). (89.91)	Inputs: management and oversight	Oversight and management on patient-centered practices	Experience	Input Over&Man	Both		4	4	4	4	4	4	16		0				0		0		0	0	0	5	5	2.5	4	3	3	10	Yes	SELECTED	NOT SELECTED	InR
5.2	5	3	MS-9		3. The health facility promotes awareness-raising events about children’s rights, such as celebrating a children’s day. (82.80)	Inputs: management and oversight	Oversight and management on patient-centered practices	Experience	Input Over&Man	Both		3	3	4	4	4	4	14		0				0		0		0	0	0	0	5	1	3	3	3	9	No	NOT SELECTED	NOT SELECTED	InR
5.2	5	4	MS-9		4. The charter on children’s rights is integrated into the system for improving the quality of care in the health facility. (83.42)	Inputs: management and oversight	Oversight and management on patient-centered practices	Experience	Input Over&Man	Both		4	4	4	3	4	4	15		0				0		0		0	0	0	5	5	2.5	4	3	3	10	Yes	NOT SELECTED	NOT SELECTED	InR
5.2	5	5	MS-9		5. The health facility has a team or focal person responsible for overseeing observance of the charter on children’s rights in the health facility. (85.47)	Inputs: management and oversight	Oversight and management on patient-centered practices	Experience	Input Over&Man	Both		4	4	4	4	4	4	16		0				0		0		0	0	0	5	5	2.5	4	3	3	10	Yes	SELECTED	NOT SELECTED	InR
5.2	5	6	MS-9		1. Proportion of staff in the health facility who care for children who understand the charter on children’s rights and how to apply it in practice. (84.83)	Inputs: Human resources	Human resources: specific non-clinical training	Experience	Input HumRes	Both		4	3	4	4	4	4	15		0				0		0		0	0	0	5	5	2.5	4	3	3	10	Yes	NOT SELECTED	NOT SELECTED	Prov
5.2	5	7	MS-9		2. Proportion of children or their carers who are told about the charter on children's rights as it pertains to the right to care in an appropriate local language at admission. (82.01)	Inputs: Organization and availability of health services	Provision of regular, safe, nutritious meals, educating mothers how to express breast milk, informing about childrens' rights	Experience	Process	Inpatient		3	4	4	4	3	3	15		0				0		0		0	0	0	5	5	2.5	4	3	3	10	Yes	NOT SELECTED	NOT SELECTED	Client		Indicator 7 and 9 are similar. Best to measure client-reported outcome
5.2	5	9	MS-9		2. Proportion of children in the health facility who were admitted appropriately on the basis of clinical findings, diagnosis or the severity of the condition. (85.49)	Outcomes: client-centered practices	Experienced maltreatment, receiving appropriate support and referral for maltreatment inpatient	Experience	Process	Inpatient		3	4	3	3	3	3	13		0				0		0		0	0	0	5	5	2.5	4	3	3	10	Yes	NOT SELECTED	NOT SELECTED	RIS
5.2	5	8	MS-9		1. Proportion of children and their parents or caregivers who consider that they were adequately informed about their rights to care. (85.23)		Provision of regular, safe, nutritious meals, educating mothers how to express breast milk, informing about childrens' rights	Experience	Outcome	Both		4	4	4	4	3	3	16		0				0		0		0	0	5	5	5	3.5	4	3	3	10	Yes	SELECTED	NOT SELECTED	Client
5.3	5	1	MS-9		1. The health facility has written, up-to-date policies, guidelines and mechanisms to ensure written and verbal confidentiality. (93.00)	Inputs: Operational Guidelines	Operational guidelines, protocols related to client-centered practices	Experience	Input OperGuide	Both		4	4	4	3	3	4	15		0				0		0		0	0	0	5	5	2.5	3	3	3	9	Yes	NOT SELECTED	NOT SELECTED	InR
5.3	5	2	MS-9		2. The health facility has a policy on children’s right to confidential advice and counselling services without the presence of a parent or carer. (89.91)	Inputs: Operational Guidelines	Operational guidelines, protocols related to client-centered practices	Experience	Input OperGuide	Both		4	4	4	3	3	4	15		0				0		0		0	5	0	0	5	2.5	3	3	3	9	Yes	NOT SELECTED	NOT SELECTED	InR
5.3	5	3	MS-9		3. The health facility has facilities in which children can be examined with both visual and auditory privacy when required. (93.94)	Inputs: Infrastructure, equipment client-centered	Infrastructure for client-centered practices	Experience	Input InfrastMedSupEquip	Both		4	4	4	4	3	4	23		0				0		0		0	0	0	5	5	2.5	3	3	3	9	Yes	SELECTED	NOT SELECTED	InR
5.3	5	4	MS-9		4. Health facility staff are trained in providing care with respect for dignity and for maintaining confidentiality during the care of children and have received refresher training at least once in the past 12 months. (87.36)	Inputs: Human resources	Human resources: specific non-clinical training	Experience	Input HumRes	Both		4	4	4	3	4	4	15		0				0		0		0	0	0	5	5	2.5	3	3	3	9	Yes	NOT SELECTED	NOT SELECTED	Prov
5.3	5	5	MS-9		1. Proportion of health facility health care providers who have attended training or received orientation in respecting and protecting the dignity of children and their carers. (90.73)	Inputs: Human resources	Human resources: specific non-clinical training	Experience	Input HumRes	Both		4	4	4	3	4	4	15		0				0		0		0	0	0	5	5	2.5	3	3	3	9	Yes	NOT SELECTED	NOT SELECTED	Prov
5.3	5	6	MS-9		1. Proportion of older children cared for in the health facility who were satisfied with the privacy they enjoyed during care. (89.12)	Outcomes: client/career satisfaction	Satisfaction (client/career)	Experience	Outcome	Both		4	4	4	4	4	4	16		0				0		0		0	0	5	5	5	3.5	4	4	4	12	Yes	SELECTED	NOT SELECTED	Client
5.3	5	7	MS-9		2. Proportion of children and their carers in the health facility who perceived that they were treated with compassion and respect and their dignity was preserved. (90.20)	Outcomes: client/career satisfaction	Satisfaction (client/career)	Experience	Outcome	Both		4	4	4	4	4	4	16		0				0		0		0	0	5	5	5	3.5	4	5	4	13	Yes	SELECTED	CORE	Client	Quarterly
5.4	5	1	MS-9		1. The health facility has clear mechanisms, procedures and up-to-date national protocols that comply and are consistent with the Convention on the Rights of the Child and legal requirements for protecting children subject to suspected maltreatment. (94.88)	Inputs: Operational Guidelines	Operational guidelines, protocols related to client-centered practices	Experience	Input OperGuide	Both		4	3	3	4	3	3	14		0				0		0		0	0	0	5	5	2.5	3	3	3	9	Yes	NOT SELECTED	NOT SELECTED	InR
5.4	5	2	MS-9		2. The health facility has protocols, job aides or checklists that provide guidance for staff on detecting, documenting (taking forensic samples, photographs when allowed and forensic examination) and caring for child victims of maltreatment. (95.12)	Inputs: Operational Guidelines	Operational guidelines, protocols related to client-centered practices	Experience	Input OperGuide	Both		4	4	4	4	3	3	16		0				0		0		0	0	0	5	5	2.5	3	3	3	9	Yes	SELECTED	NOT SELECTED	InR
5.4	5	3	MS-9		3. The health facility has a system for registering and/or monitoring children who have been or are victims of any kind of suspected maltreatment. (92.32)	Input Heal&Sys	Health Information system (registering victims of maltreatment)	Experience	Input Heal&Sys	Both		4	3	4	4	3	3	15		0				0		0		0	0	0	5	5	2.5	3	3	3	9	Yes	NOT SELECTED	NOT SELECTED	InR
5.4	5	4	MS-9		4. The health facility has clear mechanisms and protocols for sharing appropriate information and concerns with relevant agencies. (92.78)	Inputs: Operational Guidelines	Operational guidelines, protocols related to client-centered practices	Experience	Input OperGuide	Both		4	3	4	4	3	3	15		0				0		0		0	0	0	5	5	2.5	3	3	3	9	Yes	NOT SELECTED	NOT SELECTED	InR
5.4	5	5	MS-9		5. The health facility has an effective multidisciplinary team and/or responsible person to investigate, care for and provide the necessary appropriate support to children with suspected maltreatment. (90.67)	Inputs: management and oversight	Oversight and management on patient-centered practices	Experience	Input Over&Man	Both		4	4	4	4			16		0				0		0		0	0	0	5	5	2.5	3	3	3	9	Yes	SELECTED	NOT SELECTED	InR
5.4	5	6	MS-9		6. The health facility staff receive training and orientation in identifying, assessing, communicating with and providing care and support for child victims of any form of maltreatment and on child protection procedures. (92.12)	Inputs: Human resources	Human resources: specific non-clinical training	Experience	Input HumRes	Both		4	3	4	4	3	3	15		0				0		0		0	0	0	5	5	2.5	3	3	3	9	Yes	NOT SELECTED	NOT SELECTED	Prov		this MEASURE IS SIMILAR TO MEASURE #8. THEREFORE, SELECTING JUST ONE, MORE INCLUSIVE
5.4	5	7	MS-9		1. Number of cases of suspected child maltreatment identified in the health facility in the past 12 months. (90.68)	Outcomes: client-centered practices	Experienced maltreatment, receiving appropriate support and referral for maltreatment	Experience	Process	Both		4	3	4	4	4	4	15		0				0		0		0	0	0	5	5	2.5	3	3	3	9	Yes	NOT SELECTED	NOT SELECTED	RIS
5.4	5	8	MS-9		2. Proportion of staff who care for children at the health facility who are trained in child protection, care and support. (92.29)	Inputs: Human resources	Human resources: specific non-clinical training	Experience	Input HumRes	Both		4	4	4	4	3	3	16		0				0		0		0	0	0	5	5	2.5	3	3	3	9	Yes	SELECTED	NOT SELECTED	Prov
5.4	5	9	MS-9		1. Proportion of children identified as victims of maltreatment who received protection, psychological support and appropriate referral. (90.56)	Outcomes: client-centered practices	Experienced maltreatment, receiving appropriate support and referral for maltreatment	Experience	Process	Both		4	5	3	4	3	3	16		0				0		0		0	0	0	5	5	2.5	4	3	3	10	Yes	SELECTED	NOT SELECTED	RIS
5.5	5	1	MS-9		1. The health facility has a food and nutrition policy and guidelines to meet children’s nutritional needs, including special needs, consistent with dietary requirements. (94.64)	Inputs: Operational Guidelines	Operational guidelines, protocols related to client-centered practices	Experience	Input OperGuide	Inpatient		4	4	4	3	3	3	15		0				0		0		0	0	0	5	5	2.5	3	3	3	9	Yes	NOT SELECTED	NOT SELECTED	InR
5.5	5	2	MS-9		2. The health facility has an up-to-date, written policy on breastfeeding that adheres to the International Code of Marketing of Breast-milk Substitutes and is routinely communicated to all health care staff. (93.66)	Inputs: Operational Guidelines	Operational guidelines, protocols related to client-centered practices	Experience	Input OperGuide	Inpatient		4	4	4	3	3	3	15		0				0		0		0	0	0	5	5	2.5	3	3	3	9	Yes	NOT SELECTED	NOT SELECTED	InR
5.5	5	3	MS-9		3. The health facility has an adequately equipped, designated kitchen (area or room) with facilities for food preparation. (92.64)	Inputs: Infrastructure, equipment client-centered	Infrastructure for client-centered practices inpatient	Experience	Input InfrastMedSupEquip	Inpatient		4	4	4	3	3	3	15		0				0		0		0	0	0	5	5	2.5	3	3	3	9	Yes	NOT SELECTED	NOT SELECTED	InR
5.5	5	4	MS-9		4. The health facility has a dedicated staff (or nutrition specialist) responsible for preparing children’s menus. (91.70)	Inputs: Human resources	Human resources (staff availability) inpatient	Experience	Input HumRes	Inpatient		5	4	4	3	3	3	16		0				0		0		0	0	0	5	5	2.5	3	3	3	9	Yes	SELECTED	NOT SELECTED	InR
5.5	5	5	MS-9		5. The health facility provides regular, safe, nutritious, appetizing, high-quality meals of sufficient variety to meet the needs of paediatric patients. (87.59)	Inputs: Organization and availability of health services	Provision of regular, safe, nutritious meals inpatient	Experience	Input OrgCare	Inpatient		4	4	4	3	3	3	15		0				0		0		0	0	0	5	5	2.5	3	3	3	9	Yes	NOT SELECTED	NOT SELECTED	InR
5.5	5	6	MS-9		1. Proportion of health facility staff who received training or orientation on child nutrition, including counselling on breastfeeding, at least once in the past 12 months. (92.02)	Inputs: Human resources	Human resources: specific non-clinical training	Experience	Input HumRes	Both	6 RCEB/Nutr/Growth	4	4	4	3	3	3	15		0				0		0		0	0	0	5	5	2.5	3	3	3	9	Yes	NOT SELECTED	NOT SELECTED	Prov
5.5	5	7	MS-9		2. Proportion of breastfeeding mothers who report that they were shown how to express breast milk or who were given written information about expressing breast milk. (91.69)	Inputs: Organization and availability of health services	Provision of regular, safe, nutritious meals, educating mothers how to express breast milk, informing about childrens' rights	Experience	Input OrgCare	Both	13 Support/Sick	4	4	4	4	4	4	16		0				0		0		0	0	0	5	5	2.5	3	3	3	9	Yes	SELECTED	NOT SELECTED	Client
5.5	5	9	MS-9		1. Proportion of children admitted to the health facility who were given food appropriate to their dietary requirements. (87.66)	Inputs: Organization and availability of health services	Provision of regular, safe, nutritious meals inpatient	Experience	Process	Inpatient	13 Support/Sick	4	4	3	4	4	3	15		0				0		0		0	0	0	5	5	2.5	3	3	3	9	Yes	NOT SELECTED	NOT SELECTED	RIS
5.5	5	8	MS-9		3. Proportion of children and their carers in the health facility who are satisfied with the facility meal service in terms of choice, quantity and number of servings per day. (84.92)	Outcomes: client/career satisfaction	Satisfaction (client/career) inpatient	Experience	Outcome	Inpatient		4	4	4	4	4	3	16		0				0		0		0	0	0	5	5	2.5	3	3	3	9	Yes	SELECTED	NOT SELECTED	Client
5.5	5	10	MS-9		2. Proportion of young infants under 6 months of age who are exclusively breastfed at discharge from the health facility. (87.53)	Impact/No disease-specific care outcomes	Children under 6 months exclusively breastfed inpatient	Experience	Outcome	Inpatient	13 Support/Sick	4	4	4	3	4	3	22		0				0		0		0	0	0	5	5	2.5	4	4	4	12	Yes	SELECTED	NOT SELECTED	RIS		This can be an impotant measure if we measure it among the babies who were born in the health facility (not discharged yet) or were exclusively breastfed upon admission Indicator # 10 of 5.5.; #6 of of 6.1., #7 of 1.6. and #15 of 1.2. are the same
6.1	6	1	MS-10		1. The health facility has an up-to-date, family-centred policy on parents’ and carers’ right to stay with their children at all times, including during medical procedures. (90.75)	Inputs: Operational Guidelines	Operational guidelines, protocols related to client-centered practices	Experience	Input OperGuide	Both	15 Prev/unnes/harm	4	4	4	3	4	4	15		0				0		0		0	5	0	0	5	2.5	3	3	3	9	Yes	NOT SELECTED	NOT SELECTED	InR		similar to indicator #2
6.1	6	2	MS-10		2. The health facility has a rooming-in policy so that parents or carers can stay with their children and provides accommodation close to the child’s bed. (93.06)	Inputs: Operational Guidelines	Operational guidelines, protocols related to client-centered practices inpatient	Experience	Input OperGuide	Both	15 Prev/unnes/harm	4	4	4	3	4	4	15		0				0		0		0	5	0	0	5	2.5	3	3	3	9	Yes	NOT SELECTED	NOT SELECTED	InR		similar to indicator #1
6.1	6	3	MS-10		3. The health facility has areas where parents or carers can breastfeed, prepare special meals for their children or for themselves and meet family and friends. (90.60)	Inputs: Infrastructure, equipment client-centered	Infrastructure for client-centered practices inpatient	Experience	Input InfrastMedSupEquip	Inpatient		4	3	4	4	4	4	15		0				0		0		0	5	0	0	5	2.5	3	3	3	9	Yes	NOT SELECTED	NOT SELECTED	InR
6.1	6	4	MS-10		4. The health facility staff receive training and regular mentoring or refresher training in children’s rights, including the right not be separated from their parents, and also in parents' rights and responsibilities. (88.62)	Inputs: Human resources	Human resources: specific non-clinical training	Experience	Input HumRes	Inpatient		4	4	4	3	4	4	15		0				0		0		0	5	0	0	5	2.5	3	3	3	9	Yes	NOT SELECTED	NOT SELECTED	Prov
6.1	6	5	MS-10		1. Proportion of parents and/or carers who were given the opportunity to room-in with their children. (88.78)	Outcomes: client-centered practices	Room-in or staying with child during medical procedures inpatient	Experience	Outcome	Inpatient		4	3	4	4	4	4	15		0				0		0		0	5	0	0	5	2.5	3	3	3	9	Yes	NOT SELECTED	NOT SELECTED	Client		Similar to indicator #8, which was selected and is more flexible
6.1	6	6	MS-10		2. Proportion of infants under 6 months of age admitted to the facility who are exclusively breastfeeding or given only expressed breast milk by cup and spoon. (86.42)	Impact/No disease-specific care outcomes	Children under 6 months exclusively breastfed inpatient	Experience	Outcome	Inpatient	13 Support/Sick	3	4	4	4	3	4	15		0				0		0		0	5	0	0	5	2.5	4	3	3	10	Yes	NOT SELECTED	NOT SELECTED	RIS		Indicator # 10 of 5.5.; #6 of of 6.1., #7 of 1.6. and #15 of 1.2. are the same; I have selected it for Standard 5.5.
6.1	6	7	MS-10		1. Proportion of children in the health facility whose parents or carers stayed with them during medical procedures. (86.57)	Outcomes: client-centered practices	Room-in or staying with child during medical procedures	Experience	Outcome	Both		4	4	4	4	3	4	16		0				0		0		0	5	5	0	5	3.5	3	3	3	9	Yes	SELECTED	NOT SELECTED	Client
6.1	6	8	MS-10		2. Proportion of children admitted to the health facility whose parents or carers were allowed to room-in or were provided with nearby accommodation at night. (88.54)	Outcomes: client-centered practices	Room-in or staying with child during medical procedures inpatient	Experience	Outcome	Inpatient	13 Support/Sick	4	4	4	4	3	4	16		0				0		0		0	5	5	0	5	3.5	3	3	3	9	Yes	SELECTED	NOT SELECTED	Client
6.1	6	9	MS-10		3. Proportion of children admitted to the health facility whose parents or carers were provided with food or had access to facilities to prepare food. (88.16)	Outcomes: client-centered practices	Room-in or staying with child during medical procedures inpatient	Experience	Outcome	Inpatient		4	4	4	4	3	4	16		0				0		0		0	5	5	0	5	3.5	3	3	3	9	Yes	SELECTED	NOT SELECTED	Client
6.2	6	1	MS-10		1. The health facility has a written, up-to-date policy to protect children’s right to play and learn while at the facility. (93.51)	Inputs: Operational Guidelines	Operational guidelines, protocols related to client-centered practices inpatient	Experience	Input OperGuide	Both		3	4	4	4	4	4	15		0				0		0		0	0	0	0	5	1	3	3	3	9	No	NOT SELECTED	NOT SELECTED	InR
6.2	6	2	MS-10		2. The health facility has a system for meeting the educational and learning needs of school-aged children. (87.95)	Inputs: Operational Guidelines	Operational guidelines, protocols related to client-centered practices inpatient	Experience	Input OperGuide	Inpatient		3	4	4	4	4	4	15		0				0		0		0	0	0	0	5	1	3	3	3	9	No	NOT SELECTED	NOT SELECTED	InR
6.2	6	3	MS-10		3. The health facility has dedicated spaces for age-appropriate play, which are accessible to all children, including those with a disability. (93.82)	Inputs: Infrastructure, equipment client-centered	Infrastructure for client-centered practices	Experience	Input InfrastMedSupEquip	Inpatient		4	4	4	4	3	4	16		0				0		0		0	5	0	0	5	2.5	3	3	3	9	Yes	SELECTED	NOT SELECTED	InR
6.2	6	4	MS-10		4. The health facility staff are trained in using various forms of play, including sensory stimulation for young infants. (86.53)	Inputs: Human resources	Human resources: specific non-clinical training	Experience	Input HumRes	Inpatient		3	4	4	4	4	4	15		0				0		0		0	5	0	0	5	2.5	3	3	3	9	Yes	NOT SELECTED	NOT SELECTED	Prov
6.2	6	5	MS-10		1. Proportion of children in the health facility who were involved in play and recreation provided by the facility within the past 24 h. (75.85)	Inputs: Organization and availability of health services	Organization of processes inpatient (given opportunity to room-in, excluseively reastfeeding/given expressed milk by cup), kids involved in play and recreation	Experience	Process	Inpatient		3	4	4	4	3	4	15		0				0		0		0	5	0	0	5	2.5	3	3	3	9	Yes	NOT SELECTED	NOT SELECTED	Obs
6.2	6	6	MS-10		2. Proportion of health providers who routinely use play techniques during medical procedures as part of therapeutic care. (78.72)	Processes: EB care, harmful practices, patient-centered practices	Provision of patient-centered practices	Experience	Process	Inpatient		3	4	4	4	3	4	15		0				0		0		0	5	0	0	5	2.5	3	3	3	9	Yes	NOT SELECTED	NOT SELECTED	Prov
6.2	6	9	MS-10		3. Proportion of children who received play therapy during their most recent medical procedure or treatment. (81.91)	Outomes: Access to medicines, services and facilities	Access to playroom, access to facility's educational program, received play therapy	Experience	Process	Both		4	4	4	4	3	4	16		0				0		0		0	5	0	0	5	2.5	3	3	3	9	Yes	SELECTED	NOT SELECTED	Obs
[truncated: 128 more rows]

## Sheet: Metadata_core
		Associated quality standard	Associated quality statement	Indicator name	Indicator – detailed definition	Numerator	Denominator	Proposed disaggregation	Classification (input, process, outcome, impact)	Proposed service level (inpatient & outpatient)	Proposed measurement method	Proposed data source	Proposed measurement frequency	Additional information
[truncated: 25 more rows]

[truncated: 5 more sheets: Metadata_Catalogue, Lists, MS-1 Domain 1 Weights, MS-8,9,10 Domain 3 Weights, list of QSs and Quality Statem]
